# Supplementary material
Source: PubMed Central journal article supplement (PMC4847728)
Supplement: NIHMS774196-supplement-Supporting_Information.pdf [file NIHMS774196-supplement-Supporting_Information.pdf]

Supporting Information for  
**Thiostrepton Variants Containing a Contracted Quinaldic Acid Macrocycle Result from  
Mutagenesis of the Second Residue**

Feifei Zhang, Chaoxuan Li and Wendy L. Kelly\*

**Table of Contents**

|                                                                                                        |     |
|--------------------------------------------------------------------------------------------------------|-----|
| Supplemental Methods.....                                                                              | S3  |
| <b>Figure S1.</b> Two diagnostic daughter ions from thiostrepton MALDI MS/MS.....                      | S5  |
| <b>Figure S2.</b> MS analysis of thiostrepton Ala2Dha.....                                             | S6  |
| <b>Figure S3.</b> Structure and numbering system used for thiostrepton Ala2Dha.....                    | S8  |
| <b>Figure S4.</b> <sup>1</sup> H NMR spectrum of thiostrepton Ala2Dha.....                             | S9  |
| <b>Figure S5.</b> <sup>13</sup> C NMR spectrum of thiostrepton Ala2Dha.....                            | S10 |
| <b>Figure S6.</b> DEPT-135 spectrum of thiostrepton Ala2Dha.....                                       | S11 |
| <b>Figure S7.</b> gHSQC spectrum of thiostrepton Ala2Dha.....                                          | S12 |
| <b>Figure S8.</b> gCOSY spectrum of thiostrepton Ala2Dha.....                                          | S13 |
| <b>Figure S9.</b> gHMBC spectrum of thiostrepton Ala2Dha.....                                          | S14 |
| <b>Table S1.</b> <sup>1</sup> H and <sup>13</sup> C NMR assignments of thiostrepton Ala2Dha.....       | S15 |
| <b>Figure S10.</b> MS analysis of thiostrepton Ala2Dhb.....                                            | S17 |
| <b>Figure S11.</b> Structure and numbering system used for thiostrepton Ala2Dhb.....                   | S19 |
| <b>Figure S12.</b> <sup>1</sup> H NMR spectrum of thiostrepton Ala2Dhb.....                            | S20 |
| <b>Figure S13.</b> <sup>13</sup> C NMR spectrum of thiostrepton Ala2Dhb.....                           | S21 |
| <b>Figure S14.</b> DEPT-135 spectrum of thiostrepton Ala2Dhb.....                                      | S22 |
| <b>Figure S15.</b> gHSQC spectrum of thiostrepton Ala2Dhb.....                                         | S23 |
| <b>Figure S16.</b> gCOSY spectrum of thiostrepton Ala2Dhb.....                                         | S24 |
| <b>Figure S17.</b> gHMBC spectrum of thiostrepton Ala2Dhb.....                                         | S25 |
| <b>Table S2.</b> <sup>1</sup> H and <sup>13</sup> C NMR assignments of thiostrepton Ala2Dhb.....       | S26 |
| <b>Figure S18.</b> MS analysis of thiostrepton Ala2Ile-ΔIle1.....                                      | S28 |
| <b>Figure S19.</b> Structure and numbering system used for thiostrepton Ala2Ile-ΔIle1.....             | S30 |
| <b>Figure S20.</b> <sup>1</sup> H NMR spectrum of thiostrepton Ala2Ile-ΔIle1.....                      | S31 |
| <b>Figure S21.</b> <sup>13</sup> C NMR spectrum of thiostrepton Ala2Ile-ΔIle1.....                     | S32 |
| <b>Figure S22.</b> DEPT-135 spectrum of thiostrepton Ala2Ile-ΔIle1.....                                | S33 |
| <b>Figure S23.</b> gHSQC spectrum of thiostrepton Ala2Ile-ΔIle1.....                                   | S34 |
| <b>Figure S24.</b> gCOSY spectrum of thiostrepton Ala2Ile-ΔIle1.....                                   | S35 |
| <b>Figure S25.</b> gHMBC spectrum of thiostrepton Ala2Ile-ΔIle1.....                                   | S36 |
| <b>Table S3.</b> <sup>1</sup> H and <sup>13</sup> C NMR assignments of thiostrepton Ala2Ile-ΔIle1..... | S37 |
| <b>Figure S26.</b> MS analysis of thiostrepton Ala2Met.....                                            | S39 |
| <b>Figure S27.</b> MS analysis of thiostrepton Ala2Phe.....                                            | S41 |
| <b>Figure S28.</b> MS analysis of thiostrepton Ala2Tyr.....                                            | S43 |

|                                                                                                                               |     |
|-------------------------------------------------------------------------------------------------------------------------------|-----|
| <b>Figure S29.</b> MS analysis of thiostrepton Ala2Val-Ile1 .....                                                             | S45 |
| <b>Figure S30.</b> Structure and numbering system used for thiostrepton Ala2Val- $\Delta$ Ile1 .....                          | S47 |
| <b>Figure S31.</b> $^1\text{H}$ NMR spectrum of thiostrepton Ala2Val- $\Delta$ Ile1 .....                                     | S48 |
| <b>Figure S32.</b> $^{13}\text{C}$ NMR spectrum of thiostrepton Ala2Val- $\Delta$ Ile1 .....                                  | S49 |
| <b>Figure S33.</b> DEPT-135 spectrum of thiostrepton Ala2Val- $\Delta$ Ile1 .....                                             | S50 |
| <b>Figure S34.</b> gHSQC spectrum of thiostrepton Ala2Val- $\Delta$ Ile1 .....                                                | S51 |
| <b>Figure S35.</b> gCOSY spectrum of thiostrepton Ala2Val- $\Delta$ Ile1 .....                                                | S52 |
| <b>Figure S36.</b> gHMBC spectrum of thiostrepton Ala2Val- $\Delta$ Ile1 .....                                                | S53 |
| <b>Table S4.</b> $^1\text{H}$ and $^{13}\text{C}$ NMR assignments of thiostrepton Ala2Val- $\Delta$ Ile1 .....                | S54 |
| <b>Figure S37.</b> HPLC-MS analysis of a crude culture extract from <i>S. laurentii</i> NDS1/int-A2L .....                    | S56 |
| <b>Figure S38.</b> HPLC-MS analysis of a crude culture extract from <i>S. laurentii</i> NDS1/int-A2M.....                     | S58 |
| <b>Figure S39.</b> HPLC-MS analysis of a crude culture extract from <i>S. laurentii</i> NDS1/int-A2F.....                     | S60 |
| <b>Figure S40.</b> A representative MS analysis revealing the presence of shunt metabolites of thiostrepton biosynthesis..... | S62 |
| <b>Table S5.</b> Summary of HR-MALDI-MS results of thiostrepton Ala2 analogues.....                                           | S65 |
| <b>Table S6.</b> Titers of the thiostrepton Ala2 analogues .....                                                              | S65 |
| <b>Table S7.</b> Aqueous solubilities of thiostrepton Ala2 analogues.....                                                     | S66 |
| <b>Table S8.</b> Strains and plasmids used in this study.....                                                                 | S66 |
| <b>Table S9.</b> PCR Primers used in this study.....                                                                          | S68 |
| <b>References</b> .....                                                                                                       | S68 |

## Supplemental Methods

**General Materials and Methods.** Unless otherwise indicated, all chemicals and solvents were purchased from common vendors and used as received. Enzymes and buffers were acquired from New England Biolabs. The Wizard<sup>®</sup> Genomic DNA Purification Kit was used to isolate *Streptomyces* genomic DNA. Isolation of plasmids and fosmids from *E. coli* strains were performed using the QIAprep Spin Miniprep Kit and DirectPrep 96 MiniPrep Kit from Qiagen. Polymerase chain reaction (PCR) products were cloned using the StrataClone Blunt PCR Cloning Kit (Agilent Technologies). 96-well tissue culture plates and 96-well black with clear flat bottom plates were obtained from Becton Dickinson and Corning, respectively. 384-well black plates were purchased from PerkinElmer. A BioTek H4 Multi-Mode Microplate Reader was used for optical density, fluorescence, and luminescence measurements. All oligonucleotides were synthesized by Integrated DNA Technologies. DNA sequencing was performed by Eurofins MWG Operon, and sequence analysis was completed using the VectorNTI software package from Invitrogen.

High performance liquid chromatography (HPLC) analysis was performed on a Beckman Coulter System Gold instrument. High-resolution matrix-assisted laser desorption/ionization mass spectrometry (HR-MALDI-MS), MALDI-MS/MS and HPLC-MS were conducted with an Applied Biosystems 4700 Proteomics Analyzer and a Micromass Quattro LC at the Georgia Institute of Technology Bioanalytical Mass Spectrometry Facility. High-resolution electrospray ionization mass spectrometry (HR-ESI-MS) was performed on a Thermo LTQ-FTMS at the Emory University Mass Spectrometry Center. For HPLC-MS, a Phenomenex Synergi RP column (250 mm x 2 mm, 4  $\mu$ m) (Torrance, CA) was developed at 0.25 mL min<sup>-1</sup> with 20% solvent B in solvent A for 8 min followed by a gradient from 20 to 100% solvent B over 35 min (Solvent A: 5% acetonitrile and 0.1% formic acid in water; solvent B: 5% water and 0.1% formic acid in acetonitrile). NMR experiments were completed on a Bruker 500 MHz spectrometer according to standard pulse sequences supplied with the instrument at the Georgia Institute of Technology School of Chemistry and Biochemistry.

**Bacterial Strains, Plasmids, and Growth Media.** *Streptomyces laurentii* ATCC 31255 (*S. laurentii*), methicillin-resistant *Staphylococcus aureus* ATCC 10537 (MRSA), vancomycin-resistant *Enterococcus faecium* ATCC 12952 (VRE), *Bacillus* sp. ATCC 27859 (*Bacillus*), and *Escherichia coli* (*E. coli*) ATCC 27856 were all purchased from American Type Culture Collection (ATCC). *E. coli* EPI300 was obtained from Epicentre<sup>®</sup>. All strains, plasmids, and fosmids are itemized in Table S8, and primers are listed in Table S9. All *E. coli* strains were grown in Luria-Bertani liquid or solid medium with the appropriate antibiotic(s). For the selective growth of *E. coli* or *Streptomyces*, the following antibiotics and concentrations were used: apramycin (50  $\mu$ g mL<sup>-1</sup>), kanamycin (50  $\mu$ g mL<sup>-1</sup>), ampicillin (100  $\mu$ g mL<sup>-1</sup>), nalidixic acid (25  $\mu$ g mL<sup>-1</sup>), and chloramphenicol (12.5  $\mu$ g mL<sup>-1</sup>). MS agar and ISP3 agar were used for the intergeneric conjugation of *S. laurentii* NDS1 and sporulation of *S. laurentii* strains, respectively.<sup>1, 2</sup>

**Purification and Mass Spectrometry Analyses of Thiostrepton Ala2 Analogues.** *S. laurentii* variant culture extracts were first precipitated as previously described.<sup>3</sup> The solid residue of the culture extract was dissolved in a minimum volume of chloroform and mixed with 10 volumes of *n*-hexane followed by centrifugation for 5 min at 4000 rpm (2559 x *g*) and 25 °C. The precipitate was then dissolved in a minimum volume of dichloromethane:ethanol (4:1). Diethyl ether (5 volumes) was added to the sample and the mixture was centrifuged at 4000 rpm (2559 x

g) for 5 min at 25 °C. The solid residue was dissolved in chloroform:methanol (4:1) and further purified by semi-preparative HPLC using a Phenomenex Luna C18(2) column (250 x 10 mm, 5 µm) with water and acetonitrile, as described below, at 4.3 mL min<sup>-1</sup> while monitoring absorbance at 254 nm.

Purification of thiostreptons Ala2Dha, Ala2Dhb, Ala2Met, Ala2Phe, Ala2Tyr, and Ala2Ile-ΔIle1, and Ala2Val-ΔIle1 all utilized the same gradient: acetonitrile was increased from 0 to 100% in water over 30 min. Thiostrepton Ala2Ile-ΔIle1 and Ala2Val-ΔIle1 were subjected to a second round of semi-preparative HPLC purification by holding the mobile phase constant at 40% acetonitrile in water for 10 min. Purified samples were analyzed by HPLC-MS, MALDI-MS/MS, either HR-ESI-MS or HR-MALDI-MS, and stored under argon at -80 °C. Thiostreptons Ala2Dha, Ala2Dhb, Ala2Ile-ΔIle1, and Ala2Val-ΔIle1 were further analyzed by one- and two-dimensional NMR.

Kinetic solubilities of the thiostreptons were determined using a previously described protocol.<sup>4, 5</sup>

**Figure S1.** Two diagnostic daughter ions from the MALDI MS/MS of thiostrepton A and its analogues used to confirm the identity of the second residue. Fragment **A** corresponds to the loss of the quinaldic acid (QA) moiety and Ile1 from the parent ion, and fragment **B** additionally lacks the second residue (Xxx2).

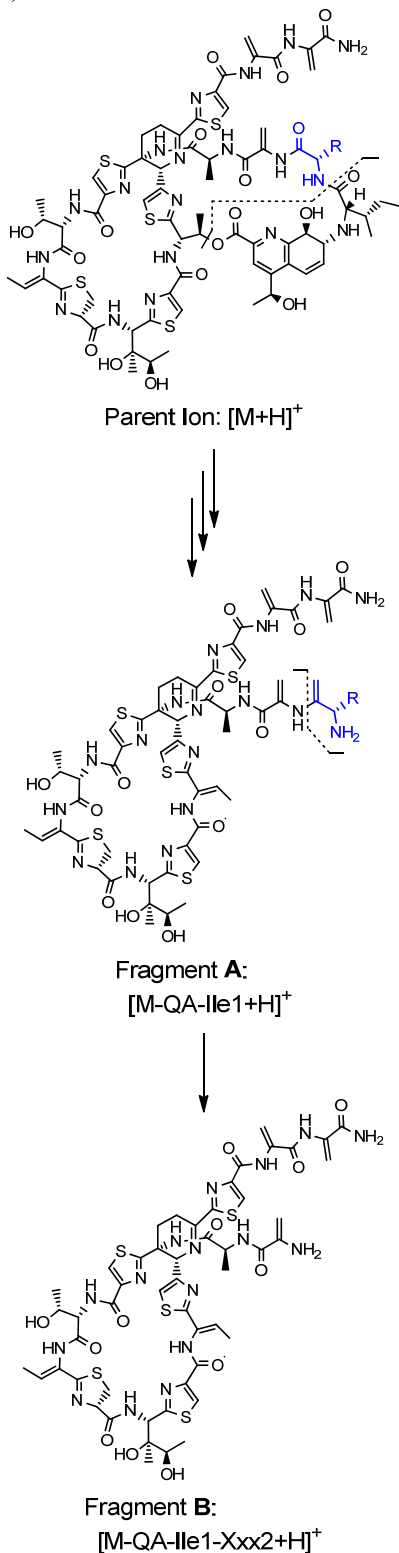

**Figure S2.** MS analysis of thiostrepton Ala2Dha isolated from *S. laurentii* NDS1/int-A2S.

(A) HPLC-MS analysis. (1) Chromatogram extracted for  $m/z$  831.7, the calculated  $[M+2H]^{2+}$  ion of thiostrepton Ala2Dha. (2) Total ion chromatogram.

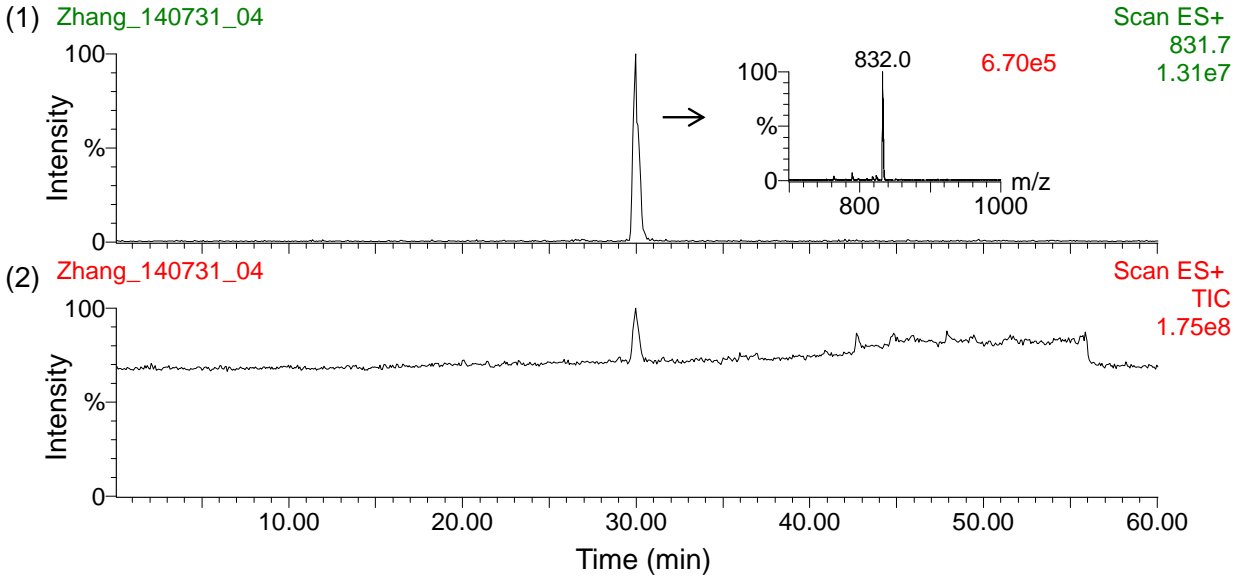

(B) MALDI MS spectrum of thiostrepton Ala2Dha.

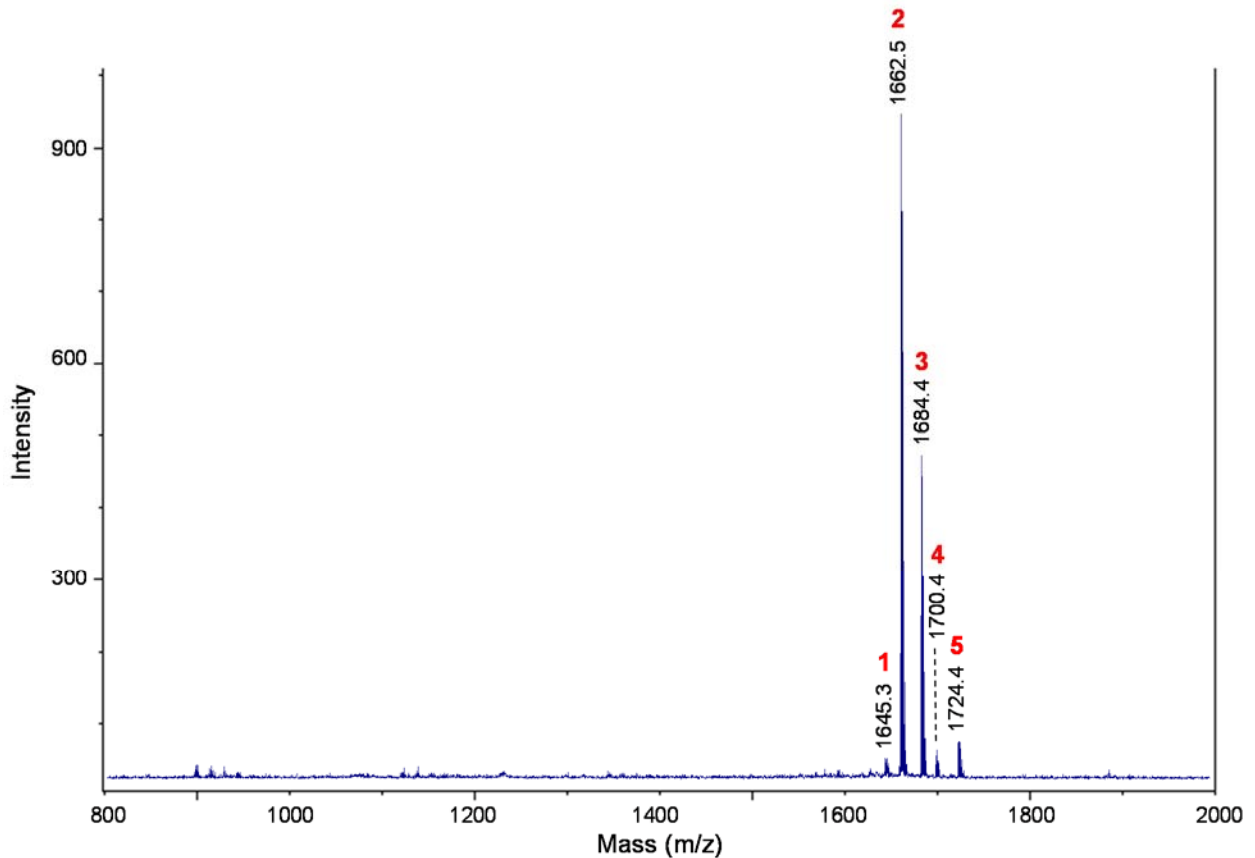

(C) MALDI MS/MS of parent ion  $m/z$  1662.5.

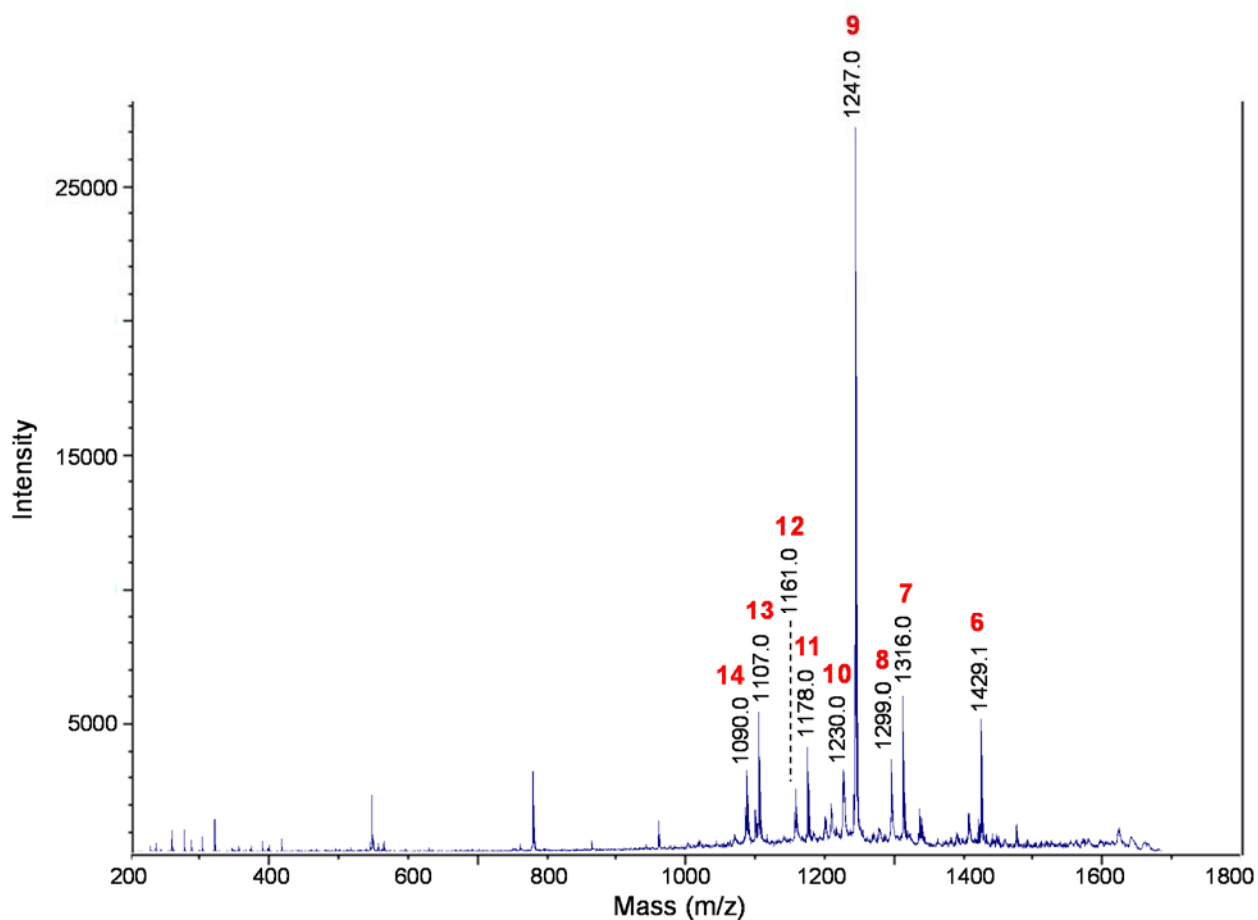

(D) Table and structure showing key ions and fragments in the MALDI MS and MS/MS of thiostrepton Ala2Dha.

| Fragment                                       | Expected | Observed |
|------------------------------------------------|----------|----------|
| 1. M-OH+H <sup>+</sup>                         | 1645.5   | 1645.3   |
| 2. M+H <sup>+</sup> (Parent ion)               | 1662.5   | 1662.5   |
| 3. M+Na <sup>+</sup>                           | 1684.5   | 1684.4   |
| 4. M+K <sup>+</sup>                            | 1700.4   | 1700.4   |
| 5. M+Cu <sup>+</sup>                           | 1724.4   | 1724.4   |
| 6. M-QA+H <sup>+</sup>                         | 1429.4   | 1429.1   |
| 7. M-QA-Ile1+H <sup>+</sup>                    | 1316.3   | 1316.0   |
| 8. M-QA-Ile1-OH+H <sup>+</sup>                 | 1299.3   | 1299.0   |
| 9. M-QA-Ile1-Dha2+H <sup>+</sup>               | 1247.3   | 1247.0   |
| 10. M-QA-Ile1-Dha2-OH+H <sup>+</sup>           | 1230.3   | 1230.0   |
| 11. M-QA-Ile1-Dha2-Dha3+H <sup>+</sup>         | 1178.3   | 1178.0   |
| 12. M-QA-Ile1-Dha2-Dha3-OH+H <sup>+</sup>      | 1161.3   | 1161.0   |
| 13. M-QA-Ile1-Dha2-Dha3-Ala4+H <sup>+</sup>    | 1107.3   | 1107.0   |
| 14. M-QA-Ile1-Dha2-Dha3-Ala4-OH+H <sup>+</sup> | 1090.2   | 1090.0   |

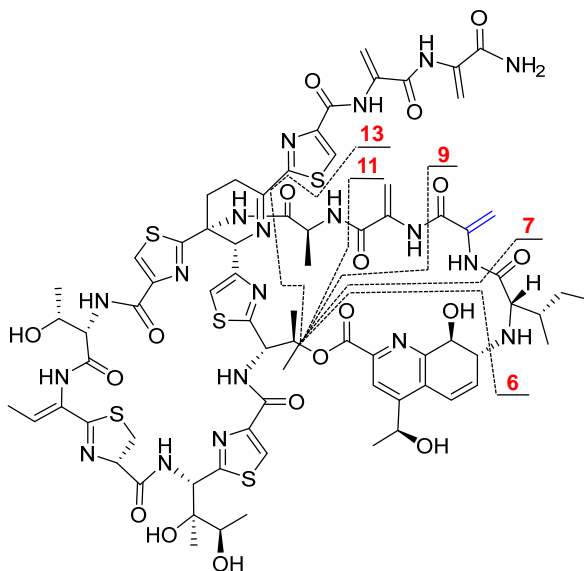

**Figure S3.** Structure and numbering system used for thiostrepton Ala2Dha.

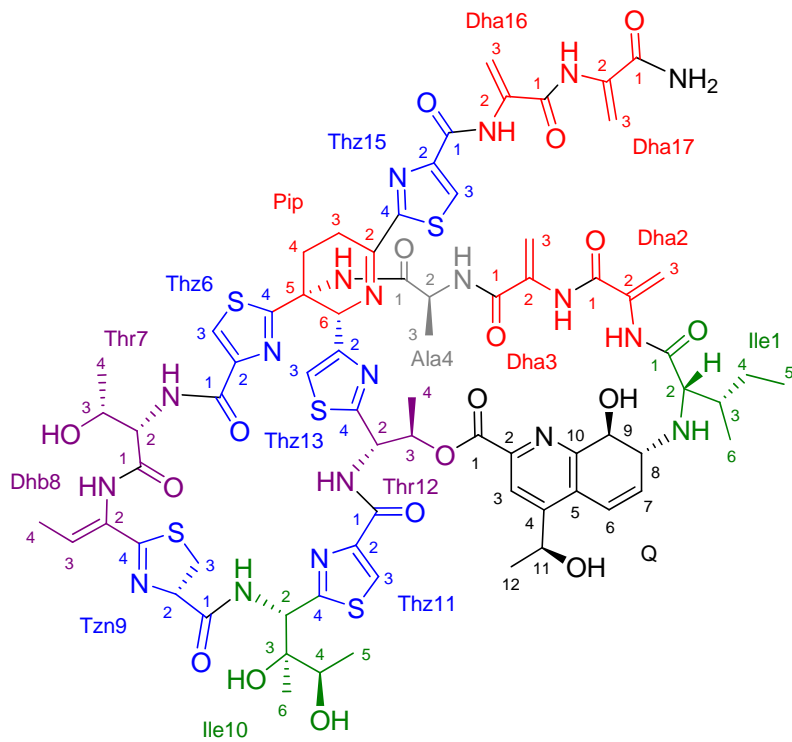



Ala2Dha  
Standard H

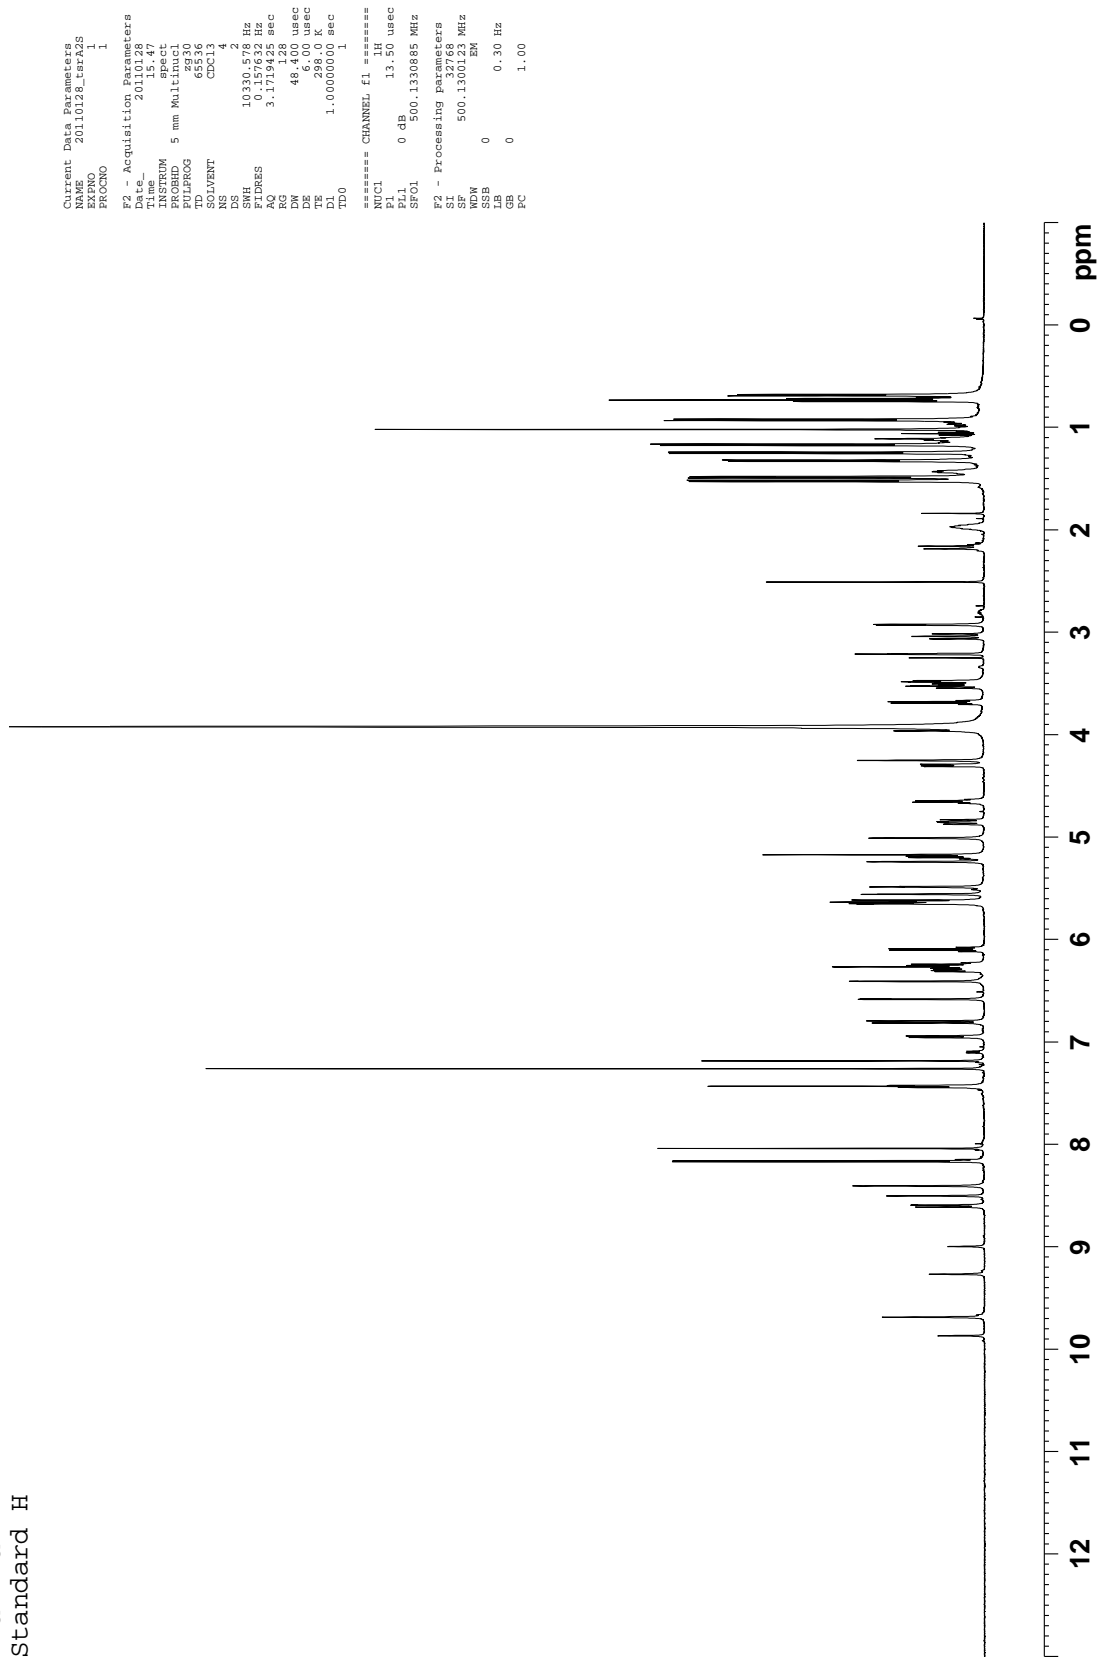

**Figure S4.**  $^1\text{H}$  NMR spectrum of thiostrepton Ala2Dha (500 MHz,  $\text{CDCl}_3\text{-CD}_3\text{OD}$  4:1, 25  $^\circ\text{C}$ ).

Ala2Dha  
Standard C13

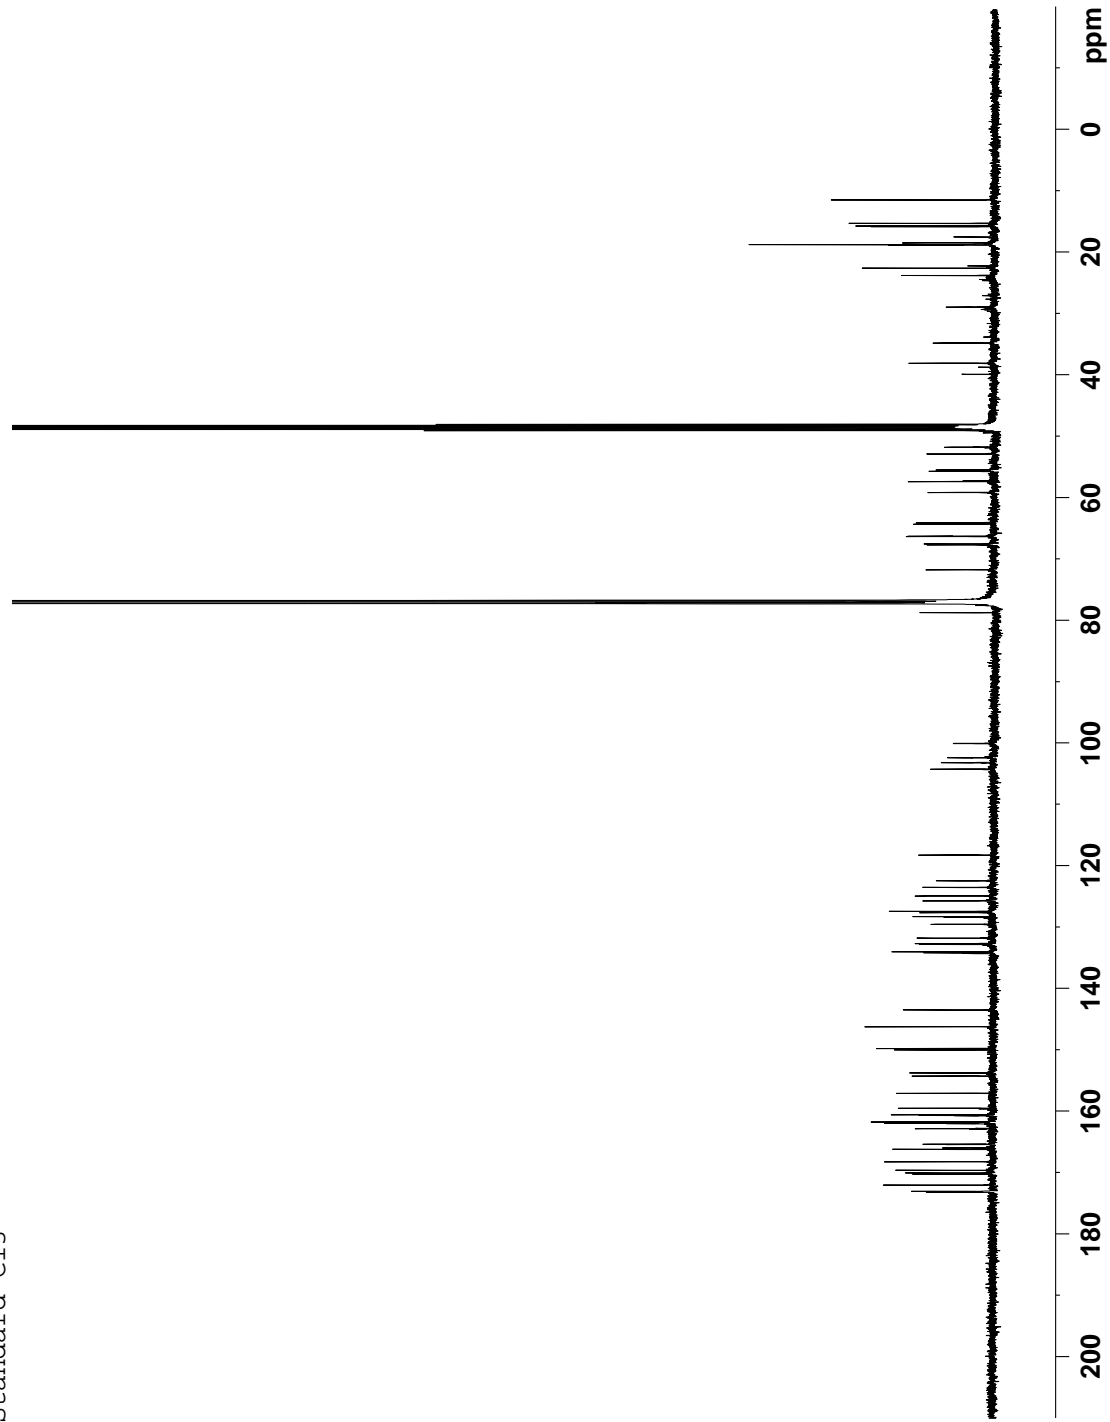

```

Current Data Parameters
NAME 20110128_LeaM2S
EXPNO 2
PROCNO 1
F2 - Acquisition Parameters
File_ 20110128
Time 15:26
INSTRUM spect
PROBHD 5 mm Multichannel
PULPROG zgpg30
TD 65536
SOLVENT CDCl3
DS 15000
SS 0
SMH 30010.029 Hz
FIDRES 0.45278 Hz
AQ 1.0931744 sec
RG 8122
AQ 1.0931744 sec
DE 16.00 usec
TE 298.0 K
D1 2.0000000 sec
DELTA 1.8999998 sec
TDO 1
===== CHANNEL f1 =====
NUC1 13C
P1 12.50 usec
PL1 0 dB
SFO1 125.7703643 MHz
===== CHANNEL f2 =====
CPDPRG2 waltz16
NUC2 1H
P2 69.00 usec
PL2 14.04 dB
SFO2 500.132005 MHz
F2 - Processing parameters
SF 125.7578665 MHz
RG 65536
GB 0
PC 1.40
  
```

**Figure S5.**  $^{13}\text{C}$  NMR spectrum of thiostrepton Ala2Dha (125 MHz,  $\text{CDCl}_3\text{-CD}_3\text{OD}$  4:1, 25  $^\circ\text{C}$ ).

Ala2Dha  
DEPT135

```
Current Data Parameters
NAME      20110128_Lsra28
PROCNO    1
F2 - Acquisition Parameters
Date_     20110128
Time      13.33
INSTRUM   spect
PROBHD    5 mm Multibru
PULPROG   zgpg30
TD         65536
SOLVENT   CDCl3
NS         9810
DS         4
SWH        30030.029 Hz
FIDRES    0.458222 Hz
AQ         1.084744 sec
RG         145.744
DW         16.650 usec
DE         6.00 usec
TE         300.2 K
CONST2    145.0000000
D1         2.00000000 sec
d2         0.00344828 sec
d3         0.00000000 sec
DELTA     0.00000000 sec
TD0       1
===== CHANNEL f1 =====
NUC1       13C
P1         12.50 usec
P2         25.00 usec
PL1        0 dB
PL2        0 dB
SFO1       125.7703643 MHz
===== CHANNEL f2 =====
NUC2       13C
P3         13.50 usec
P4         27.00 usec
PL3        0 dB
PL4        0 dB
SFO2       500.1320005 MHz
F2 - Processing Parameters
SI         32768
SF         125.7578259 MHz
SM         EM
SR         0
GB         0
PC         1.40
```

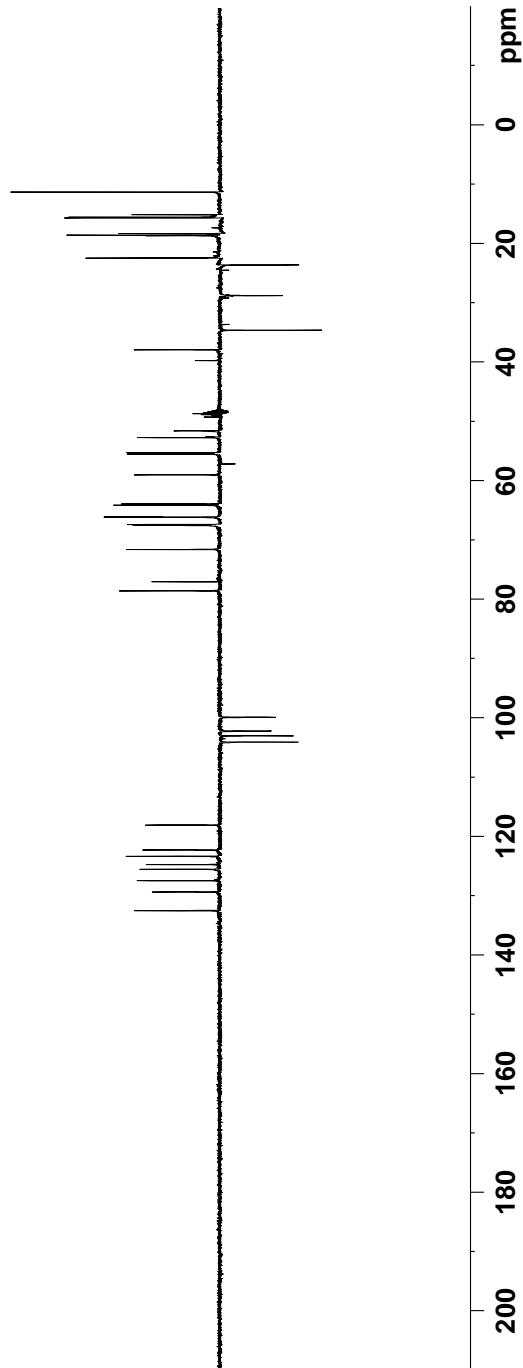

**Figure S6.** DEPT-135 NMR spectrum of thioestrepton Ala2Dha (125 MHz, CDCl<sub>3</sub>-CD<sub>3</sub>OD 4:1, 25 °C).







**Table S1.** <sup>1</sup>H and <sup>13</sup>C NMR assignments of thiostrepton Ala2Dha

| Position              | $\delta_c$ [ppm];<br>mult | $\delta_H$ [ppm];<br>(mult, J in Hz)                                            | HMBC <sup>a</sup>                                           | COSY <sup>b</sup>                                                                          |
|-----------------------|---------------------------|---------------------------------------------------------------------------------|-------------------------------------------------------------|--------------------------------------------------------------------------------------------|
| <i>Ile1</i>           |                           |                                                                                 |                                                             |                                                                                            |
| Ile1-1                | 173.0; C q                |                                                                                 |                                                             |                                                                                            |
| Ile1-2                | 66.3; CH                  | 2.93 (d, 3.8)                                                                   | Ile1-1; Ile1-3; Ile1-4; Ile1-6; Q8                          | Ile1-3                                                                                     |
| Ile1-3                | 38.1; CH                  | 2.00-1.94 (m)                                                                   |                                                             | Ile1-2; Ile1-4-H <sub>A</sub> ; Ile1-4-H <sub>B</sub> ; Ile1-6                             |
| Ile1-4                | 23.8; CH <sub>2</sub>     | H <sub>A</sub> : 1.14-1.10 (m)<br>H <sub>B</sub> : 0.99-0.94 (m)                | Ile1-5                                                      | Ile1-3; Ile1-4-H <sub>B</sub> ; Ile1-5                                                     |
| Ile1-5                | 11.5; CH <sub>3</sub>     | 0.73 (t, 7.1)                                                                   | Ile1-3; Ile1-4                                              | Ile1-3; Ile1-4-H <sub>A</sub> ; Ile1-5                                                     |
| Ile1-6                | 15.7; CH <sub>3</sub>     | 0.92 (d, 6.9)                                                                   | Ile1-2; Ile1-3; Ile1-4                                      | Ile1-4-H <sub>A</sub> ; Ile1-4-H <sub>B</sub><br>Ile1-3                                    |
| <i>Dha2</i>           |                           |                                                                                 |                                                             |                                                                                            |
| Dha2-1                | 160.7; C q                |                                                                                 |                                                             |                                                                                            |
| Dha2-2                | 134.2; C q                |                                                                                 |                                                             |                                                                                            |
| Dha2-3                | 100.1; CH <sub>2</sub>    | H <sub>A</sub> : 6.27 (br s)<br>H <sub>B</sub> : 5.01 (d, 1.4)                  | Dha2-1; Dha2-2<br>Dha2-1; Dha2-2                            | Dha2-3-H <sub>B</sub><br>Dha2-3-H <sub>A</sub>                                             |
| <i>Dha3</i>           |                           |                                                                                 |                                                             |                                                                                            |
| Dha3-1                | 162.8; C q                |                                                                                 |                                                             |                                                                                            |
| Dha3-2                | 131.8; C q                |                                                                                 |                                                             |                                                                                            |
| Dha3-3                | 102.4; CH <sub>2</sub>    | H <sub>A</sub> : 5.65 (d, 2.2)<br>H <sub>B</sub> : 5.24 (br s)                  | Dha3-1; Dha3-2<br>Dha3-1                                    | Dha3-3-H <sub>B</sub><br>Dha3-3-H <sub>A</sub> ; Dha3-NH                                   |
| Dha3-NH <sup>d</sup>  |                           | 8.40 (s)                                                                        | Dha2-1; Dha3-1; Dha3-3                                      | Dha3-3-H <sub>B</sub>                                                                      |
| <i>Ala4</i>           |                           |                                                                                 |                                                             |                                                                                            |
| Ala4-1                | 173.1; C q                |                                                                                 |                                                             |                                                                                            |
| Ala4-2                | 51.8; CH                  | 4.65 (q, 6.6)                                                                   | Dha3-1; Ala4-1; Ala4-3                                      | Ala4-3; Ala4-NH                                                                            |
| Ala4-3                | 18.8; CH <sub>3</sub>     | 1.32 (d, 6.7)                                                                   | Ala4-1; Ala4-2                                              | Ala4-2                                                                                     |
| Ala4-NH <sup>d</sup>  |                           | 7.10 (d, 8.2)                                                                   |                                                             | Ala4-2                                                                                     |
| <i>Pip</i>            |                           |                                                                                 |                                                             |                                                                                            |
| Pip-2                 | 161.9; C q                |                                                                                 |                                                             |                                                                                            |
| Pip-3                 | 24.5; CH <sub>2</sub>     | H <sub>A</sub> : 3.36-3.32 (m)<br>H <sub>B</sub> : 2.83-2.77 (m)                |                                                             | Pip-4-H <sub>B</sub><br>Pip-4-H <sub>A</sub> ; Pip-4-H <sub>B</sub>                        |
| Pip-4                 | 28.9; CH <sub>2</sub>     | H <sub>A</sub> : 3.95 (m)<br>H <sub>B</sub> : 2.17 (m)                          | Pip-2; Pip-3; Pip-5; Pip-6; Thz6-4; Thz13-2<br>Pip-3; Pip-6 | Pip-4-H <sub>B</sub><br>Pip-3-H <sub>A</sub> ; Pip-4-H <sub>A</sub> ; Pip-3-H <sub>B</sub> |
| Pip-5                 | 57.3; C q                 |                                                                                 |                                                             |                                                                                            |
| Pip-6                 | 64.1; CH                  | 5.17 (s)                                                                        | Pip-2; Pip-4; Pip-5; Thz13-2; Thz13-3; Thz15-4              | Pip-3-H <sub>A</sub> ; Pip-3-H <sub>B</sub>                                                |
| <i>Thz6</i>           |                           |                                                                                 |                                                             |                                                                                            |
| Thz6-1                | 161.7; C q                |                                                                                 |                                                             |                                                                                            |
| Thz6-2                | 146.2; C q                |                                                                                 |                                                             |                                                                                            |
| Thz6-3                | 124.9; CH                 | 8.04 (s)                                                                        | Thz6-1; Thz6-2; Thz6-4                                      |                                                                                            |
| Thz6-4                | 169.6; C q                |                                                                                 |                                                             |                                                                                            |
| <i>Thr7</i>           |                           |                                                                                 |                                                             |                                                                                            |
| Thr7-1                | 165.4; C q                |                                                                                 |                                                             |                                                                                            |
| Thr7-2                | 55.7; CH                  | 4.30 (dd, 7.7, 3.6)                                                             | Thz6-1; Thr7-1; Thr7-3; Thr7-4                              | Thr7-3; Thr7-NH                                                                            |
| Thr7-3                | 66.3; CH                  | 1.46-1.40 (m)                                                                   | Thr7-4                                                      | Thr7-2; Thr7-4                                                                             |
| Thr7-4                | 18.8; CH <sub>3</sub>     | 0.68 (d, 6.3)                                                                   | Thr7-2; Thr7-3                                              | Thr7-3                                                                                     |
| Thr7-NH <sup>d</sup>  |                           | 6.95 (d, 7.6)                                                                   | Thz6-1; Thr7-1                                              | Thr7-2                                                                                     |
| <i>Dhb8</i>           |                           |                                                                                 |                                                             |                                                                                            |
| Dhb8-2                | 128.3; C q                |                                                                                 |                                                             |                                                                                            |
| Dhb8-3                | 132.7; CH                 | 6.10 (q, 7.0)                                                                   | Dhb8-2; Dhb8-4; Tzn9-4                                      | Dhb8-4                                                                                     |
| Dhb8-4                | 15.3; CH <sub>3</sub>     | 1.48 (d, 7.3)                                                                   | Dhb8-2; Dhb8-3; Tzn9-4                                      | Dhb8-3                                                                                     |
| <i>Tzn9</i>           |                           |                                                                                 |                                                             |                                                                                            |
| Tzn9-1                | 172.0; C q                |                                                                                 |                                                             |                                                                                            |
| Tzn9-2                | 78.8; CH                  | 4.85 (dd, 12.8, 9.0)                                                            | Tzn9-1; Tzn9-3; Tzn9-4                                      | Tzn9-3-H <sub>A</sub> ; Tzn9-3-H <sub>B</sub>                                              |
| Tzn9-3                | 34.8; CH <sub>2</sub>     | H <sub>A</sub> : 3.52 (dd, 11.2, 9.0)<br>H <sub>B</sub> : 3.04 (dd, 12.8, 11.5) | Tzn9-2; Tzn9-4<br>Tzn9-1; Tzn9-2                            | Tzn9-2; Tzn9-3-H <sub>B</sub><br>Tzn9-2; Tzn9-3-H <sub>A</sub>                             |
| Tzn9-4                | 170.2; C q                |                                                                                 |                                                             |                                                                                            |
| <i>Ile10</i>          |                           |                                                                                 |                                                             |                                                                                            |
| Ile10-2               | 52.9; CH                  | 5.62 (d, 5.1)                                                                   | Tzn9-1; Ile10-3; Thz11-4                                    | Ile10-NH                                                                                   |
| Ile10-3               | 77.1 <sup>c</sup> ; C q   |                                                                                 |                                                             |                                                                                            |
| Ile10-4               | 67.6; CH                  | 3.68 (q, 6.4)                                                                   | Ile10-2; Ile10-3; Ile10-5; Ile10-6                          | Ile10-5                                                                                    |
| Ile10-5               | 15.8; CH <sub>3</sub>     | 1.17 (d, 6.3)                                                                   | Ile10-3; Ile10-4                                            | Ile10-4                                                                                    |
| Ile10-6               | 18.5; CH <sub>3</sub>     | 1.02 (s)                                                                        | Ile10-2; Ile10-3; Ile10-4                                   |                                                                                            |
| Ile10-NH <sup>d</sup> |                           | 7.43 (d, 9.8)                                                                   | Tzn9-1                                                      | Ile10-2                                                                                    |

| Position              | $\delta_c$ [ppm];<br>mult | $\delta_H$ [ppm];<br>(mult, J in Hz)                             | HMBC <sup>a</sup>                    | COSY <sup>b</sup>                                |
|-----------------------|---------------------------|------------------------------------------------------------------|--------------------------------------|--------------------------------------------------|
| <i>Thz11</i>          |                           |                                                                  |                                      |                                                  |
| Thz11-1               | 162.0; C q                |                                                                  |                                      |                                                  |
| Thz11-2               | 150.0; C q                |                                                                  |                                      |                                                  |
| Thz11-3               | 125.7; CH                 | 8.16 (s)                                                         | Thz11-1; Thz11-2; Thz11-4            |                                                  |
| Thz11-4               | 166.2; C q                |                                                                  |                                      |                                                  |
| <i>Thr12</i>          |                           |                                                                  |                                      |                                                  |
| Thr12-2               | 55.5; CH                  | 5.64 (d, 4.1)                                                    | Thz11-1; Thr12-4; Thz13-2; Thz13-4   | Thr12-3, Thr12-NH                                |
| Thr12-3               | 71.8; CH                  | 6.25 (q, 6.7)                                                    | Thr12-4; Thz13-4; Q-1                | Thr12-2, Thr12-4                                 |
| Thr12-4               | 18.8; CH <sub>3</sub>     | 1.52 (d, 6.3)                                                    | Thr12-2; Thr12-3                     | Thr12-3                                          |
| Thr12-NH <sup>d</sup> |                           | 8.60 (d, 8.9)                                                    |                                      | Thr12-2                                          |
| <i>Thz13</i>          |                           |                                                                  |                                      |                                                  |
| Thz13-2               | 157.1; C q                |                                                                  |                                      |                                                  |
| Thz13-3               | 118.3; CH                 | 7.43 (s)                                                         | Pip-6; Thz13-2; Thz13-4              |                                                  |
| Thz13-4               | 170.0; C q                |                                                                  |                                      |                                                  |
| <i>Thz15</i>          |                           |                                                                  |                                      |                                                  |
| Thz15-1               | 159.5; C q                |                                                                  |                                      |                                                  |
| Thz15-2               | 149.8; C q                |                                                                  |                                      |                                                  |
| Thz15-3               | 127.6; CH                 | 8.17 (s)                                                         | Thz15-1; Thz15-2; Thz15-4            |                                                  |
| Thz15-4               | 168.2; C q                |                                                                  |                                      |                                                  |
| <i>Dha16</i>          |                           |                                                                  |                                      |                                                  |
| Dha16-1               | 162.0; C q                |                                                                  |                                      |                                                  |
| Dha16-2               | 134.0; C q                |                                                                  |                                      |                                                  |
| Dha16-3               | 103.2; CH <sub>2</sub>    | H <sub>A</sub> : 6.58 (d, 2.2)<br>H <sub>B</sub> : 5.48 (d, 2.2) | Dha16-1; Dha16-2<br>Dha16-1; Dha16-2 | Dha16-3-H <sub>B</sub><br>Dha16-3-H <sub>A</sub> |
| <i>Dha17</i>          |                           |                                                                  |                                      |                                                  |
| Dha17-1               | 166.0; C q                |                                                                  |                                      |                                                  |
| Dha17-2               | 132.8; C q                |                                                                  |                                      |                                                  |
| Dha17-3               | 104.3; CH <sub>2</sub>    | H <sub>A</sub> : 6.41 (d, 1.2)<br>H <sub>B</sub> : 5.56 (d, 1.6) | Dha17-1; Dha17-2<br>Dha17-1; Dha17-2 | Dha17-3-H <sub>B</sub><br>Dha17-3-H <sub>A</sub> |
| <i>Q</i>              |                           |                                                                  |                                      |                                                  |
| Q-1                   | 160.6; C q                |                                                                  |                                      |                                                  |
| Q-2                   | 143.5; C q                |                                                                  |                                      |                                                  |
| Q-3                   | 122.5; CH                 | 7.18 (s)                                                         | Q-1; Q-5; Q-11                       |                                                  |
| Q-4                   | 153.8; C q                |                                                                  |                                      |                                                  |
| Q-5                   | 127.4; C q                |                                                                  |                                      |                                                  |
| Q-6                   | 123.5; CH                 | 6.80 (d, 10.1)                                                   | Q-5; Q-8; Q-10                       | Q-7                                              |
| Q-7                   | 129.5; CH                 | 6.30 (dd, 9.8, 5.7)                                              | Q-5; Q-8; Q-9                        | Q-6; Q-8; Q-9                                    |
| Q-8                   | 59.2; CH                  | 3.48 (dd, 5.9, 1.8)                                              | Q-6; Q-7; Q-9; Q-10; Ile1-2          | Q-7; Q-9                                         |
| Q-9                   | 67.7; CH                  | 4.25 (s)                                                         | Q-5; Q-7; Q-8; Q-10                  | Q-7; Q-8                                         |
| Q-10                  | 154.3; C q                |                                                                  |                                      |                                                  |
| Q-11                  | 64.3; CH                  | 5.19 (q, 6.6)                                                    | Q-3; Q-5; Q-12                       | Q-12                                             |
| Q-12                  | 22.6; CH <sub>3</sub>     | 1.25 (d, 6.6)                                                    | Q-4; Q-11                            | Q-11                                             |

<sup>a</sup> HMBC correlations are from the proton to the indicated carbon.

<sup>b</sup> COSY correlations are from the proton to the proton attached to the indicated position.

<sup>c</sup> The  $\delta$  of this resonance was determined by HMBC due to overlap with the CDCl<sub>3</sub> resonance.

<sup>d</sup> Only those amide resonances demonstrating HMBC or COSY correlations to neighboring carbons or protons, respectively, were assigned.



**Figure S10.** MS analysis of thiostrepton Ala2Dhb isolated from *S. laurentii* NDS1/int-A2T.

(A) HPLC-MS analysis. (1) Chromatogram extracted for  $m/z$  838.8, the calculated  $[M+2H]^{2+}$  ion of thiostrepton Ala2Dhb. (2) Total ion chromatogram.

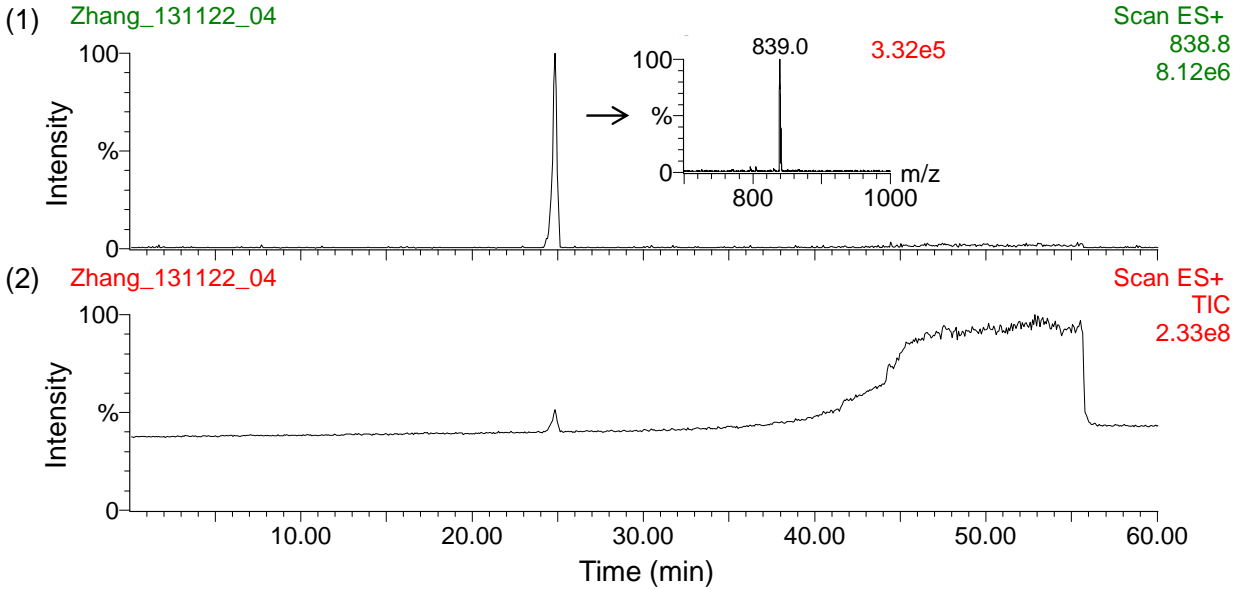

(B) MALDI MS spectrum of thiostrepton Ala2Dhb.

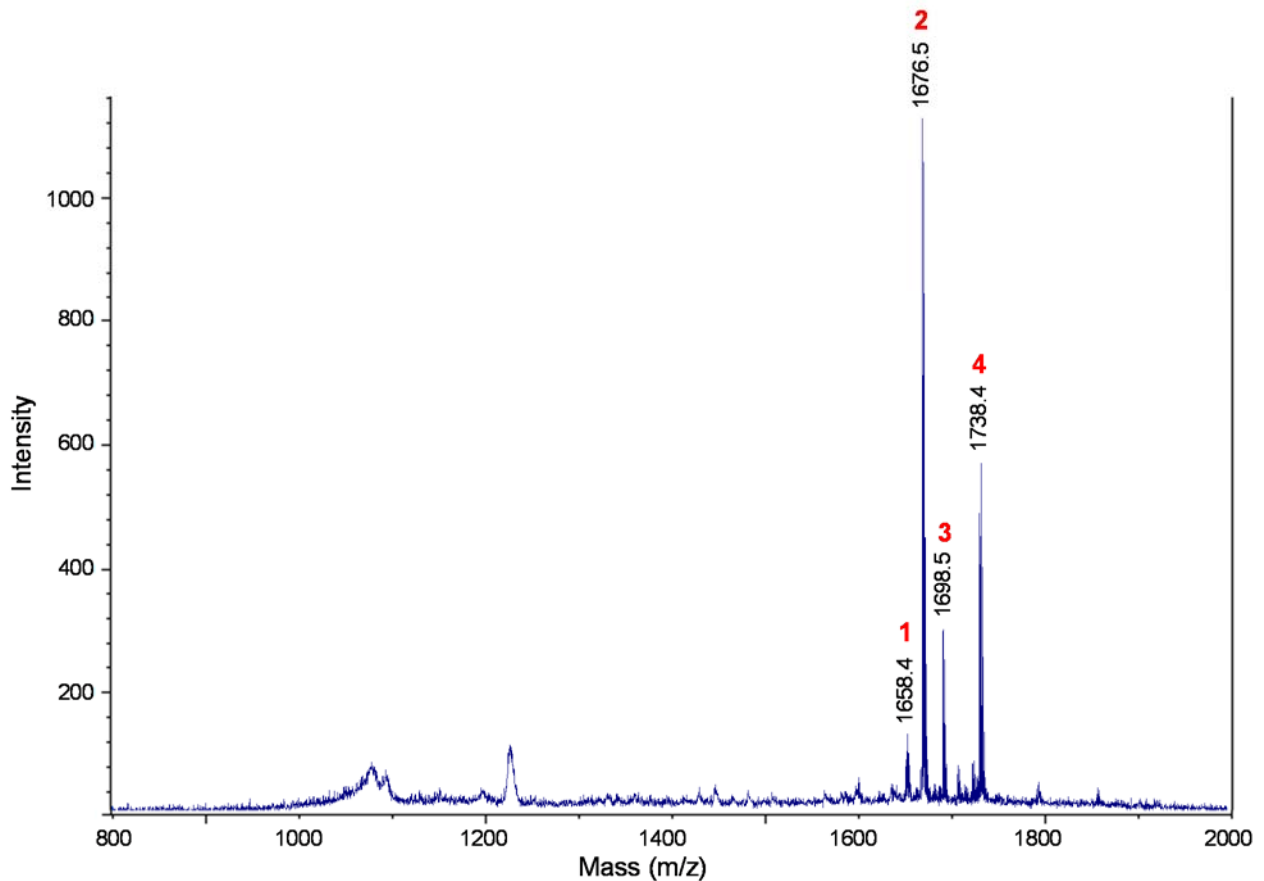

(C) MALDI MS/MS of parent ion  $m/z$  1676.5.

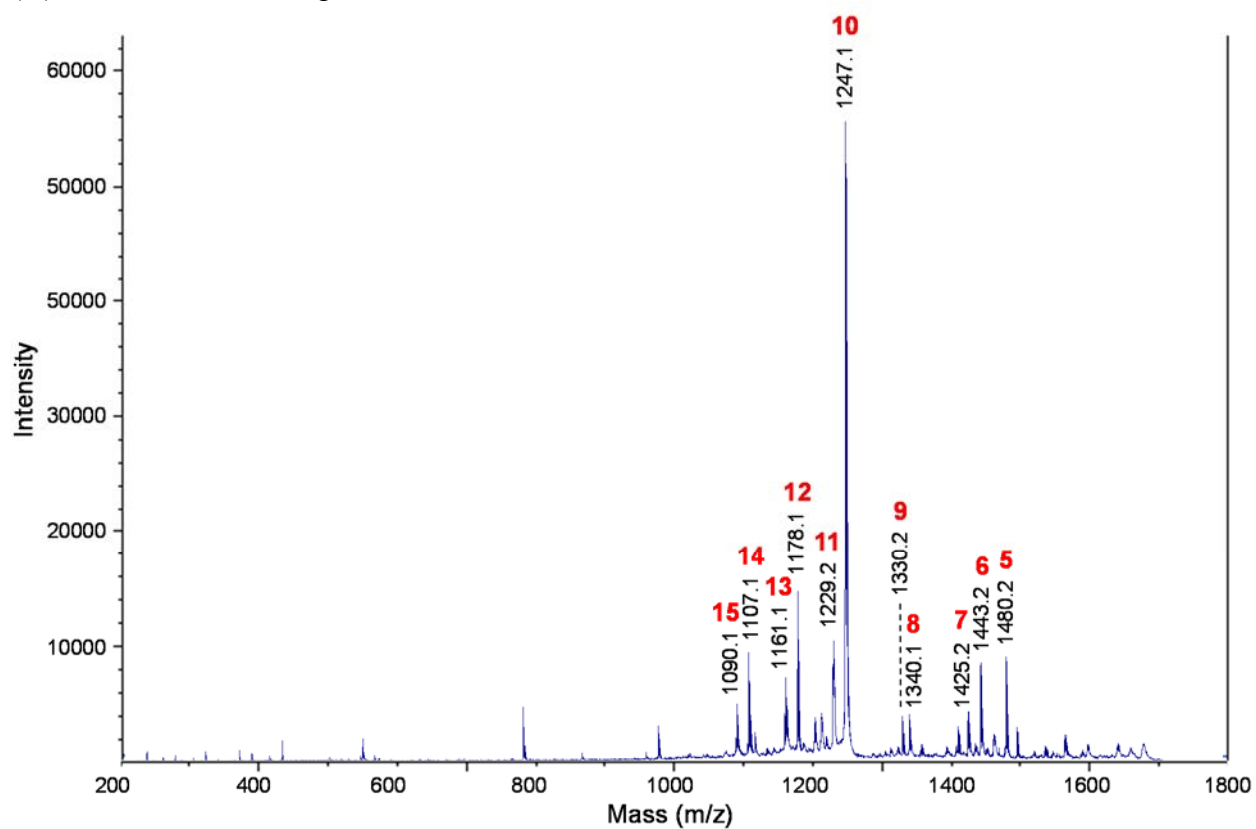

(D) Table and structure showing key ions and fragments in the MALDI MS and MS/MS of thiostrepton Ala2Dhb.

| Fragment                                           | Expected | Observed |
|----------------------------------------------------|----------|----------|
| 1. M-H <sub>2</sub> O+H <sup>+</sup>               | 1658.5   | 1658.4   |
| 2. M+H <sup>+</sup> (Parent ion)                   | 1676.5   | 1676.5   |
| 3. M+Na <sup>+</sup>                               | 1698.5   | 1698.5   |
| 4. M+Cu <sup>+</sup>                               | 1738.4   | 1738.4   |
| 5. M-Ile1-Dhb2+H <sup>+</sup>                      | 1480.4   | 1480.2   |
| 6. M-QA+H <sup>+</sup>                             | 1443.4   | 1443.2   |
| 7. M-QA-H <sub>2</sub> O+H <sup>+</sup>            | 1425.4   | 1425.2   |
| 8. M-Ile1-Dhb2-Dha3-Ala4+H <sup>+</sup>            | 1340.3   | 1340.1   |
| 9. M-QA-Ile1+H <sup>+</sup>                        | 1330.3   | 1330.2   |
| 10. M-QA-Ile1-Dhb2+H <sup>+</sup>                  | 1247.3   | 1247.1   |
| 11. M-QA-Ile1-Dhb2-H <sub>2</sub> O+H <sup>+</sup> | 1229.3   | 1229.2   |
| 12. M-QA-Ile1-Dhb2-Dha3+H <sup>+</sup>             | 1178.3   | 1178.1   |
| 13. M-QA-Ile1-Dhb2-Dha3-OH+H <sup>+</sup>          | 1161.3   | 1161.1   |
| 14. M-QA-Ile1-Dhb2-Dha3-Ala4+H <sup>+</sup>        | 1107.3   | 1107.1   |
| 15. M-QA-Ile1-Dhb2-Dha3-Ala4-OH+H <sup>+</sup>     | 1090.2   | 1090.1   |

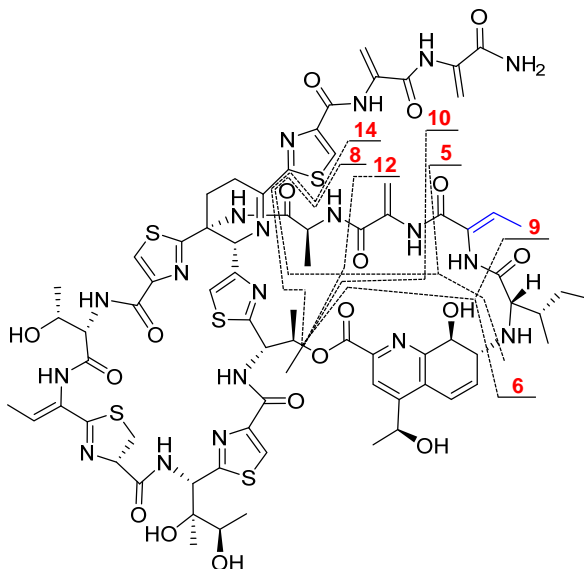

**Figure S11.** Structure and numbering system used for thiostrepton Ala2Dhb.

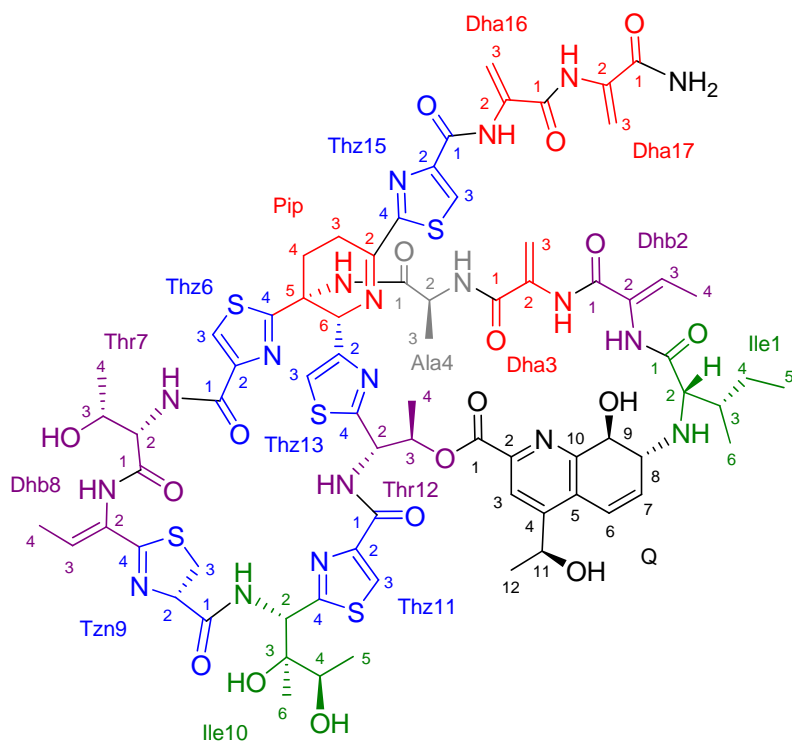

Ala2Dhb  
Standard H

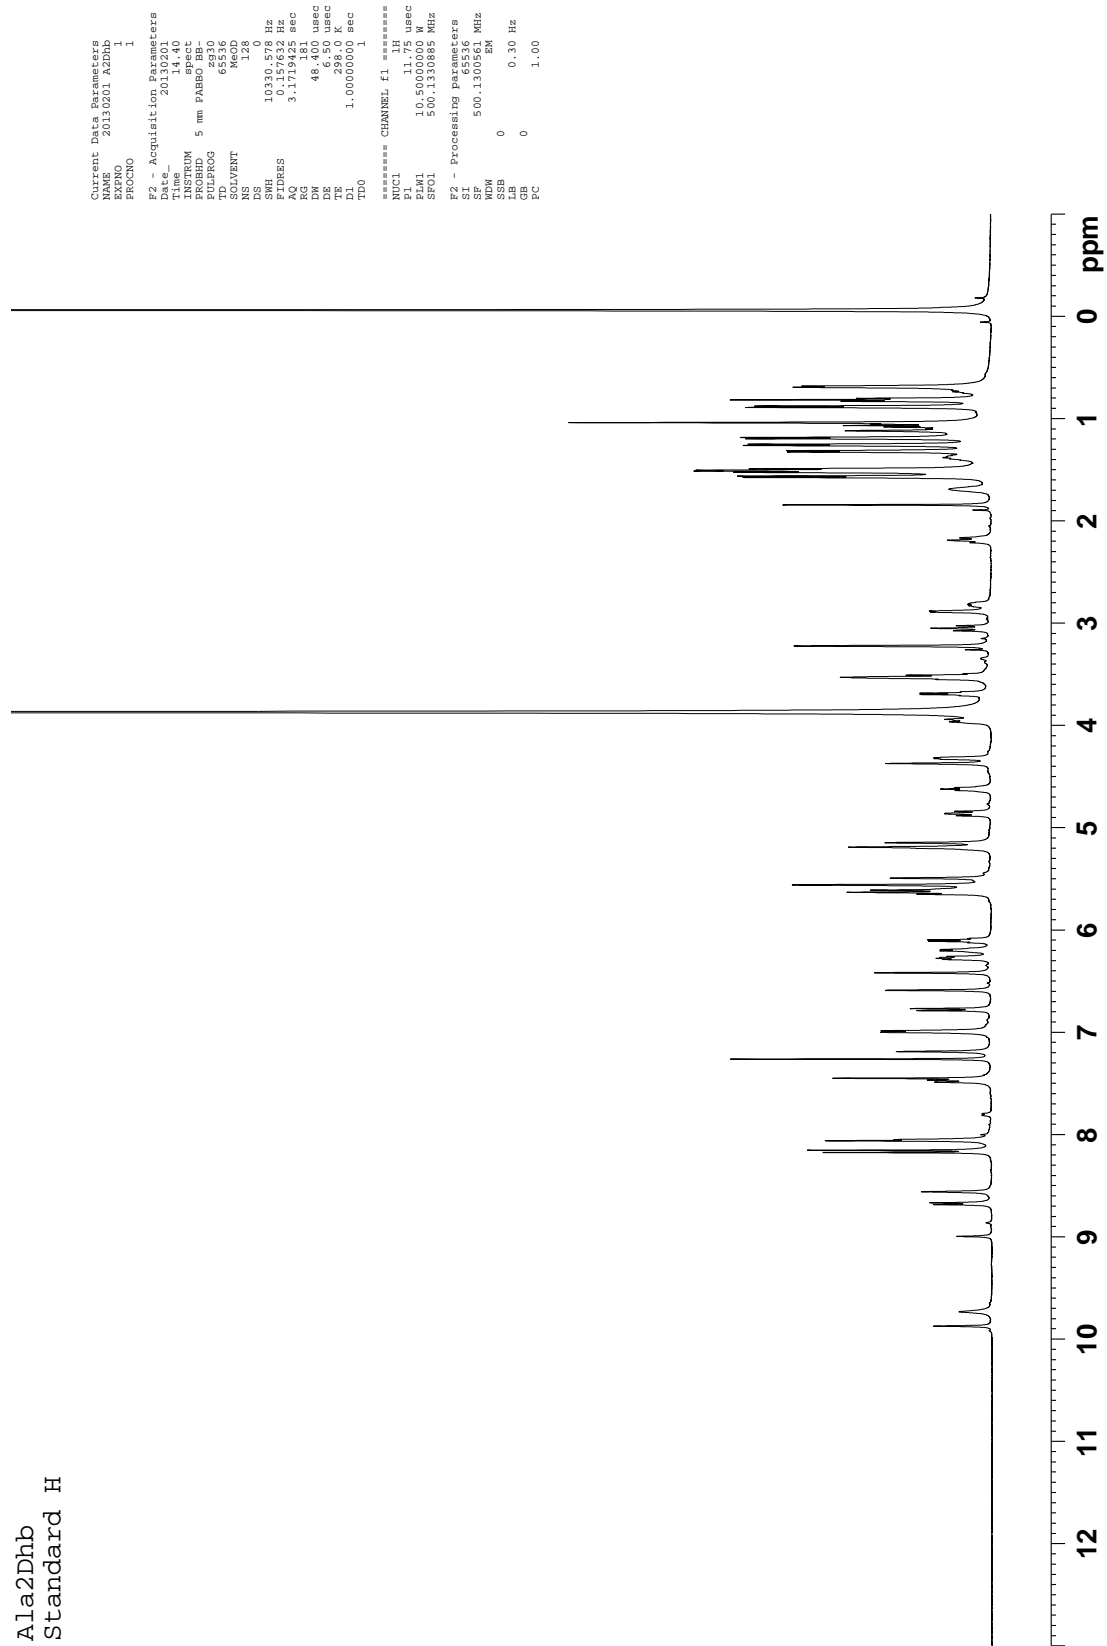

Figure S12. <sup>1</sup>H NMR spectrum of thiostrepton Ala2Dhb (500 MHz, CDCl<sub>3</sub>-CD<sub>3</sub>OD 4:1, 25 °C).



Ala2Dhb  
DEPT135

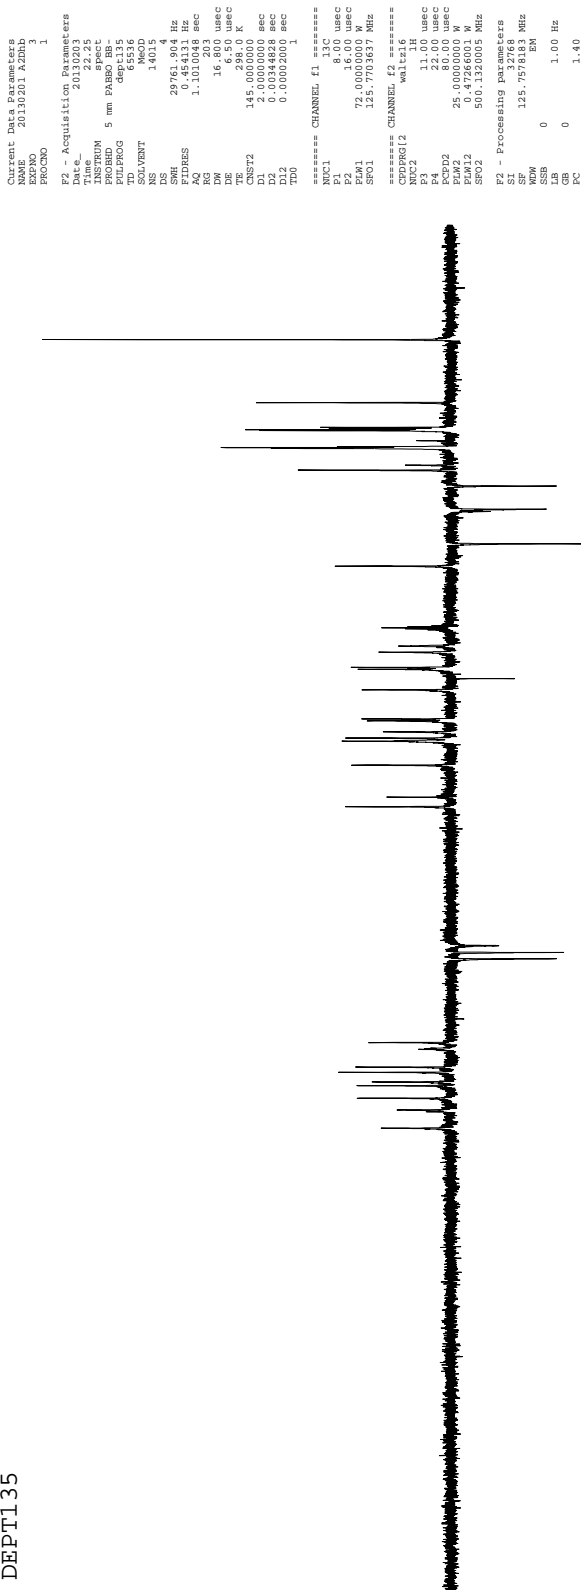

**Figure S14.** DEPT-135 NMR spectrum of thioStrepton Ala2Dhb (125 MHz, CDCl<sub>3</sub>-CD<sub>3</sub>OD 4:1, 25 °C).







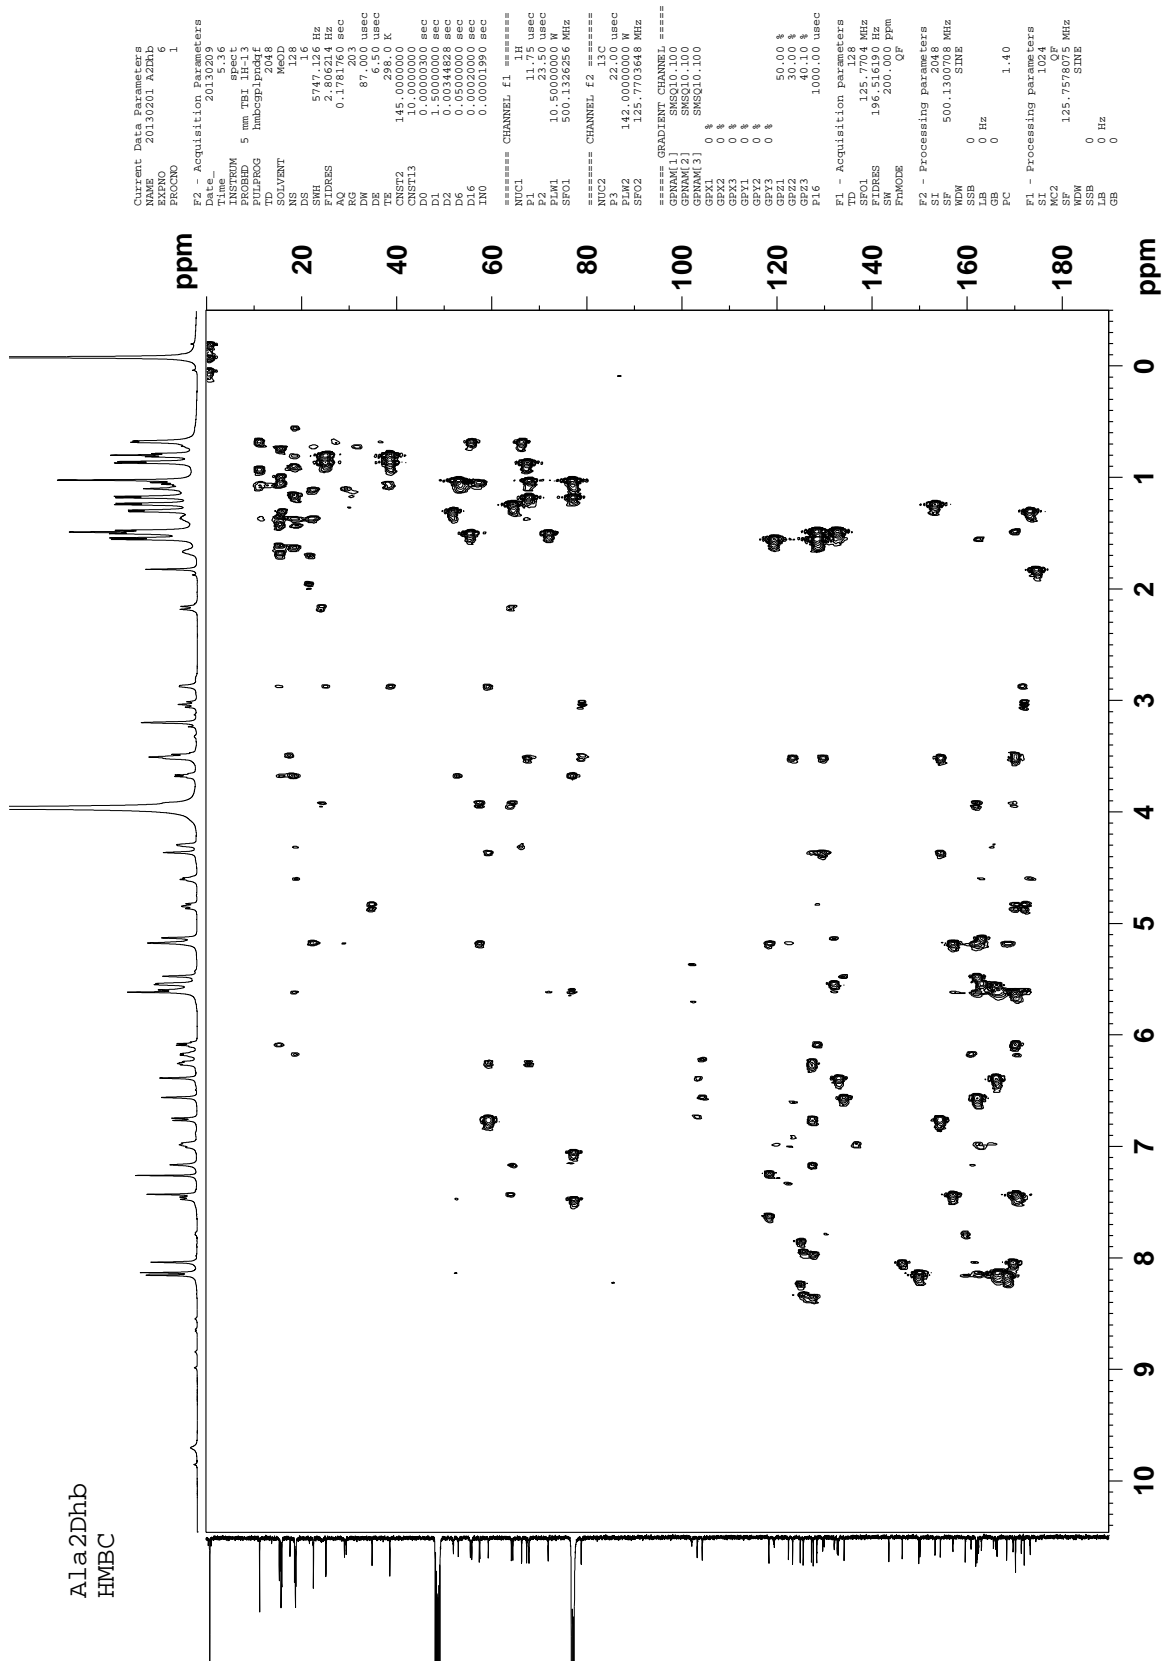

Figure S17. gHMBC spectrum of thioestrepton Ala2Dhb (500 MHz, CDCl<sub>3</sub>-CD<sub>3</sub>OD 4:1, 25 °C).

**Table S2.** <sup>1</sup>H and <sup>13</sup>C NMR assignments of thiostrepton Ala2Dhb

| Position              | $\delta_c$ [ppm];<br>mult | $\delta_H$ [ppm];<br>(mult, J in Hz)                              | HMBC <sup>a</sup>                                        | COSY <sup>b</sup>                                                                          |
|-----------------------|---------------------------|-------------------------------------------------------------------|----------------------------------------------------------|--------------------------------------------------------------------------------------------|
| <i>Ile1</i>           |                           |                                                                   |                                                          |                                                                                            |
| Ile1-1                | 171.3; C q                |                                                                   |                                                          |                                                                                            |
| Ile1-2                | 67.3; CH                  | 2.87 (d, 4.1)                                                     | Ile1-1; Ile1-3; Ile1-4; Ile1-6; Q-8                      | Ile1-3                                                                                     |
| Ile1-3                | 38.5; CH                  | 1.70-1.63 (m)                                                     | Ile1-6                                                   | Ile1-2; Ile1-4-H <sub>A</sub> ; Ile1-4-H <sub>B</sub> ; Ile1-6                             |
| Ile1-4                | 25.1; CH <sub>2</sub>     | H <sub>A</sub> : 1.41-1.33 (m)<br>H <sub>B</sub> : 1.12-1.07 (m)  | Ile1-2; Ile1-5; Ile1-6<br>Ile1-2; Ile1-3; Ile1-5; Ile1-6 | Ile1-3; Ile1-4-H <sub>B</sub> ; Ile1-5<br>Ile1-3; Ile1-4-H <sub>A</sub> ; Ile1-5           |
| Ile1-5                | 11.2; CH <sub>3</sub>     | 0.80 (t, 6.9)                                                     | Ile1-3; Ile1-4                                           | Ile1-4-H <sub>A</sub> ; Ile1-4-H <sub>B</sub>                                              |
| Ile1-6                | 15.3; CH <sub>3</sub>     | 0.86 (d, 6.7)                                                     | Ile1-2; Ile1-3; Ile1-4                                   | Ile1-3                                                                                     |
| <i>Dhb2</i>           |                           |                                                                   |                                                          |                                                                                            |
| Dhb2-1                | 162.1; C q                |                                                                   |                                                          |                                                                                            |
| Dhb2-2                | 128.4; C q                |                                                                   |                                                          |                                                                                            |
| Dhb2-3                | 119.4; CH                 | 5.64-5.60 (m)                                                     | Dhb2-1; Dhb2-4                                           | Dhb2-4                                                                                     |
| Dhb2-4                | 18.5; CH <sub>3</sub>     | 1.55 (d, 7.0)                                                     | Dhb2-1; Dhb2-2; Dhb2-3                                   | Dhb2-3                                                                                     |
| Dhb2-NH <sup>d</sup>  |                           | 7.02-6.94 (m)                                                     | Dha2-1; Dhb2-3                                           |                                                                                            |
| <i>Dha3</i>           |                           |                                                                   |                                                          |                                                                                            |
| Dha3-1                | 163.0; C q                |                                                                   |                                                          |                                                                                            |
| Dha3-2                | 132.0; C q                |                                                                   |                                                          |                                                                                            |
| Dha3-3                | 102.1; CH <sub>2</sub>    | H <sub>A</sub> : 5.54 (s)<br>H <sub>B</sub> : 5.13 (s)            | Dha3-1; Dha3-2<br>Dha3-1; Dha3-2                         | Dha3-3-H <sub>B</sub><br>Dha3-3-H <sub>A</sub>                                             |
| <i>Ala4</i>           |                           |                                                                   |                                                          |                                                                                            |
| Ala4-1                | 173.2; C q                |                                                                   |                                                          |                                                                                            |
| Ala4-2                | 51.9; CH                  | 4.60 (q, 6.0)                                                     | Dha3-1; Ala4-1; Ala4-3                                   | Ala4-3; Ala4-NH                                                                            |
| Ala4-3                | 18.8; CH <sub>3</sub>     | 1.30 (d, 6.2)                                                     | Ala4-1; Ala4-2                                           | Ala4-2                                                                                     |
| Ala4-NH <sup>d</sup>  |                           | 7.02-6.94 (m)                                                     |                                                          | Ala4-2                                                                                     |
| <i>Pip</i>            |                           |                                                                   |                                                          |                                                                                            |
| Pip-2                 | 161.9; C q                |                                                                   |                                                          |                                                                                            |
| Pip-3                 | 24.1; CH <sub>2</sub>     | H <sub>A</sub> : 3.34-3.30 (m)<br>H <sub>B</sub> : 2.83-2.76 (m)  |                                                          | Pip-4-H <sub>B</sub><br>Pip-4-H <sub>A</sub> ; Pip-4-H <sub>B</sub>                        |
| Pip-4                 | 29.0; CH <sub>2</sub>     | H <sub>A</sub> : 3.94-3.87 (m)<br>H <sub>B</sub> : 2.21-2.12 (m)  | Pip-2; Pip-3; Pip-5; Pip-6; Thz6-4<br>Pip-3; Pip-6       | Pip-4-H <sub>B</sub><br>Pip-3-H <sub>A</sub> ; Pip-3-H <sub>B</sub> ; Pip-4-H <sub>A</sub> |
| Pip-5                 | 57.5; C q                 |                                                                   |                                                          |                                                                                            |
| Pip-6                 | 64.1; CH                  | 5.17 (br s)                                                       | Pip-2; Pip-4; Pip-5; Thz13-2; Thz13-3; Thz15-4           | Pip-3-H <sub>B</sub>                                                                       |
| <i>Thz6</i>           |                           |                                                                   |                                                          |                                                                                            |
| Thz6-1                | 161.8; C q                |                                                                   |                                                          |                                                                                            |
| Thz6-2                | 146.3; C q                |                                                                   |                                                          |                                                                                            |
| Thz6-3                | 124.9; CH                 | 7.98 (s)                                                          | Thz6-1; Thz6-2; Thz6-4                                   |                                                                                            |
| Thz6-4                | 169.6; C q                |                                                                   |                                                          |                                                                                            |
| <i>Thr7</i>           |                           |                                                                   |                                                          |                                                                                            |
| Thr7-1                | 165.5; C q                |                                                                   |                                                          |                                                                                            |
| Thr7-2                | 55.8; CH                  | 4.32-4.27 (m)                                                     | Thr7-3; Thr7-4                                           | Thr7-3; Thr7-NH                                                                            |
| Thr7-3                | 66.3; CH                  | 1.52-1.45 (m)                                                     | Thr7-2                                                   | Thr7-4                                                                                     |
| Thr7-4                | 18.7; CH <sub>3</sub>     | 0.68 (d, 5.5)                                                     | Thr7-2; Thr7-3                                           | Thr7-3                                                                                     |
| Thr7-NH <sup>d</sup>  |                           | 7.02-6.94 (m)                                                     | Thr7-1                                                   | Thr7-2                                                                                     |
| <i>Dhb8</i>           |                           |                                                                   |                                                          |                                                                                            |
| Dhb8-2                | 128.4; C q                |                                                                   |                                                          |                                                                                            |
| Dhb8-3                | 132.6; CH                 | 6.08 (q, 6.6)                                                     | Dhb8-2; Dhb8-4; Tzn9-4                                   | Dhb8-4                                                                                     |
| Dhb8-4                | 15.3; CH <sub>3</sub>     | 1.48 (d, 7.8)                                                     | Dhb8-2; Dhb8-3; Tzn9-4                                   | Dhb8-3                                                                                     |
| <i>Tzn9</i>           |                           |                                                                   |                                                          |                                                                                            |
| Tzn9-1                | 172.0; C q                |                                                                   |                                                          |                                                                                            |
| Tzn9-2                | 78.8; CH                  | 4.84 (dd, 11.8, 9.8)                                              | Dhb8-2; Tzn9-1; Tzn9-3; Tzn9-4                           | Tzn9-3-H <sub>A</sub> ; Tzn9-3-H <sub>B</sub>                                              |
| Tzn9-3                | 34.8; CH <sub>2</sub>     | H <sub>A</sub> : 3.54-3.46 (m)<br>H <sub>B</sub> : 3.03 (t, 12.1) | Tzn9-2; Tzn9-4<br>Tzn9-1; Tzn9-2                         | Tzn9-2; Tzn9-3-H <sub>B</sub><br>Tzn9-2; Tzn9-3-H <sub>A</sub>                             |
| Tzn9-4                | 170.1; C q                |                                                                   |                                                          |                                                                                            |
| <i>Ile10</i>          |                           |                                                                   |                                                          |                                                                                            |
| Ile10-2               | 52.9; CH                  | 5.59 (s)                                                          | Ile10-3; Thz11-4                                         | Ile10-NH                                                                                   |
| Ile10-3               | 77.2 <sup>c</sup> ; C q   |                                                                   |                                                          |                                                                                            |
| Ile10-4               | 67.8; CH                  | 3.67 (q, 6.3)                                                     | Ile10-2; Ile10-3; Ile10-5; Ile10-6                       | Ile10-5                                                                                    |
| Ile10-5               | 15.7; CH <sub>3</sub>     | 1.17 (d, 6.2)                                                     | Ile10-3; Ile10-4; Ile10-6                                | Ile10-4                                                                                    |
| Ile10-6               | 18.5; CH <sub>3</sub>     | 1.02 (s)                                                          | Ile10-2; Ile10-3; Ile10-4                                |                                                                                            |
| Ile10-NH <sup>d</sup> |                           | 7.46 (d, 9.8)                                                     |                                                          | Ile10-2                                                                                    |

| Position              | $\delta_c$ [ppm];<br>mult | $\delta_H$ [ppm];<br>(mult, J in Hz)                   | HMBC <sup>a</sup>                    | COSY <sup>b</sup>                                |
|-----------------------|---------------------------|--------------------------------------------------------|--------------------------------------|--------------------------------------------------|
| <i>Thz11</i>          |                           |                                                        |                                      |                                                  |
| Thz11-1               | 162.4; C q                |                                                        |                                      |                                                  |
| Thz11-2               | 150.0; C q                |                                                        |                                      |                                                  |
| Thz11-3               | 125.5; CH                 | 8.13 (s)                                               | Thz11-1; Thz11-2; Thz11-4            |                                                  |
| Thz11-4               | 166.2; C q                |                                                        |                                      |                                                  |
| <i>Thr12</i>          |                           |                                                        |                                      |                                                  |
| Thr12-2               | 55.5; CH                  | 5.62 (s)                                               | Thr12-3; Thr12-4; Thz13-2; Thz13-4   | Thr12-3; Thr12-NH                                |
| Thr12-3               | 71.9; CH                  | 6.17 (q, 6.2)                                          | Thr12-4; Thz13-4; Q-1                | Thr12-4                                          |
| Thr12-4               | 18.7; CH <sub>3</sub>     | 1.49 (d, 7.4)                                          | Thr12-2; Thr12-3                     | Thr12-3                                          |
| Thr12-NH <sup>d</sup> |                           | 8.65 (d, 9.1)                                          |                                      | Thr12-2                                          |
| <i>Thz13</i>          |                           |                                                        |                                      |                                                  |
| Thz13-2               | 157.0; C q                |                                                        |                                      |                                                  |
| Thz13-3               | 118.3; CH                 | 7.43 (s)                                               | Pip-6; Thz13-2; Thz13-4              |                                                  |
| Thz13-4               | 170.1; C q                |                                                        |                                      |                                                  |
| <i>Thz15</i>          |                           |                                                        |                                      |                                                  |
| Thz15-1               | 159.6; C q                |                                                        |                                      |                                                  |
| Thz15-2               | 149.8; C q                |                                                        |                                      |                                                  |
| Thz15-3               | 127.6; CH                 | 8.15 (s)                                               | Thz15-1; Thz15-2; Thz15-4            |                                                  |
| Thz15-4               | 168.3; C q                |                                                        |                                      |                                                  |
| <i>Dha16</i>          |                           |                                                        |                                      |                                                  |
| Dha16-1               | 162.0; C q                |                                                        |                                      |                                                  |
| Dha16-2               | 134.0; C q                |                                                        |                                      |                                                  |
| Dha16-3               | 103.2; CH <sub>2</sub>    | H <sub>A</sub> : 6.56 (s)<br>H <sub>B</sub> : 5.47 (s) | Dha16-1; Dha16-2<br>Dha16-1; Dha16-2 | Dha16-3-H <sub>B</sub><br>Dha16-3-H <sub>A</sub> |
| <i>Dha17</i>          |                           |                                                        |                                      |                                                  |
| Dha17-1               | 166.0; C q                |                                                        |                                      |                                                  |
| Dha17-2               | 132.8; C q                |                                                        |                                      |                                                  |
| Dha17-3               | 104.3; CH <sub>2</sub>    | H <sub>A</sub> : 6.39 (s)<br>H <sub>B</sub> : 5.55 (s) | Dha17-1; Dha17-2<br>Dha17-1; Dha17-2 | Dha17-3-H <sub>B</sub><br>Dha17-3-H <sub>A</sub> |
| <i>Q</i>              |                           |                                                        |                                      |                                                  |
| Q-1                   | 160.8; C q                |                                                        |                                      |                                                  |
| Q-2                   | 143.5; C q                |                                                        |                                      |                                                  |
| Q-3                   | 122.4; CH                 | 7.16 (s)                                               | Q-1; Q-5; Q-11                       |                                                  |
| Q-4                   | 153.2; C q                |                                                        |                                      |                                                  |
| Q-5                   | 127.3; C q                |                                                        |                                      |                                                  |
| Q-6                   | 123.3; CH                 | 6.76 (d, 9.9)                                          | Q-5; Q-8; Q-10                       | Q-7                                              |
| Q-7                   | 129.6; CH                 | 6.25 (dd, 9.0, 5.8)                                    | Q-5; Q-8; Q-9                        | Q-6; Q-8; Q-9                                    |
| Q-8                   | 59.2; CH                  | 3.54-3.46 (m)                                          | Ile1-2; Q-6; Q-7; Q-9; Q-10          | Q-7; Q-9                                         |
| Q-9                   | 67.7; CH                  | 4.36 (s)                                               | Q-5; Q-7; Q-8; Q-10                  | Q-7; Q-8                                         |
| Q-10                  | 154.3; C q                |                                                        |                                      |                                                  |
| Q-11                  | 64.4; CH                  | 5.17 (br s)                                            | Q-3; Q-12                            | Q-12                                             |
| Q-12                  | 22.5; CH <sub>3</sub>     | 1.24 (d, 6.4)                                          | Q-4; Q-11                            | Q-11                                             |

<sup>a</sup> HMBC correlations are from the proton to the indicated carbon.

<sup>b</sup> COSY correlations are from the proton to the proton attached to the indicated position.

<sup>c</sup> The  $\delta$  of this resonance was determined by HMBC due to overlap with the CDCl<sub>3</sub> resonance.

<sup>d</sup> Only those amide resonances demonstrating either HMBC or COSY correlations to neighboring carbons or protons, respectively, were assigned.

**Figure S18.** MS analysis of thiostrepton Ala2Ile- $\Delta$ Ile1 isolated from *S. laurentii* NDS1/int-A2I.

(A) HPLC-MS analysis. (1) Chromatogram extracted for  $m/z$  797.2, the calculated  $[M+2H]^{2+}$  ion of thiostrepton Ala2Ile- $\Delta$ Ile1. (2) Total ion chromatogram.

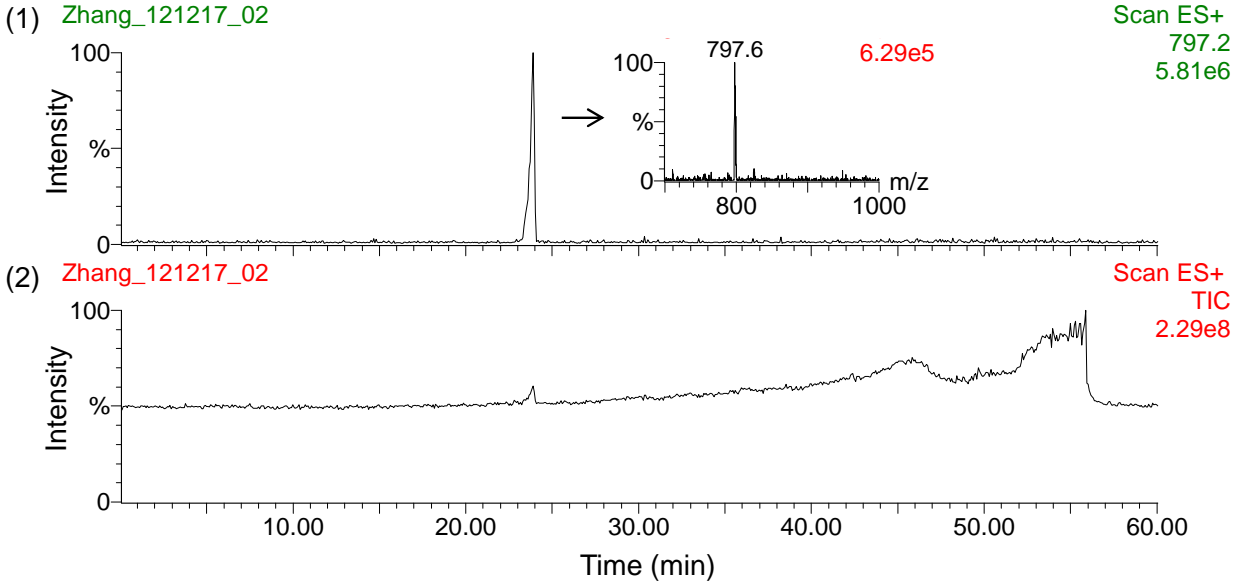

(B) MALDI MS spectrum of thiostrepton Ala2Ile- $\Delta$ Ile1.

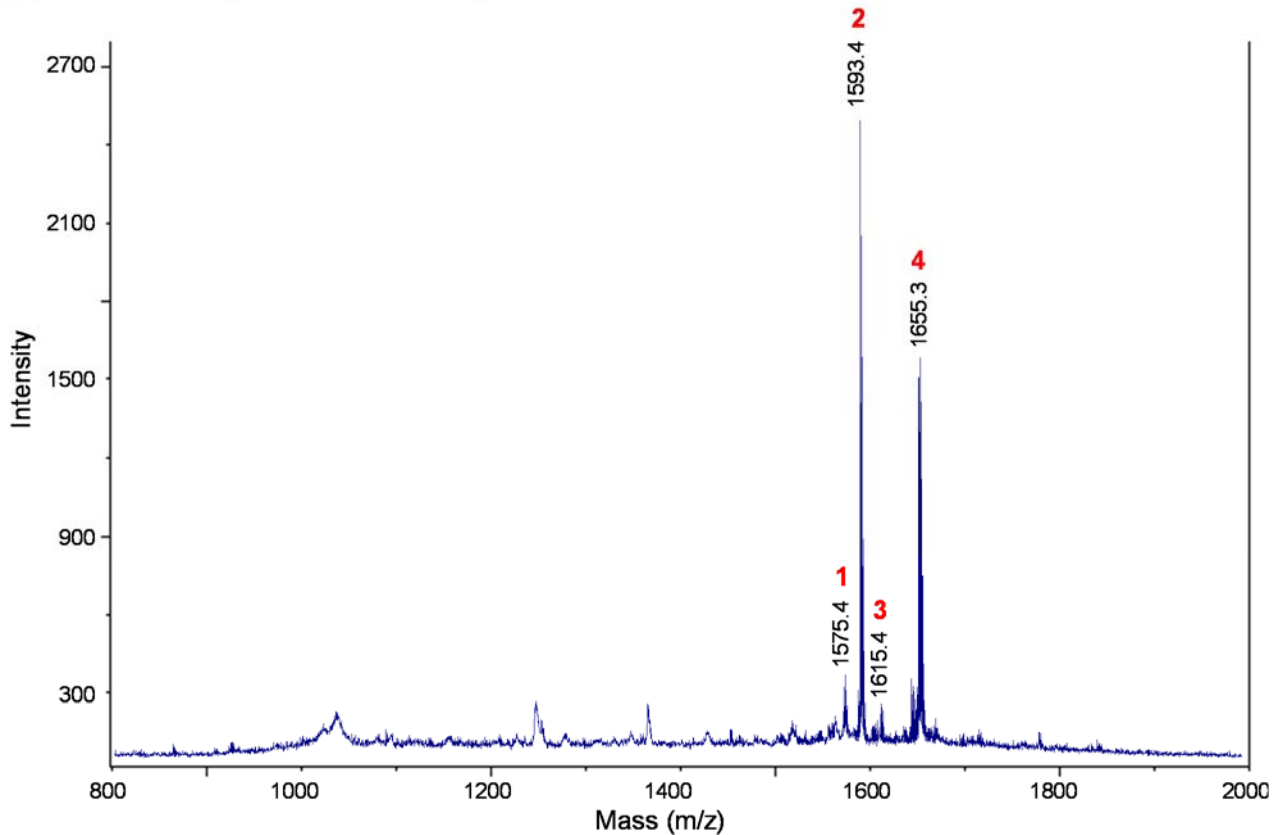

(C) MALDI MS/MS of parent ion  $m/z$  1593.4.

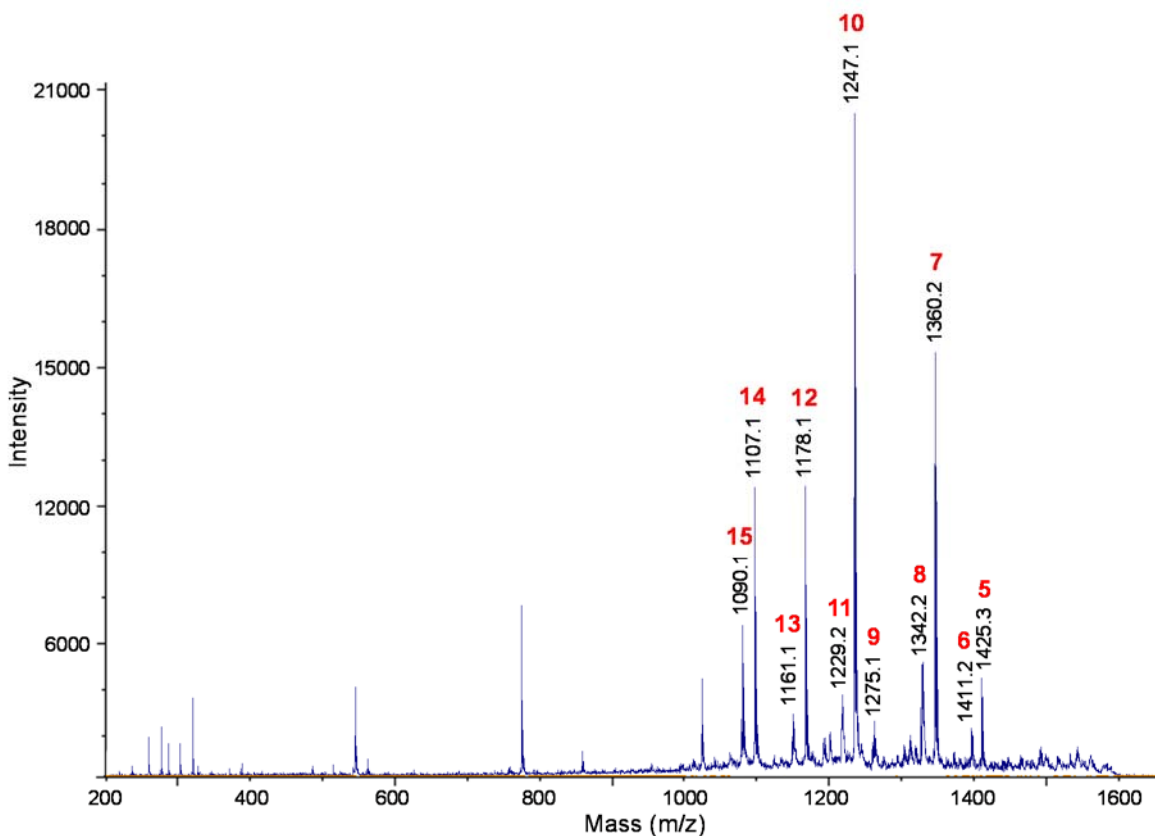

(D) Table and structure showing key ions and fragments in the MALDI MS and MS/MS of thiostrepton Ala2Ile- $\Delta$ Ile1.

| Fragment                                      | Expected | Observed |
|-----------------------------------------------|----------|----------|
| 1. M-H <sub>2</sub> O+H <sup>+</sup>          | 1575.5   | 1575.4   |
| 2. M+H <sup>+</sup> (Parent ion)              | 1593.5   | 1593.4   |
| 3. M+Na <sup>+</sup>                          | 1615.4   | 1615.4   |
| 4. M+Cu <sup>+</sup>                          | 1655.4   | 1655.3   |
| 5. M-Dhb8-Tzn9+H <sup>+</sup>                 | 1425.4   | 1425.3   |
| 6. M-Ile2-Dha3+H <sup>+</sup>                 | 1411.4   | 1411.2   |
| 7. M-QA+H <sup>+</sup>                        | 1360.4   | 1360.2   |
| 8. M-QA-H <sub>2</sub> O+H <sup>+</sup>       | 1342.4   | 1342.2   |
| 9. M-QA-(Ile2-CO)+H <sup>+</sup>              | 1275.3   | 1275.1   |
| 10. M-QA-Ile2+H <sup>+</sup>                  | 1247.3   | 1247.1   |
| 11. M-QA-Ile2-H <sub>2</sub> O+H <sup>+</sup> | 1229.3   | 1229.2   |
| 12. M-QA-Ile2-Dha3+H <sup>+</sup>             | 1178.3   | 1178.1   |
| 13. M-QA-Ile2-Dha3-OH+H <sup>+</sup>          | 1161.3   | 1161.1   |
| 14. M-QA-Ile2-Dha3-Ala4+H <sup>+</sup>        | 1107.3   | 1107.1   |
| 15. M-QA-Ile2-Dha3-Ala4-OH+H <sup>+</sup>     | 1090.2   | 1090.1   |

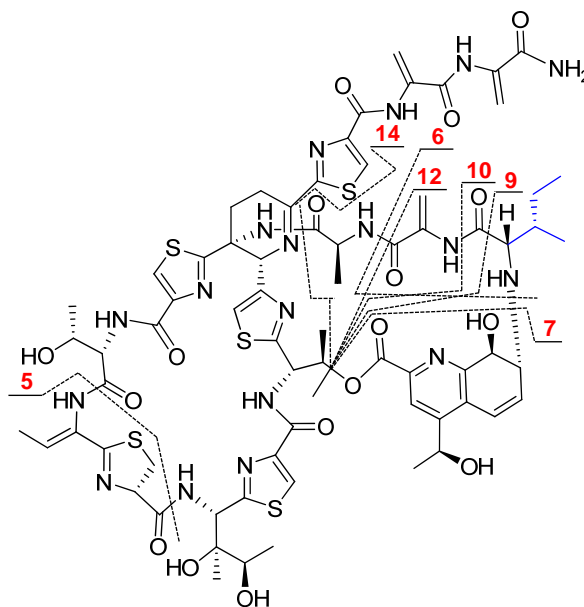

**Figure S19.** Structure and numbering system used for thiostrepton Ala2Ile-ΔIle1.

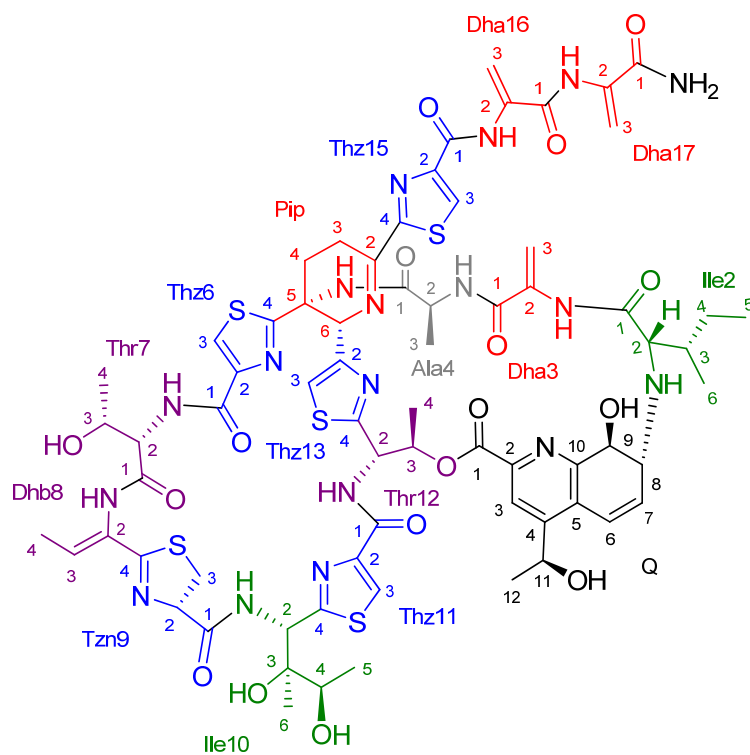

Ala2Ile-Ile1  
Standard H

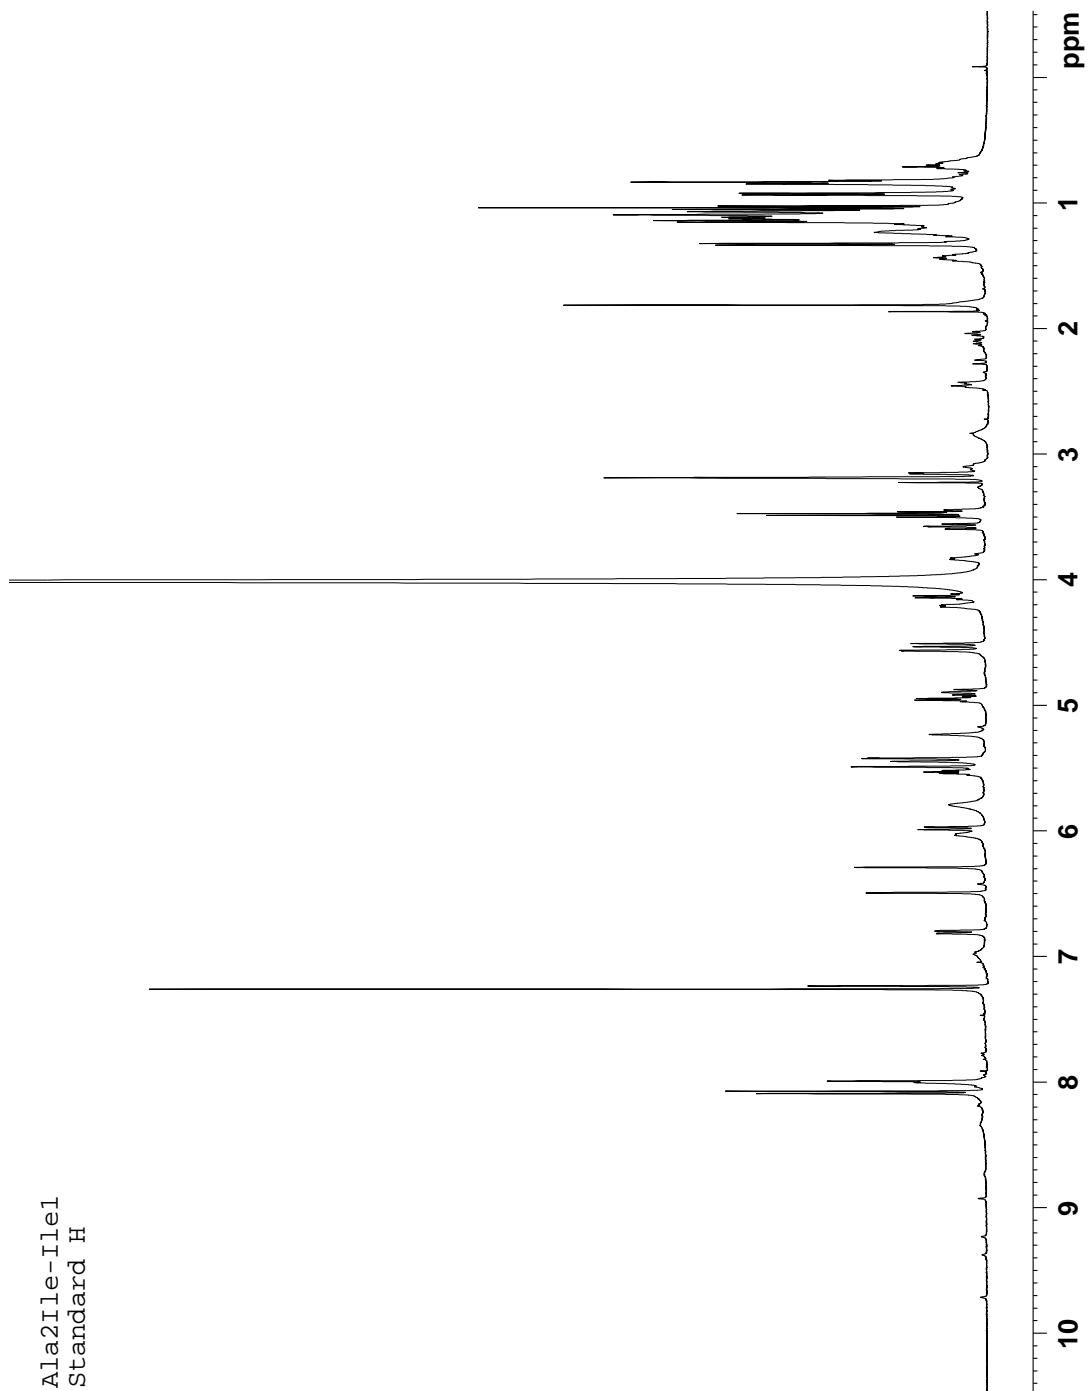

```

Current Data Parameters
NAME      20130406_A21-I1
EXPNO     1
PROCNO    1

F2 - Acquisition Parameters
File      20130406
Time      16.15
INSTRUM   spect
PROBHD    5 mm PABBOBO-1
PULPROG   zgpg30
TD         65536
SOLVENT   MeOD
NS         1280
DS         4
SWH        5498.534 Hz
FIDRES     0.5554069 Hz
AQ          0.203 sec
RG          203
DM          90.933 usec
DE          2.00 usec
TE          298.0 K
D1          1.00000000 sec
TD0         1

===== CHANNEL f1 =====
NUC1       1H
P1          11.00 usec
PL1         0.0000000 W
SFO1        500.1322572 MHz

F2 - Processing parameters
SI          65536
SF          500.1300723 MHz
WDW         EM
SSB         0
LB          0.30 Hz
GB          0
PC          1.00
  
```

**Figure S20.**  $^1\text{H}$  NMR spectrum of thiostrepton Ala2Ile- $\Delta$ Ile1 (500 MHz,  $\text{CDCl}_3$ - $\text{CD}_3\text{OD}$  4:1, 25  $^\circ\text{C}$ ).

Ala2Ile-Ile1  
Standard C13

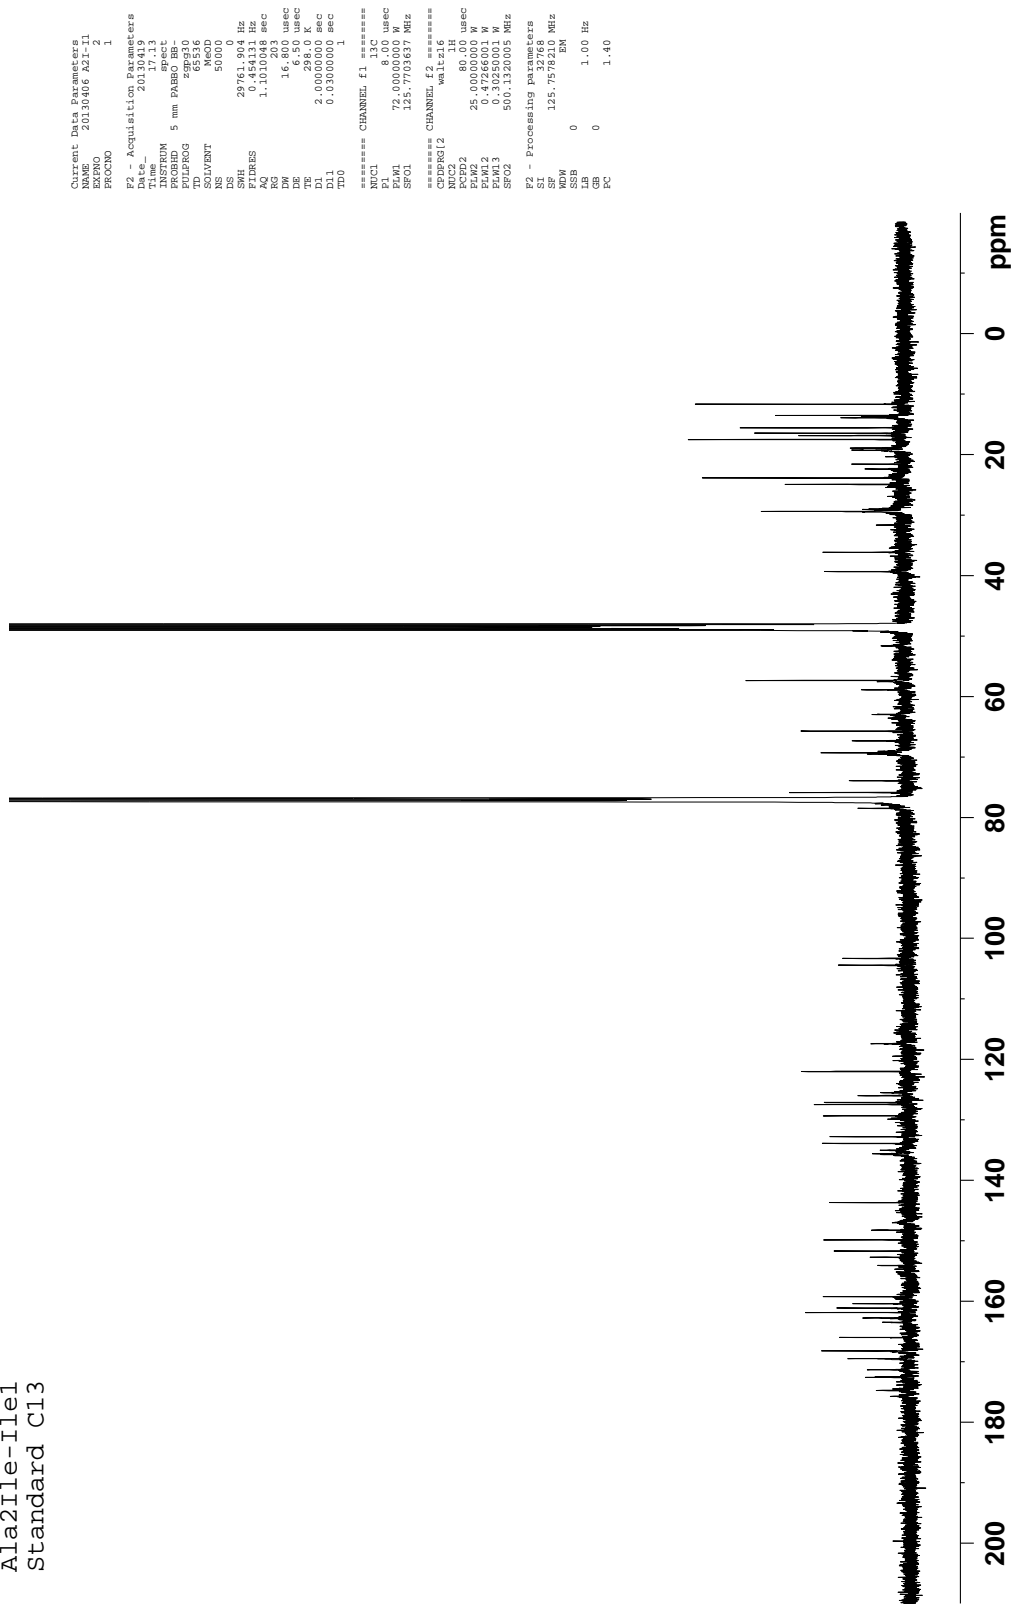

**Figure S21.**  $^{13}\text{C}$  NMR spectrum of thioStrepton Ala2Ile- $\Delta$ Ile1 (125 MHz,  $\text{CDCl}_3$ - $\text{CD}_3\text{OD}$  4:1, 25  $^\circ\text{C}$ ).



Ala2Ile-Ile1  
DEPT135

```
Current Data Parameters
EXPNO 3
PROCNO 1
F2 - Acquisition Parameters
Date_ 20130421
Time 17.06
INSTRUM spect
PROBHD 5 mm PABBO BB-
PULPROG zgpg30
SOLVENT dms
NS 20743
DSH 29761.904 Hz
AQ 1.1010048 sec
RG 2048
DM 16.800 usec
DE 6.50 usec
TE 295.0 K
D1 145.0000000 sec
D11 2.0000000 sec
D2 0.00344828 sec
D3 0.000200000 sec
TD0 1
===== CHANNEL f1 =====
NUC1 13C
P1 8.00 usec
P2 16.00 usec
SFO1 125.7703637 MHz
===== CHANNEL f2 =====
CPDPRG2 waltz16
NUC2 1H
P3 11.00 usec
PCPD2 80.00 usec
ELP2 25.00000000 M
SFO2 500.1320005 MHz
F2 - Processing parameters
SF 125.7578222 MHz
WDW EM
GB 0
PC 1.40
```

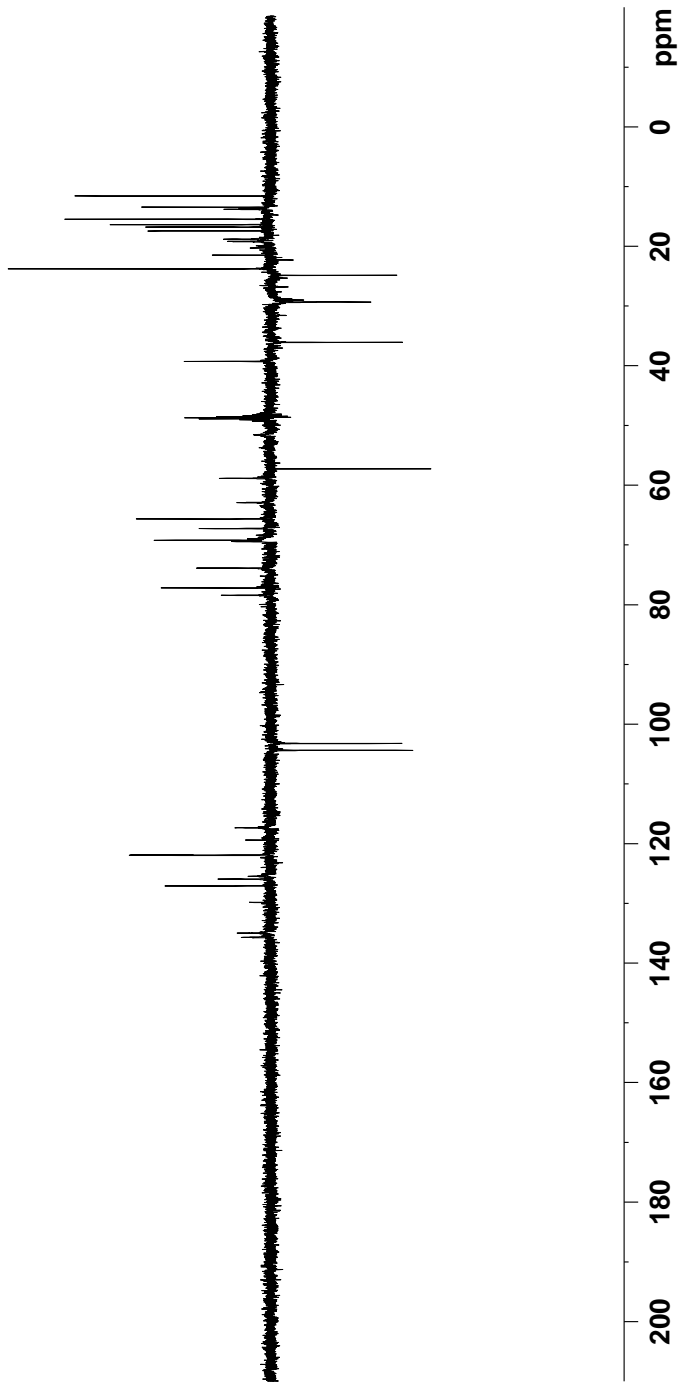

**Figure S22.** DEPT-135 NMR spectrum of thiostrepton Ala2Ile-Ile1 (125 MHz,  $\text{CDCl}_3\text{-CD}_3\text{OD}$  4:1, 25 °C).

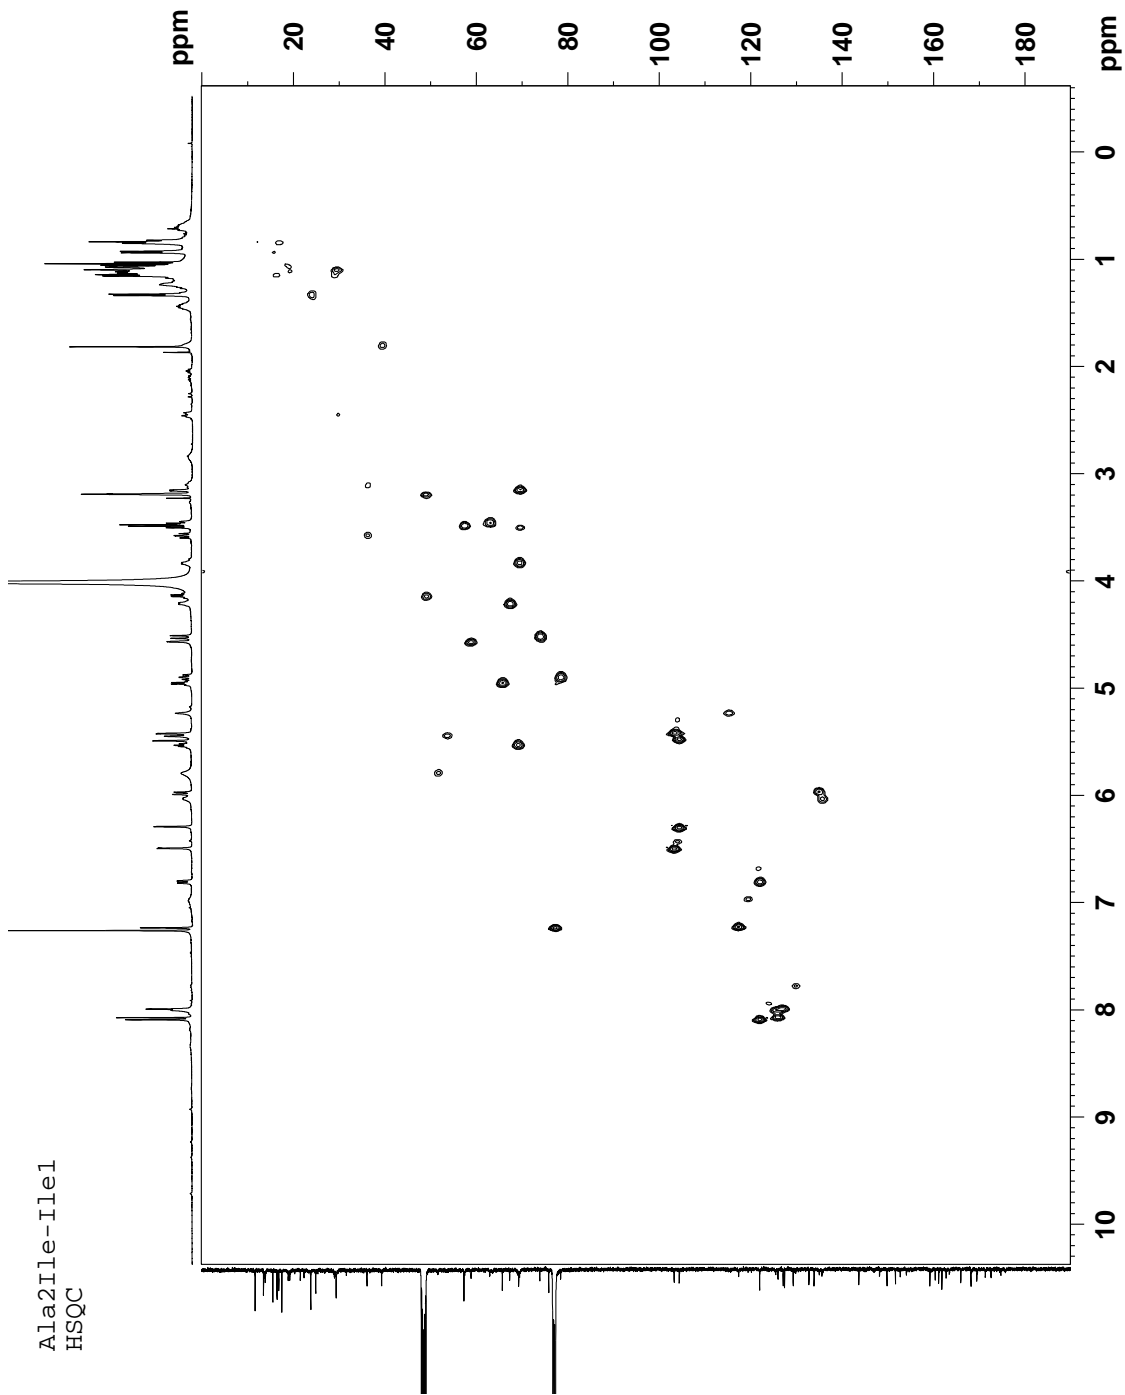

**Figure S23.** gHSQC NMR spectrum of thiostrepton Ala2Ile-Ile1 (500 MHz, CDCl<sub>3</sub>-CD<sub>3</sub>OD 4:1, 25 °C).

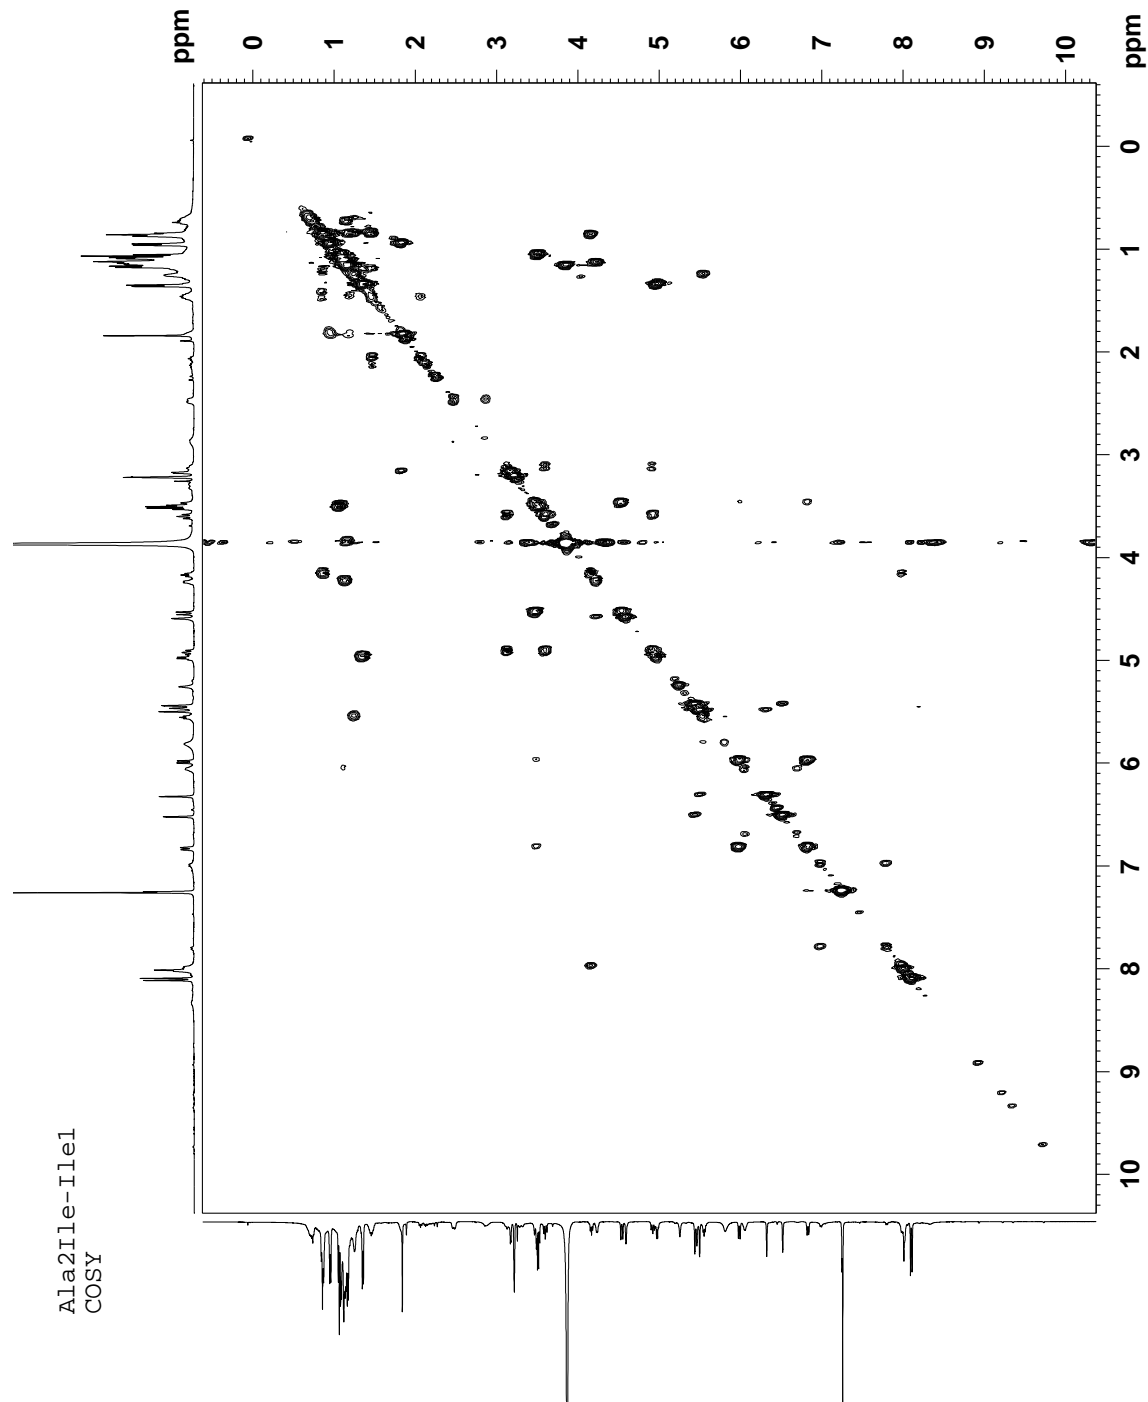

**Figure S24.** gCOSY NMR spectrum of thiostrepton Ala2Ile-Ile1 (125 MHz, CDCl<sub>3</sub>-CD<sub>3</sub>OD 4:1, 25 °C).

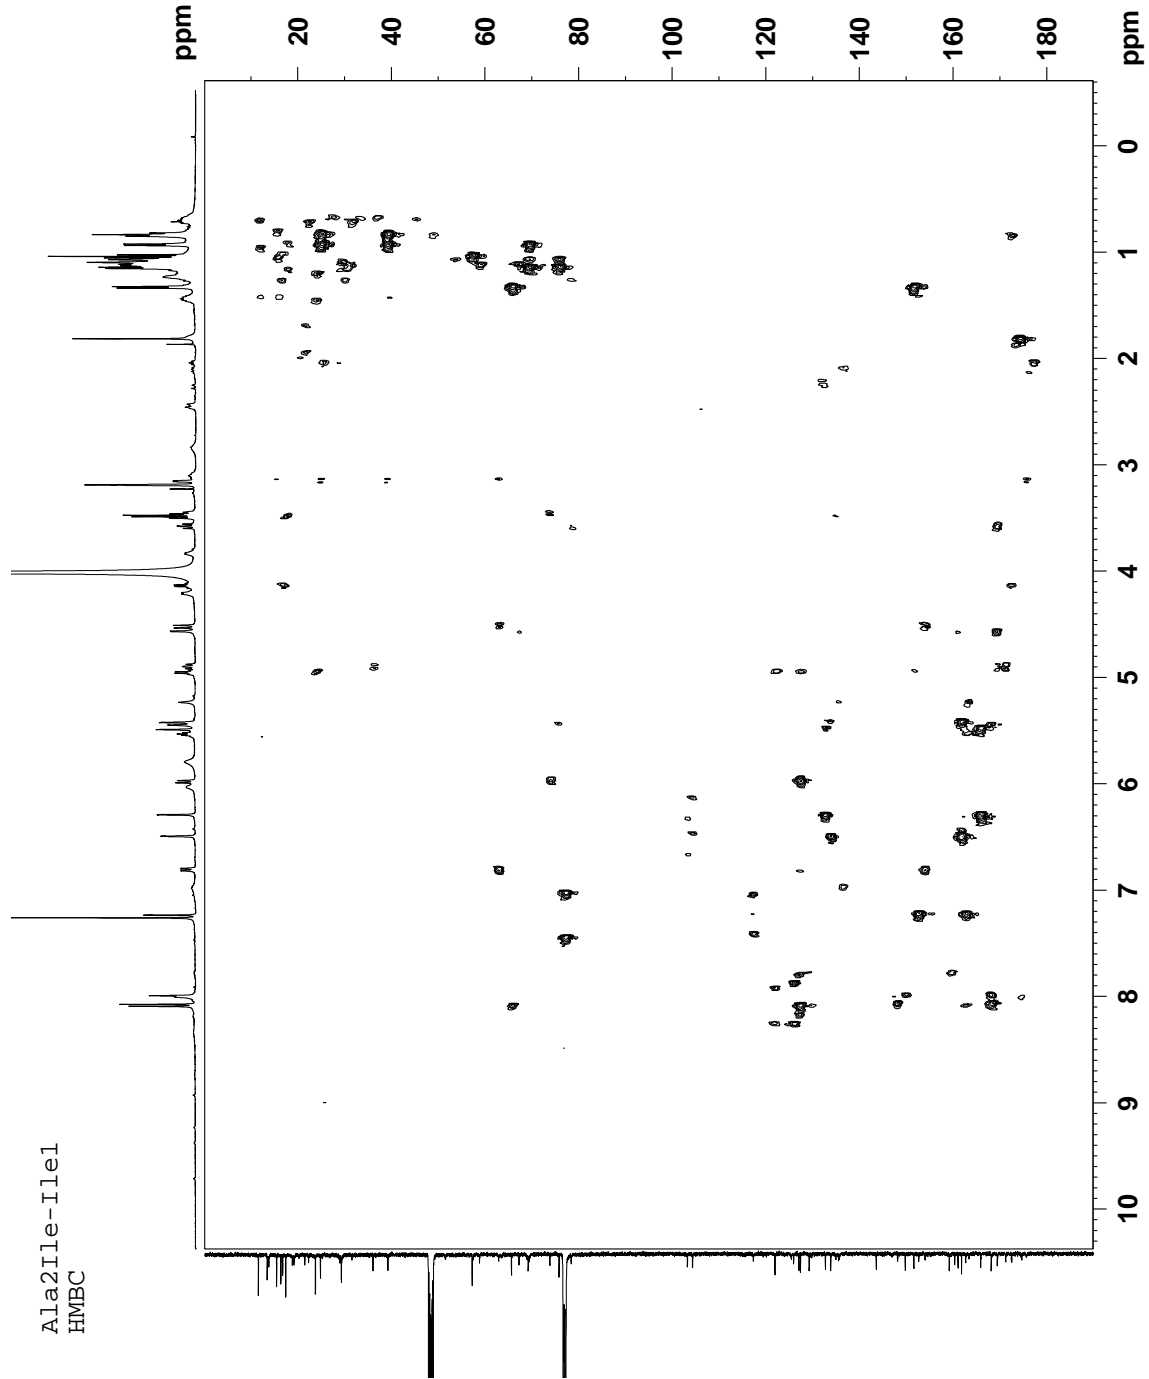

**Figure S25.** gHMBC NMR spectrum of thiostrepton Ala2Ile- $\Delta$ Ile1 (125 MHz,  $\text{CDCl}_3$ - $\text{CD}_3\text{OD}$  4:1, 25 °C).

**Table S3.**  $^1\text{H}$  and  $^{13}\text{C}$  NMR assignments of thiostrepton Ala2Ile- $\Delta$ Ile1

| Position     | $\delta_{\text{C}}$ [ppm];<br>mult | $\delta_{\text{H}}$ [ppm];<br>(mult, J in Hz)                            | HMBC <sup>a</sup>                                        | COSY <sup>b</sup>                                                   |
|--------------|------------------------------------|--------------------------------------------------------------------------|----------------------------------------------------------|---------------------------------------------------------------------|
| <i>Ile2</i>  |                                    |                                                                          |                                                          |                                                                     |
| Ile2-1       | 174.7; C q                         |                                                                          |                                                          |                                                                     |
| Ile2-2       | 69.4; CH                           | 3.15 (d, 3.8)                                                            | Ile2-3; Ile2-4; Ile2-6                                   | Ile2-3                                                              |
| Ile2-3       | 39.3; CH                           | 1.82-1.78 (m)                                                            | Ile2-1                                                   | Ile2-2; Ile2-4-H <sub>A</sub> ; Ile2-4-H <sub>B</sub> ; Ile2-6      |
| Ile2-4       | 24.9; CH <sub>2</sub>              | H <sub>A</sub> : 1.48-1.39 (m)<br>H <sub>B</sub> : 1.21-1.16 (m)         | Ile2-3; Ile2-5; Ile2-6                                   | Ile2-3; Ile2-4-H <sub>B</sub> ; Ile2-5                              |
| Ile2-5       | 11.6; CH <sub>3</sub>              | 0.83 (t, 7.3)                                                            | Ile2-2                                                   | Ile2-3; Ile2-4-H <sub>A</sub> ; Ile2-5                              |
| Ile2-6       | 15.5; CH <sub>3</sub>              | 0.93 (d, 6.9)                                                            | Ile2-3; Ile2-4; Ile2-6<br>Ile2-2; Ile2-3; Ile2-4; Ile2-5 | Ile2-4-H <sub>A</sub> ; Ile2-4-H <sub>B</sub><br>Ile2-3             |
| <i>Dha3</i>  |                                    |                                                                          |                                                          |                                                                     |
| Dha3-1       | 163.4; C q                         |                                                                          |                                                          |                                                                     |
| Dha3-2       | 135.6; C q                         |                                                                          |                                                          |                                                                     |
| Dha3-3       | 115.2; CH <sub>2</sub>             | H <sub>A</sub> : 5.79 (br s)<br>H <sub>B</sub> : 5.23 (br s)             | Dha3-1; Dha3-2                                           |                                                                     |
| <i>Ala4</i>  |                                    |                                                                          |                                                          |                                                                     |
| Ala4-1       | 172.5; C q                         |                                                                          |                                                          |                                                                     |
| Ala4-2       | 49.3; CH                           | 4.14 (q, 7.4)                                                            | Ala4-1; Ala4-3                                           | Ala4-3                                                              |
| Ala4-3       | 16.8; CH <sub>3</sub>              | 0.84 (d, 7.3)                                                            | Ala4-1; Ala4-2                                           | Ala4-2                                                              |
| <i>Pip</i>   |                                    |                                                                          |                                                          |                                                                     |
| Pip-2        | 159.2; C q                         |                                                                          |                                                          |                                                                     |
| Pip-3        | 22.3; CH <sub>2</sub>              | H <sub>A</sub> : 3.50-3.40 (m)<br>H <sub>B</sub> : 2.89-2.80 (m)         |                                                          | Pip-3-H <sub>B</sub> ; Pip-4-H <sub>B</sub><br>Pip-4-H <sub>B</sub> |
| Pip-4        | 29.3; CH <sub>2</sub>              | H <sub>A</sub> : 3.86-3.80 (m)<br>H <sub>B</sub> : 2.48-2.42 (m)         |                                                          | Pip-3-H <sub>A</sub> ; Pip-3-H <sub>B</sub>                         |
| Pip-5        | 57.5; C q                          |                                                                          |                                                          |                                                                     |
| Pip-6        | 63.6; CH                           | 5.23 (br s)                                                              |                                                          |                                                                     |
| <i>Thz6</i>  |                                    |                                                                          |                                                          |                                                                     |
| Thz6-1       | 161.1; C q                         |                                                                          |                                                          |                                                                     |
| Thz6-2       | 149.8; C q                         |                                                                          |                                                          |                                                                     |
| Thz6-3       | 127.1; CH                          | 7.99 (s)                                                                 | Thz6-2; Thz6-4                                           |                                                                     |
| Thz6-4       | 168.2; C q                         |                                                                          |                                                          |                                                                     |
| <i>Thr7</i>  |                                    |                                                                          |                                                          |                                                                     |
| Thr7-1       | 169.5; C q                         |                                                                          |                                                          |                                                                     |
| Thr7-2       | 58.8; CH                           | 4.56 (d, 2.0)                                                            | Thz6-1; Thr7-1; Thr7-3                                   | Thr7-3                                                              |
| Thr7-3       | 67.3; CH                           | 4.23-4.18 (m)                                                            |                                                          | Thr7-2; Thr7-4                                                      |
| Thr7-4       | 19.2; CH <sub>3</sub>              | 1.12 (d, 6.0)                                                            | Thr7-2; Thr7-3                                           | Thr7-3                                                              |
| <i>Dhb8</i>  |                                    |                                                                          |                                                          |                                                                     |
| Dhb8-2       | 127.4; C q                         |                                                                          |                                                          |                                                                     |
| Dhb8-3       | 135.7; CH                          | 6.08-6.03 (m)                                                            | Dhb8-2                                                   | Dhb8-4                                                              |
| Dhb8-4       | 19.2; CH <sub>3</sub>              | 1.13-1.09 (m)                                                            |                                                          |                                                                     |
| <i>Tzn9</i>  |                                    |                                                                          |                                                          |                                                                     |
| Tzn9-1       | 171.3; C q                         |                                                                          |                                                          |                                                                     |
| Tzn9-2       | 78.4; CH                           | 4.90 (dd, 11.4, 9.8)                                                     | Tzn9-1; Tzn9-3; Tzn9-4                                   | Tzn9-3-H <sub>A</sub> ; Tzn9-3-H <sub>B</sub>                       |
| Tzn9-3       | 36.1; CH <sub>2</sub>              | H <sub>A</sub> : 3.58 (dd, 11.1, 9.2)<br>H <sub>B</sub> : 3.10 (t, 12.0) | Tzn9-2; Tzn9-4                                           | Tzn9-2; Tzn9-3-H <sub>B</sub><br>Tzn9-2; Tzn9-3-H <sub>A</sub>      |
| Tzn9-4       | 169.5; C q                         |                                                                          |                                                          |                                                                     |
| <i>Ile10</i> |                                    |                                                                          |                                                          |                                                                     |
| Ile10-2      | 53.7; CH                           | 5.45 (s)                                                                 | Ile10-3; Thz11-4                                         |                                                                     |
| Ile10-3      | 75.8; C q                          |                                                                          |                                                          |                                                                     |
| Ile10-4      | 69.3; CH                           | 3.86-3.80 (m)                                                            |                                                          | Ile10-5                                                             |
| Ile10-5      | 16.4; CH <sub>3</sub>              | 1.15 (d, 6.5)                                                            | Ile10-3; Ile10-4                                         | Ile10-4                                                             |
| Ile10-6      | 18.8; CH <sub>3</sub>              | 1.07 (s)                                                                 | Ile10-2; Ile10-3; Ile10-4; Ile10-5                       |                                                                     |
| <i>Thz11</i> |                                    |                                                                          |                                                          |                                                                     |
| Thz11-1      | 162.7; C q                         |                                                                          |                                                          |                                                                     |
| Thz11-2      | 149.8; C q                         |                                                                          |                                                          |                                                                     |
| Thz11-3      | 121.9; CH                          | 8.09 (s)                                                                 | Thz11-1; Thz11-4                                         |                                                                     |
| Thz11-4      | 168.3; C q                         |                                                                          |                                                          |                                                                     |
| <i>Thr12</i> |                                    |                                                                          |                                                          |                                                                     |
| Thr12-2      | 51.6; CH                           | 5.79 (br s)                                                              |                                                          | Thr12-3                                                             |
| Thr12-3      | 69.3; CH                           | 5.53 (pentet, 6.1)                                                       | Q-1                                                      | Thr12-2; Thr12-4                                                    |
| Thr12-4      | 13.8; CH <sub>3</sub>              | 1.26-1.21 (m)                                                            |                                                          | Thr12-3                                                             |

| Position     | $\delta_C$ [ppm];<br>mult | $\delta_H$ [ppm];<br>(mult, J in Hz)                             | HMBC <sup>a</sup>                    | COSY <sup>b</sup>                                |
|--------------|---------------------------|------------------------------------------------------------------|--------------------------------------|--------------------------------------------------|
| <i>Thz13</i> |                           |                                                                  |                                      |                                                  |
| Thz13-2      | 159.2; C q                |                                                                  |                                      |                                                  |
| Thz13-3      | 125.5; CH                 | 8.00 (s)                                                         | Thz13-4                              |                                                  |
| Thz13-4      | 168.2; C q                |                                                                  |                                      |                                                  |
| <i>Thz15</i> |                           |                                                                  |                                      |                                                  |
| Thz15-1      | 160.4; C q                |                                                                  |                                      |                                                  |
| Thz15-2      | 148.2; C q                |                                                                  |                                      |                                                  |
| Thz15-3      | 126.0; CH                 | 8.07 (s)                                                         | Thz15-2; Thz15-4                     |                                                  |
| Thz15-4      | 168.3; C q                |                                                                  |                                      |                                                  |
| <i>Dha16</i> |                           |                                                                  |                                      |                                                  |
| Dha16-1      | 161.8; C q                |                                                                  |                                      |                                                  |
| Dha16-2      | 133.9; C q                |                                                                  |                                      |                                                  |
| Dha16-3      | 103.2; CH <sub>2</sub>    | H <sub>A</sub> : 6.49 (d, 2.2)<br>H <sub>B</sub> : 5.42 (d, 2.1) | Dha16-1; Dha16-2<br>Dha16-1; Dha16-2 | Dha16-3-H <sub>B</sub><br>Dha16-3-H <sub>A</sub> |
| <i>Dha17</i> |                           |                                                                  |                                      |                                                  |
| Dha17-1      | 165.9; C q                |                                                                  |                                      |                                                  |
| Dha17-2      | 132.7; C q                |                                                                  |                                      |                                                  |
| Dha17-3      | 104.4; CH <sub>2</sub>    | H <sub>A</sub> : 6.29 (d, 1.4)<br>H <sub>B</sub> : 5.49 (d, 1.3) | Dha17-1; Dha17-2<br>Dha17-1; Dha17-2 | Dha17-3-H <sub>B</sub><br>Dha17-3-H <sub>A</sub> |
| <i>Q</i>     |                           |                                                                  |                                      |                                                  |
| Q-1          | 162.7; C q                |                                                                  |                                      |                                                  |
| Q-2          | 152.7; C q                |                                                                  |                                      |                                                  |
| Q-3          | 117.4; CH                 | 7.23 (s)                                                         | Q-1; Q-2; Q-10                       |                                                  |
| Q-4          | 151.7; C q                |                                                                  |                                      |                                                  |
| Q-5          | 127.4; C q                |                                                                  |                                      |                                                  |
| Q-6          | 122.0; CH                 | 6.81 (dd, 10.1, 2.3)                                             | Q-5; Q-8; Q-10                       | Q-7; Q-8                                         |
| Q-7          | 135.0 CH                  | 5.98 (m)                                                         | Q-5; Q-9                             | Q-6; Q-8                                         |
| Q-8          | 62.9; CH                  | 3.50-3.40 (m)                                                    | Q-7; Q-9                             | Q-6; Q-7; Q-9                                    |
| Q-9          | 73.9; CH                  | 4.52 (d, 12.4)                                                   | Q-8; Q-10                            | Q-8                                              |
| Q-10         | 154.0; C q                |                                                                  |                                      |                                                  |
| Q-11         | 65.7; CH                  | 4.95 (q, 6.5)                                                    | Q-4; Q-5; Q-6; Q-12                  | Q-12                                             |
| Q-12         | 23.8; CH <sub>3</sub>     | 1.33 (d, 6.6)                                                    | Q-4; Q-11                            | Q-11                                             |

<sup>a</sup> HMBC correlations are from the proton to the indicated carbon.

<sup>b</sup> COSY correlations are from the proton to the proton attached to the indicated position.

**Figure S26.** MS analysis of thiostrepton Ala2Met isolated from *S. laurentii* NDS1/int-A2M.

(A) HPLC-MS analysis. (1) Chromatogram extracted for  $m/z$  862.8, the calculated  $[M+2H]^{2+}$  ion of thiostrepton Ala2Met. (2) Total ion chromatogram.

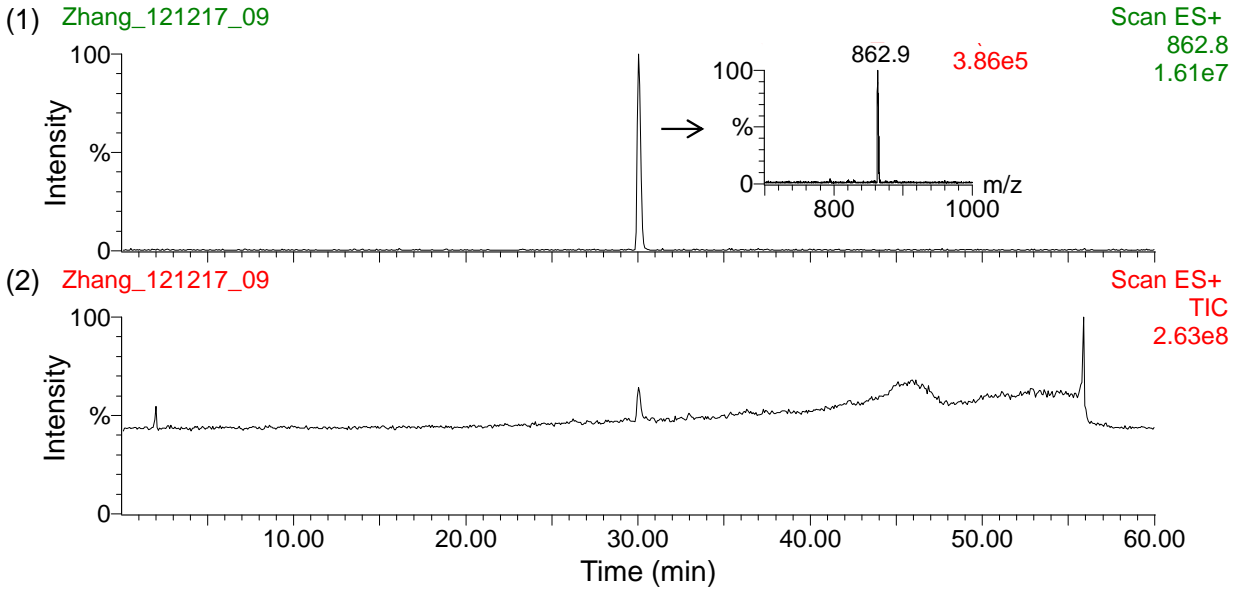

(B) MALDI MS spectrum of thiostrepton Ala2Met.

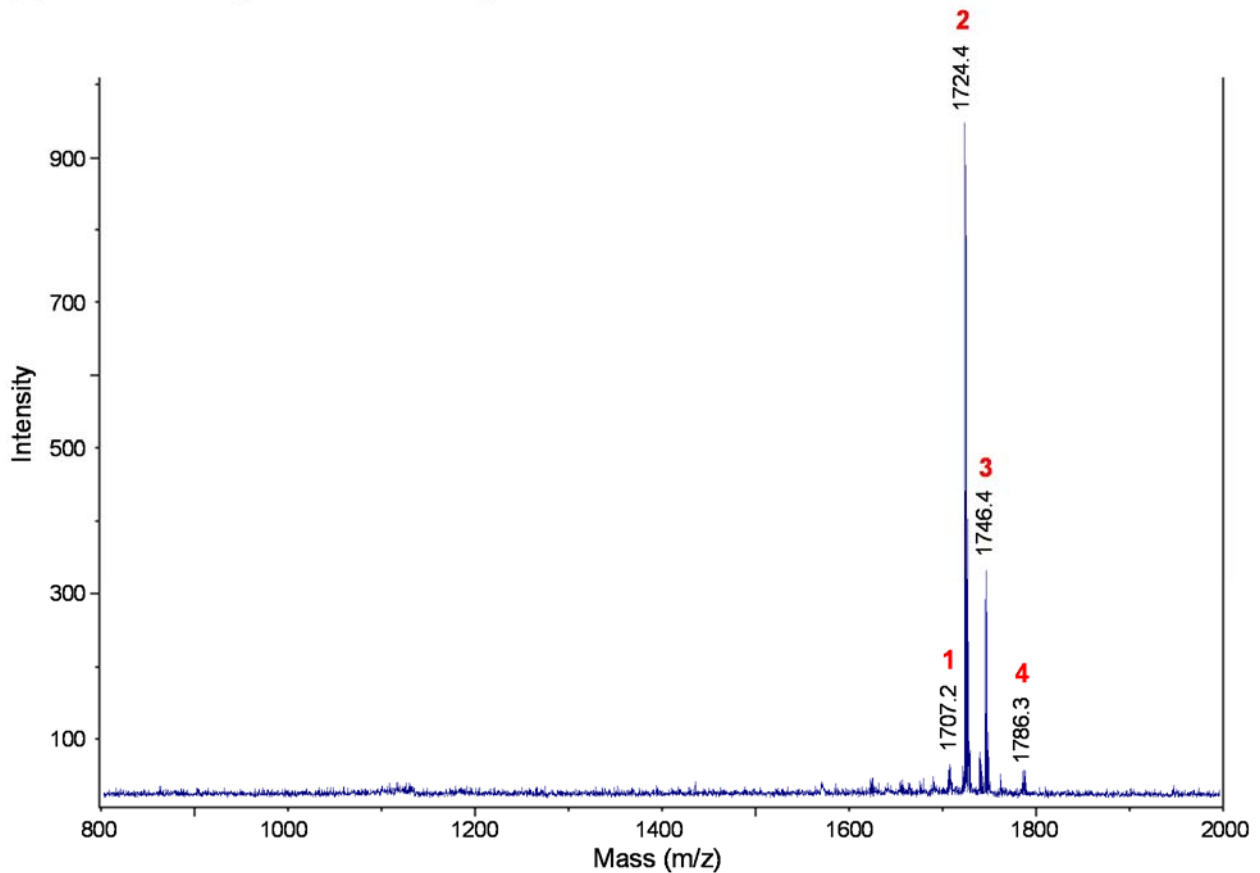

(C) MALDI MS/MS of parent ion  $m/z$  1724.4.

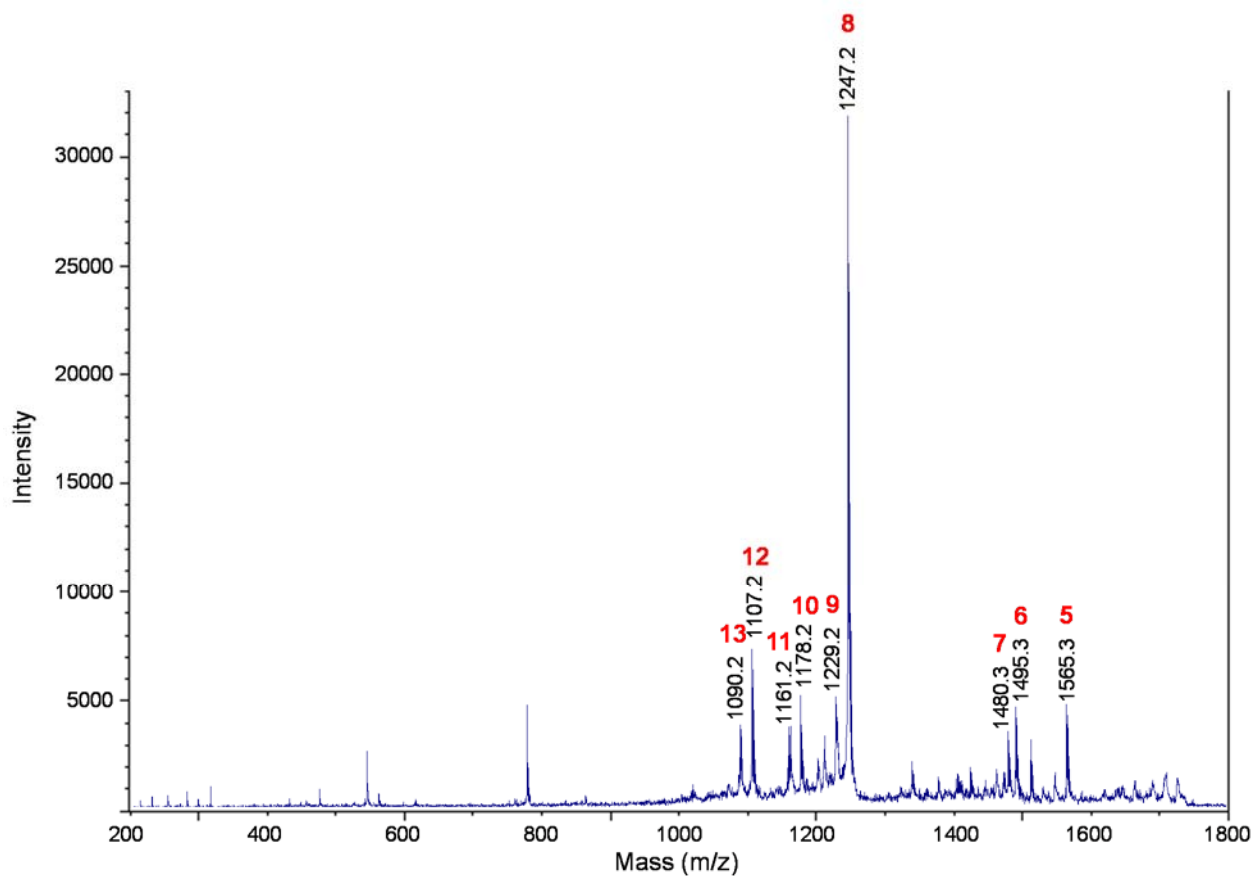

(D) Table and structure showing key ions and fragments in the MALDI MS and MS/MS of thiostrepton Ala2Met.

| Fragment                                          | Expected | Observed |
|---------------------------------------------------|----------|----------|
| 1. M-OH+H <sup>+</sup>                            | 1707.5   | 1707.2   |
| 2. M+H <sup>+</sup> (Parent ion)                  | 1724.5   | 1724.4   |
| 3. M+Na <sup>+</sup>                              | 1746.5   | 1746.4   |
| 4. M+Cu <sup>+</sup>                              | 1786.4   | 1786.3   |
| 5. M-Met2-CO+H <sup>+</sup>                       | 1565.5   | 1565.3   |
| 6. M-(Ile1-NH)-Met2+H <sup>+</sup>                | 1495.4   | 1495.3   |
| 7. M-Ile1-Met2+H <sup>+</sup>                     | 1480.4   | 1480.3   |
| 8. M-QA-Ile1-Met2+H <sup>+</sup>                  | 1247.3   | 1247.2   |
| 9. M-QA-Ile1-Met2-H <sub>2</sub> O+H <sup>+</sup> | 1229.3   | 1229.2   |
| 10. M-QA-Ile1-Met2-Dha3+H <sup>+</sup>            | 1178.3   | 1178.2   |
| 11. M-QA-Ile1-Met2-Dha3-OH+H <sup>+</sup>         | 1161.3   | 1161.2   |
| 12. M-QA-Ile1-Met2-Dha3-Ala4+H <sup>+</sup>       | 1107.3   | 1107.2   |
| 13. M-QA-Ile1-Met2-Dha3-Ala4-OH+H <sup>+</sup>    | 1090.2   | 1090.2   |

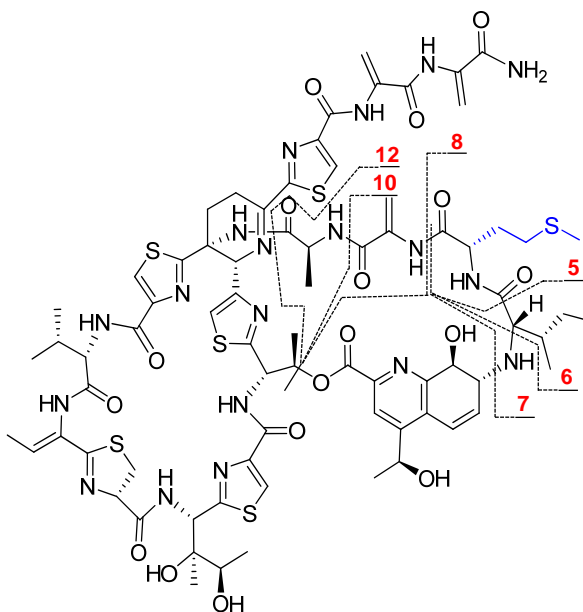



**Figure S27.** MS analysis of thiostrepton Ala2Phe isolated from *S. laurentii* NDS1/int-A2F.

(A) HPLC-MS analysis. (1) Chromatogram extracted for  $m/z$  870.8, the calculated  $[M+2H]^{2+}$  ion of thiostrepton Ala2Phe. (2) Total ion chromatogram.

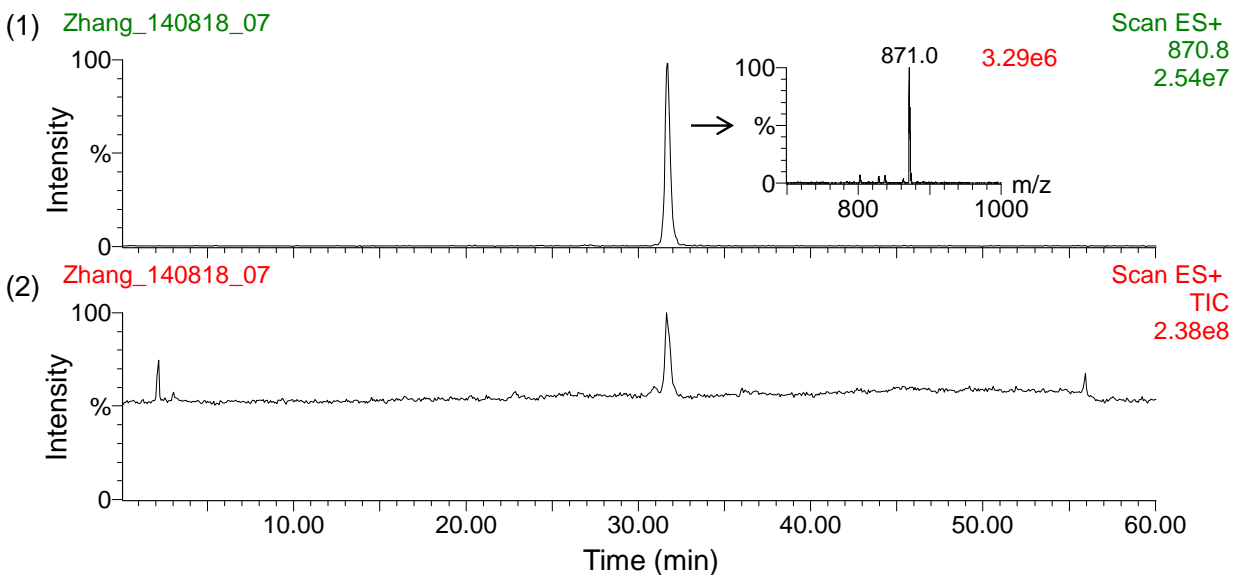

(B) MALDI MS spectrum of thiostrepton Ala2Phe.

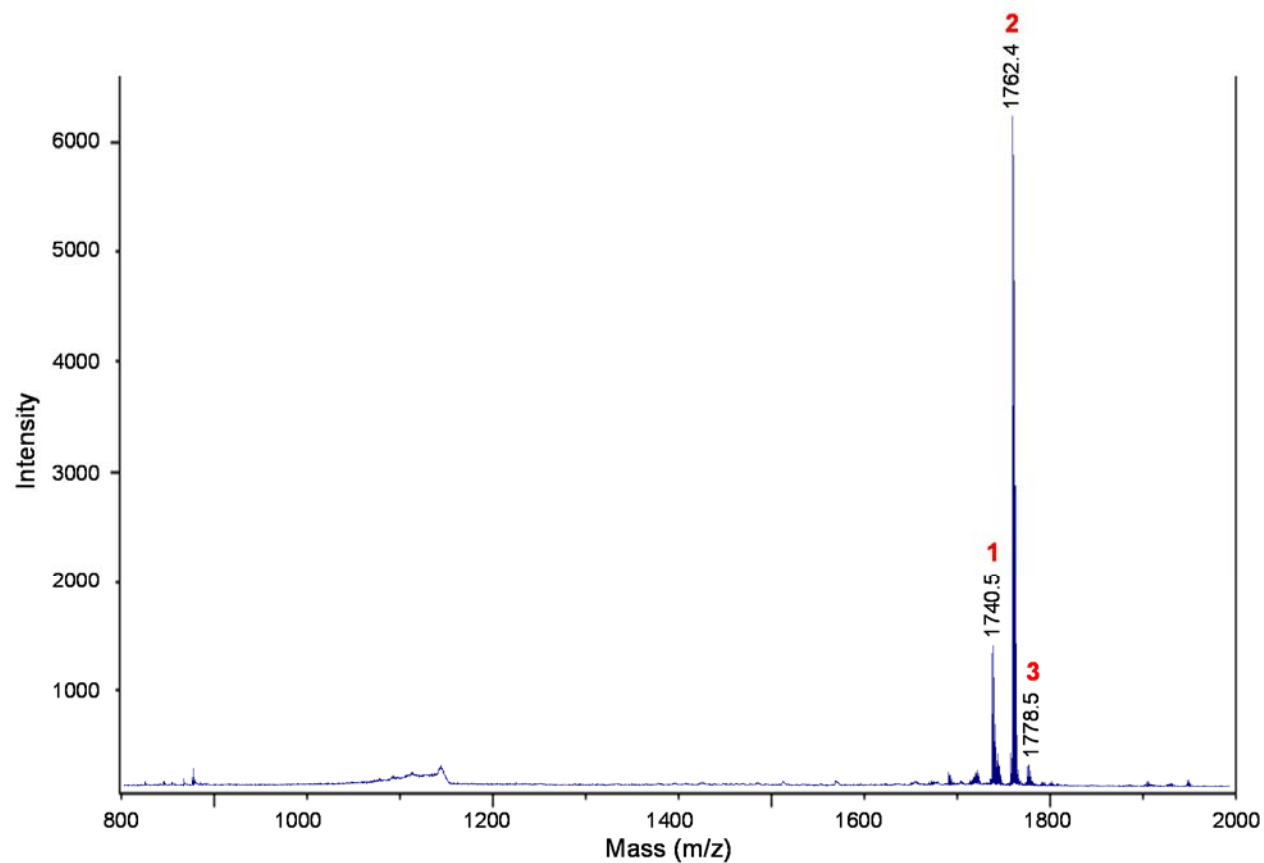

(C) MALDI MS/MS of parent ion  $m/z$  1740.5.

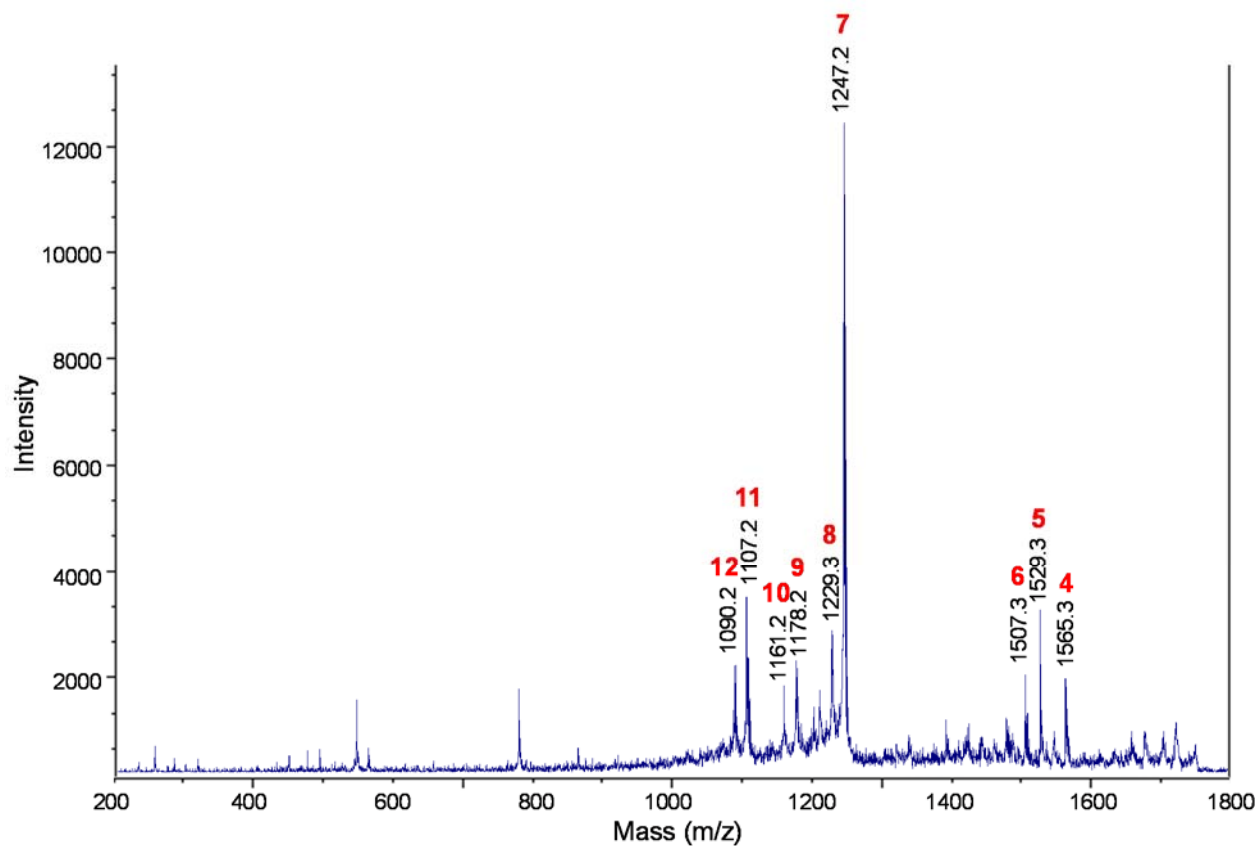

(D) Table and structure showing key ions and fragments in the MALDI MS and MS/MS of thiostrepton Ala2Phe.

| Fragment                                          | Expected | Observed |
|---------------------------------------------------|----------|----------|
| 1. M+H <sup>+</sup> (Parent ion)                  | 1740.5   | 1740.5   |
| 2. M+Na <sup>+</sup>                              | 1762.5   | 1762.4   |
| 3. M+K <sup>+</sup>                               | 1778.5   | 1778.5   |
| 4. M-Phe2-CO+H <sup>+</sup>                       | 1565.5   | 1565.3   |
| 5. M-Dhb8-Tzn9-CO-NH+H <sup>+</sup>               | 1529.5   | 1529.3   |
| 6. M-QA+H <sup>+</sup>                            | 1507.5   | 1507.3   |
| 7. M-QA-Ile1-Phe2+H <sup>+</sup>                  | 1247.3   | 1247.2   |
| 8. M-QA-Ile1-Phe2-H <sub>2</sub> O+H <sup>+</sup> | 1229.3   | 1229.3   |
| 9. M-QA-Ile1-Phe2-Dha3+H <sup>+</sup>             | 1178.3   | 1178.2   |
| 10. M-QA-Ile1-Phe2-Dha3-OH+H <sup>+</sup>         | 1161.3   | 1161.2   |
| 11. M-QA-Ile1-Phe2-Dha3-Ala4+H <sup>+</sup>       | 1107.3   | 1107.2   |
| 12. M-QA-Ile1-Phe2-Dha3-Ala4-OH+H <sup>+</sup>    | 1090.2   | 1090.2   |

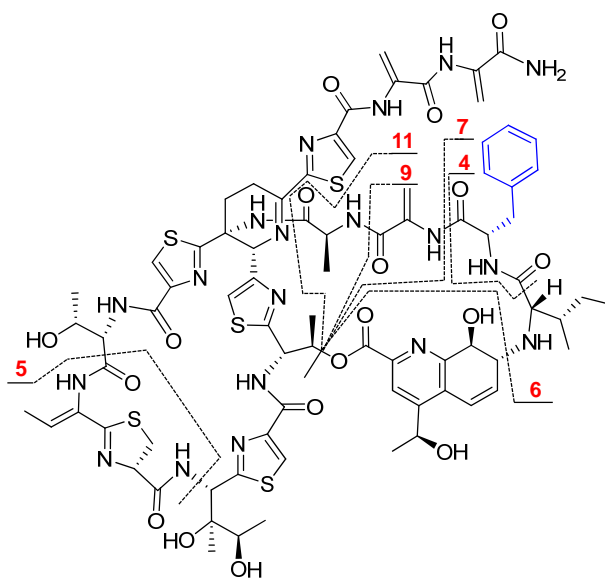

**Figure S28.** MS analysis of thiostrepton Ala2Tyr isolated from *S. laurentii* NDS1/int-A2Y.

(A) HPLC-MS analysis. (1) Chromatogram extracted for  $m/z$  878.8, the calculated  $[M+2H]^{2+}$  ion of thiostrepton Ala2Tyr. (2) Total ion chromatogram.

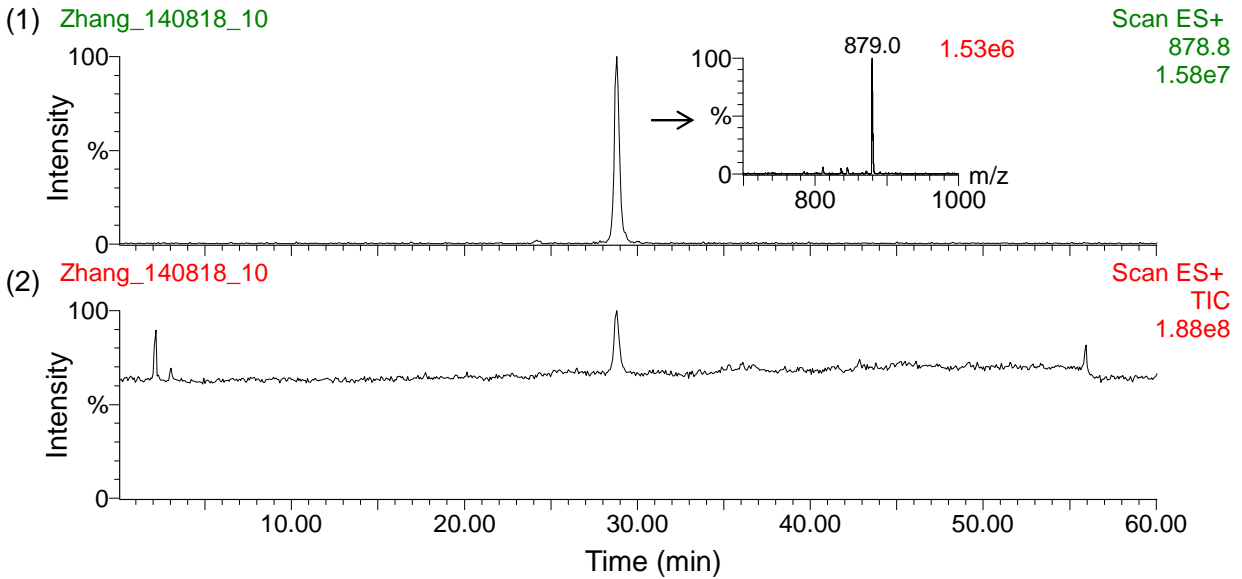

(B) MALDI MS spectrum of thiostrepton Ala2Tyr.

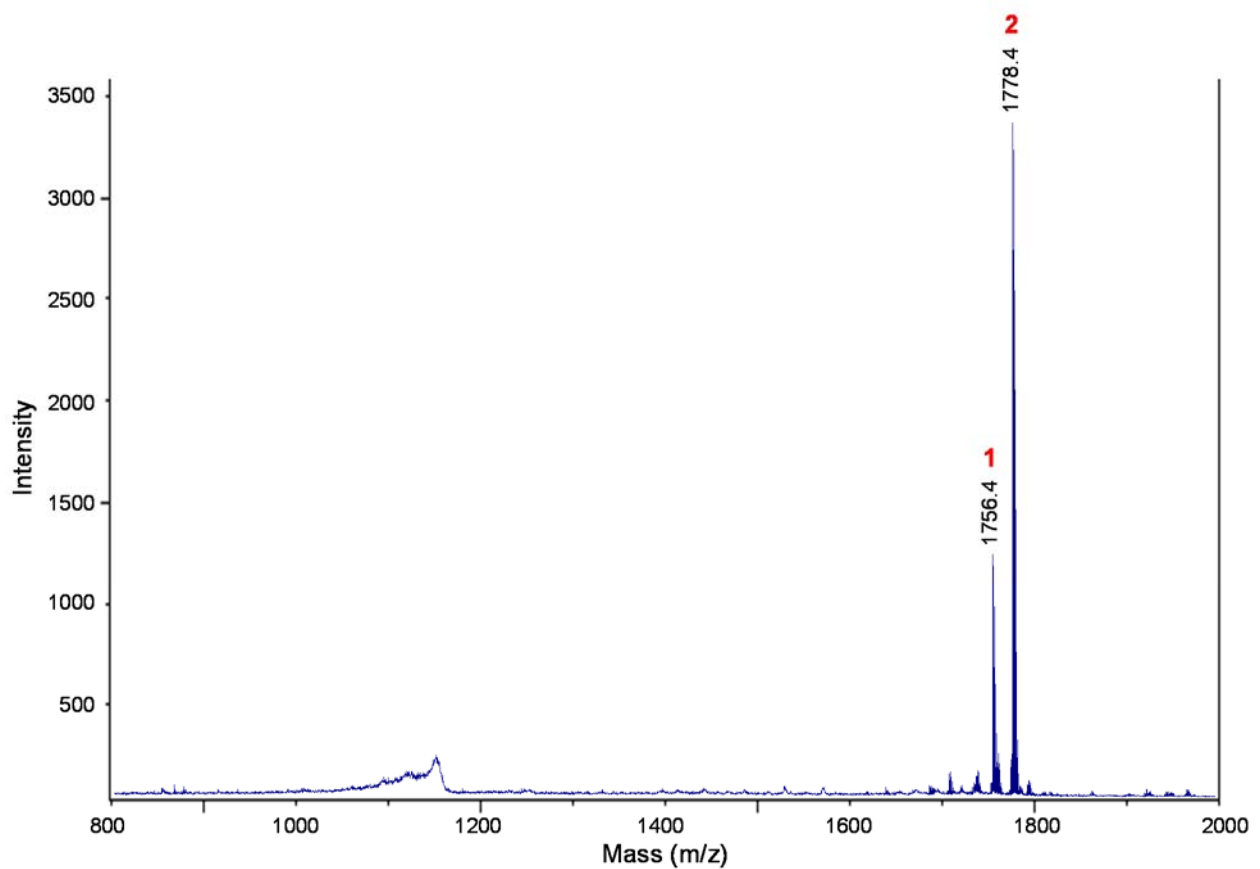

(C) MALDI MS/MS of parent ion  $m/z$  1756.4.

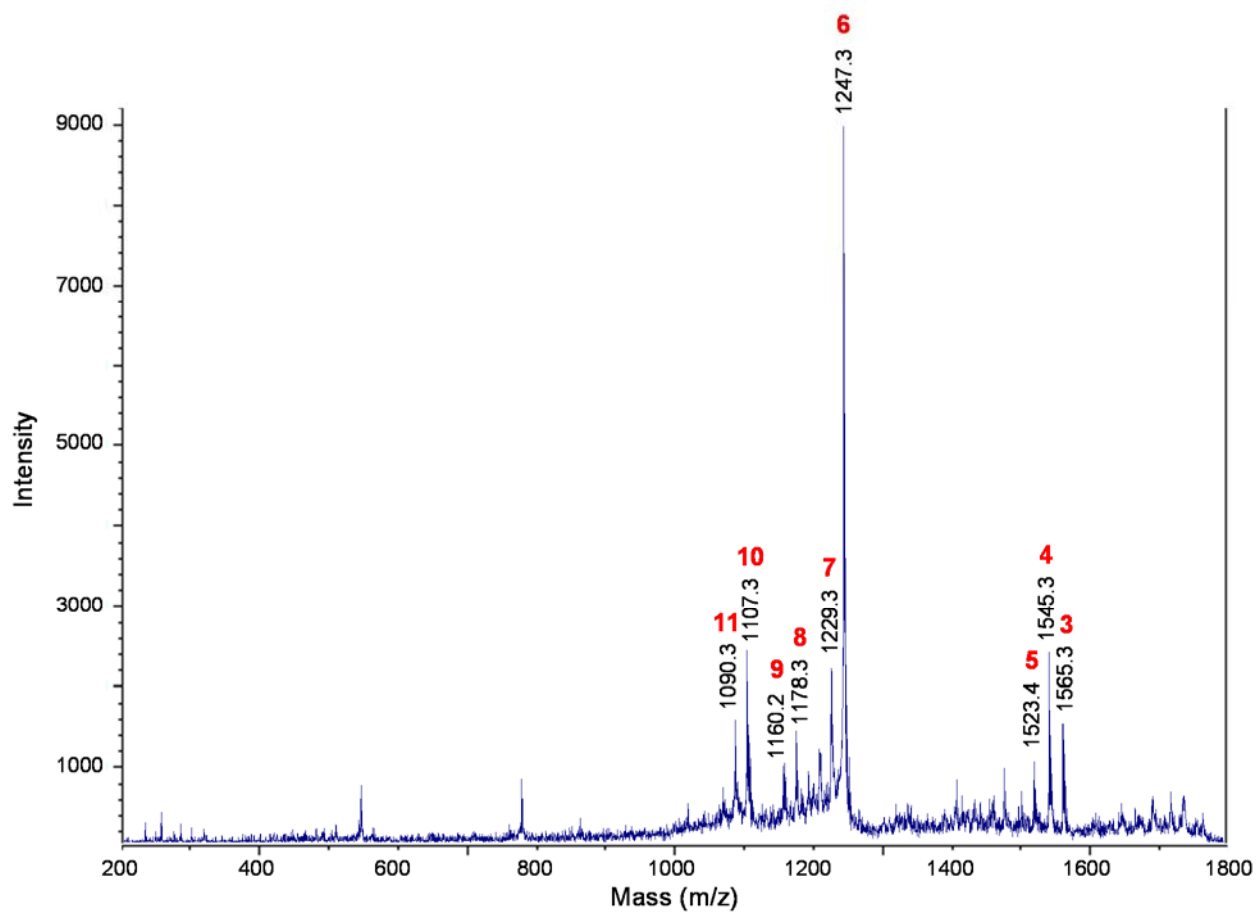

(D) Table and structure showing key ions and fragments in the MALDI MS and MS/MS of thiostrepton Ala2Tyr.

| Fragment                                               | Expected | Observed |
|--------------------------------------------------------|----------|----------|
| 1. M+H <sup>+</sup> (Parent ion)                       | 1756.5   | 1756.4   |
| 2. M+Na <sup>+</sup>                                   | 1778.5   | 1778.4   |
| 3. M-Tyr2-CO+H <sup>+</sup>                            | 1565.5   | 1565.3   |
| 4. M-Dhb8-Tzn9-CO-NH+H <sup>+</sup>                    | 1545.5   | 1545.3   |
| 5. M-QA+H <sup>+</sup>                                 | 1523.5   | 1523.4   |
| 6. M-QA-Ile1-Tyr2+H <sup>+</sup>                       | 1247.3   | 1247.3   |
| 7. M-QA-Ile1-Tyr2-H <sub>2</sub> O+H <sup>+</sup>      | 1229.3   | 1229.3   |
| 8. M-QA-Ile1-Tyr2-Dha3+H <sup>+</sup>                  | 1178.3   | 1178.3   |
| 9. M-QA-Ile1-Tyr2-Dha3-H <sub>2</sub> O+H <sup>+</sup> | 1160.3   | 1160.2   |
| 10. M-QA-Ile1-Tyr2-Dha3-Ala4+H <sup>+</sup>            | 1107.3   | 1107.3   |
| 11. M-QA-Ile1-Tyr2-Dha3-Ala4-OH+H <sup>+</sup>         | 1090.2   | 1090.3   |

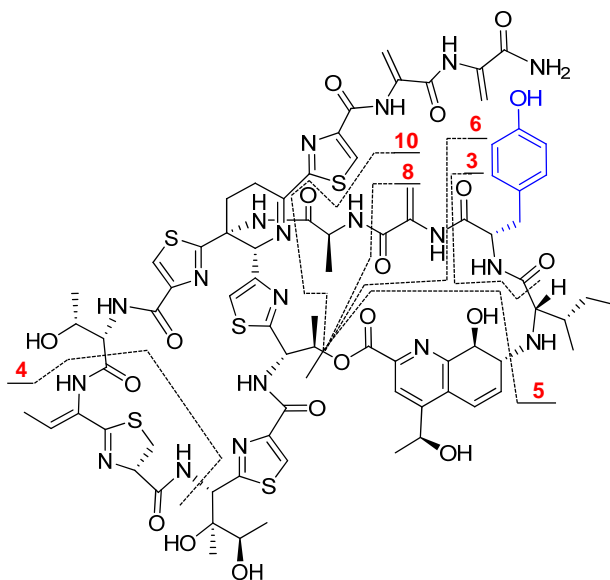

**Figure S29.** MS analysis of thiostrepton Ala2Val- $\Delta$ Ile1 isolated from *S. laurentii* NDS1/int-A2V.

(A) HPLC-MS analysis. (1) Chromatogram extracted for  $m/z$  790.2, the calculated  $[M+2H]^{2+}$  ion of thiostrepton Ala2Val- $\Delta$ Ile1. (2) Total ion chromatogram.

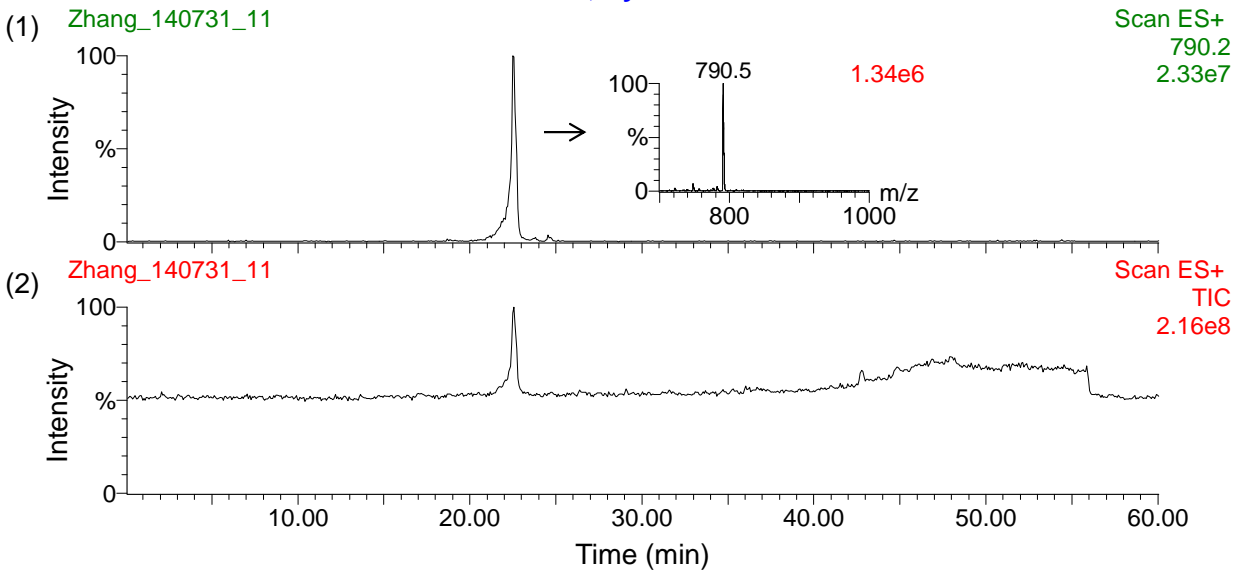

(B) MALDI MS spectrum of thiostrepton Ala2Val- $\Delta$ Ile1.

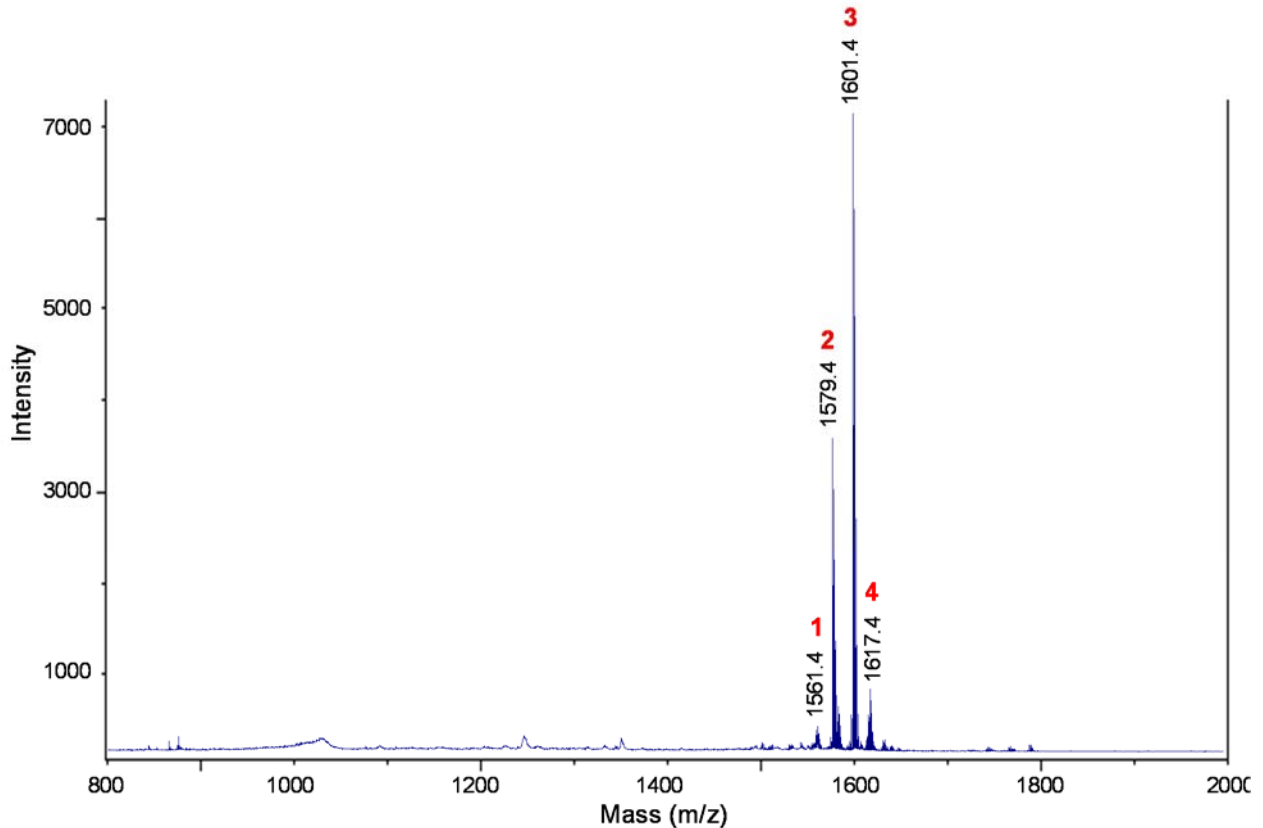

(C) MALDI MS/MS of parent ion  $m/z$  1579.4.

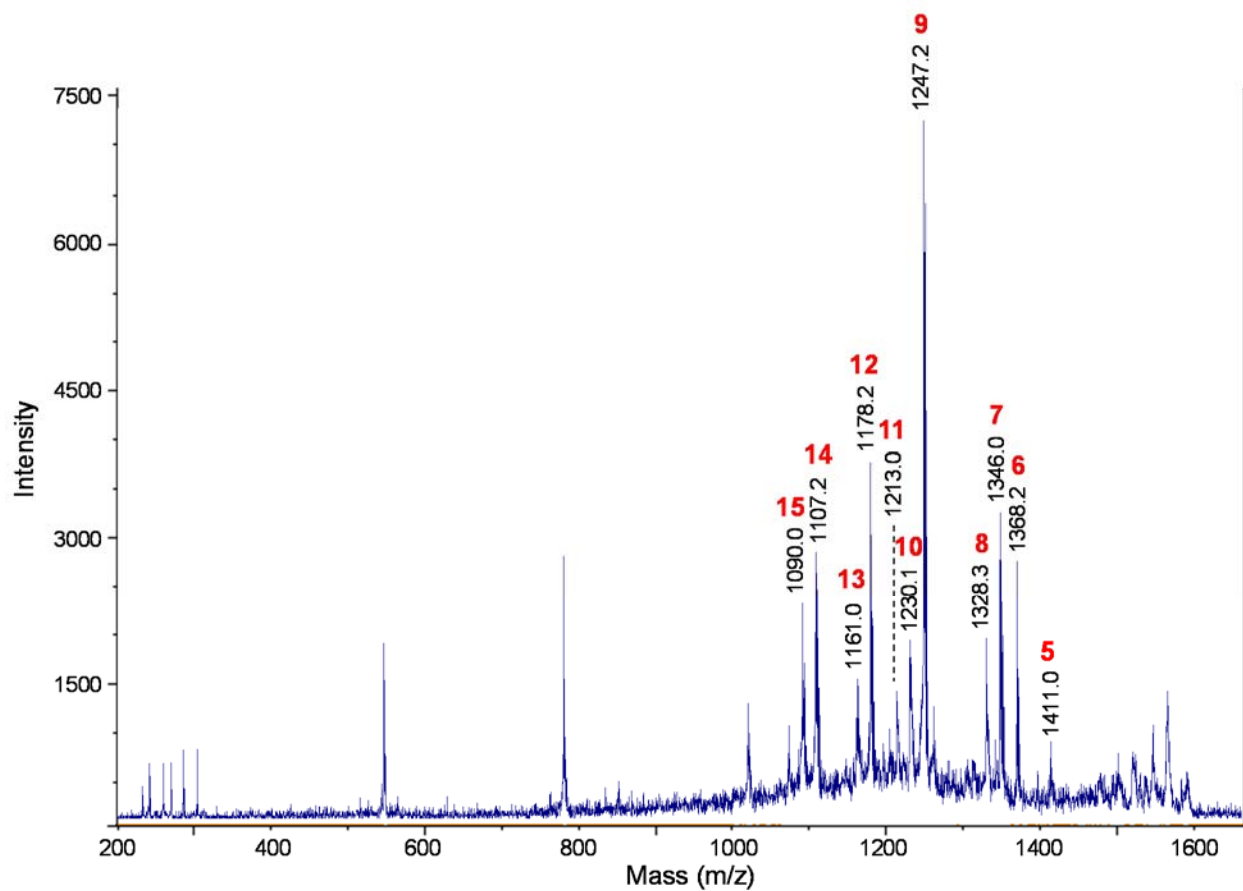

(D) Table and structure showing key ions and fragments in the MALDI MS and MS/MS of thiostrepton Ala2Val- $\Delta$ Ile1.

| Fragment                                  | Expected | Observed |
|-------------------------------------------|----------|----------|
| 1. M-H <sub>2</sub> O+H <sup>+</sup>      | 1561.4   | 1561.4   |
| 2. M+H <sup>+</sup> (Parent ion)          | 1579.4   | 1579.4   |
| 3. M+Na <sup>+</sup>                      | 1601.4   | 1601.4   |
| 4. M+K <sup>+</sup>                       | 1617.4   | 1617.4   |
| 5. M-Dhb8-Tzn9+H <sup>+</sup>             | 1411.4   | 1411.0   |
| 6. M-Val2-Dha3-(Ala4-CO)+H <sup>+</sup>   | 1368.3   | 1368.2   |
| 7. M-QA+H <sup>+</sup>                    | 1346.4   | 1346.3   |
| 8. M-QA-H <sub>2</sub> O+H <sup>+</sup>   | 1328.4   | 1328.3   |
| 9. M-QA-Val2+H <sup>+</sup>               | 1247.3   | 1247.2   |
| 10. M-QA-Val2-OH+H <sup>+</sup>           | 1230.3   | 1230.1   |
| 11. M-QA-Val2-OH-OH+H <sup>+</sup>        | 1213.3   | 1213.0   |
| 12. M-QA-Val2-Dha3+H <sup>+</sup>         | 1178.3   | 1178.2   |
| 13. M-QA-Val2-Dha3-OH+H <sup>+</sup>      | 1161.3   | 1161.0   |
| 14. M-QA-Val2-Dha3-Ala4+H <sup>+</sup>    | 1107.3   | 1107.2   |
| 15. M-QA-Val2-Dha3-Ala4-OH+H <sup>+</sup> | 1090.2   | 1090.0   |

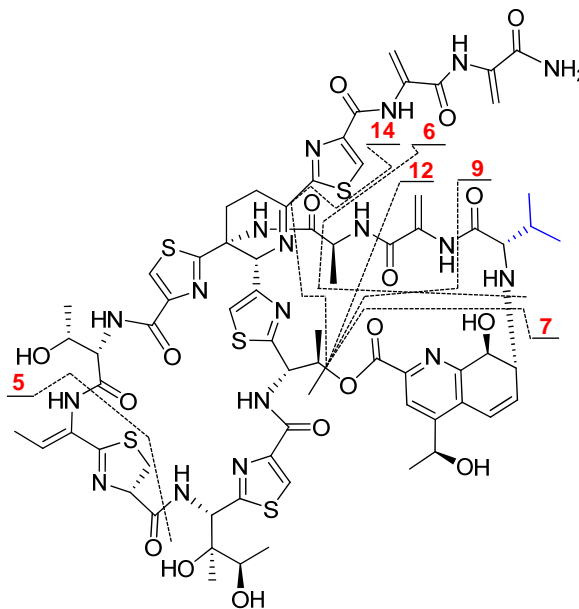

**Figure S30.** Structure and numbering system used for thiostrepton Ala2Val- $\Delta$ Ile1.

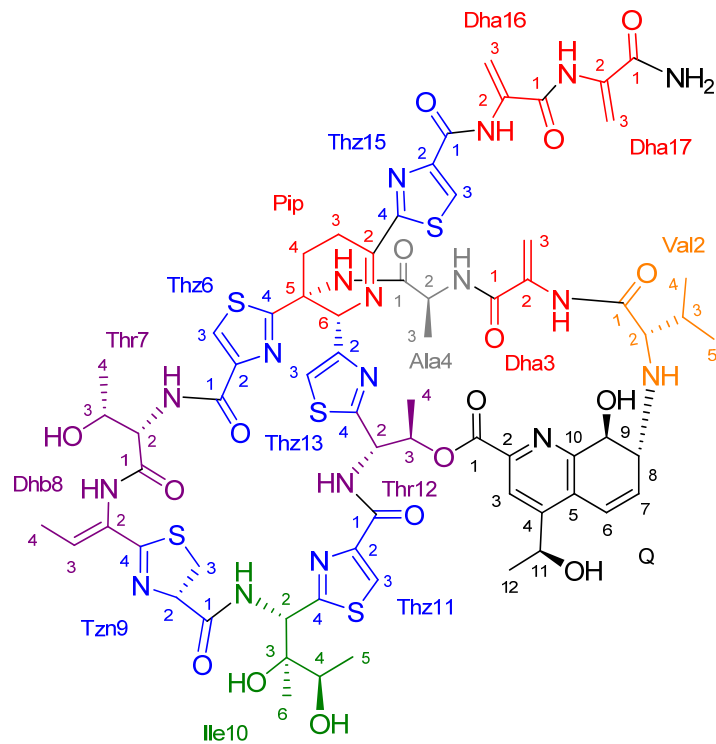

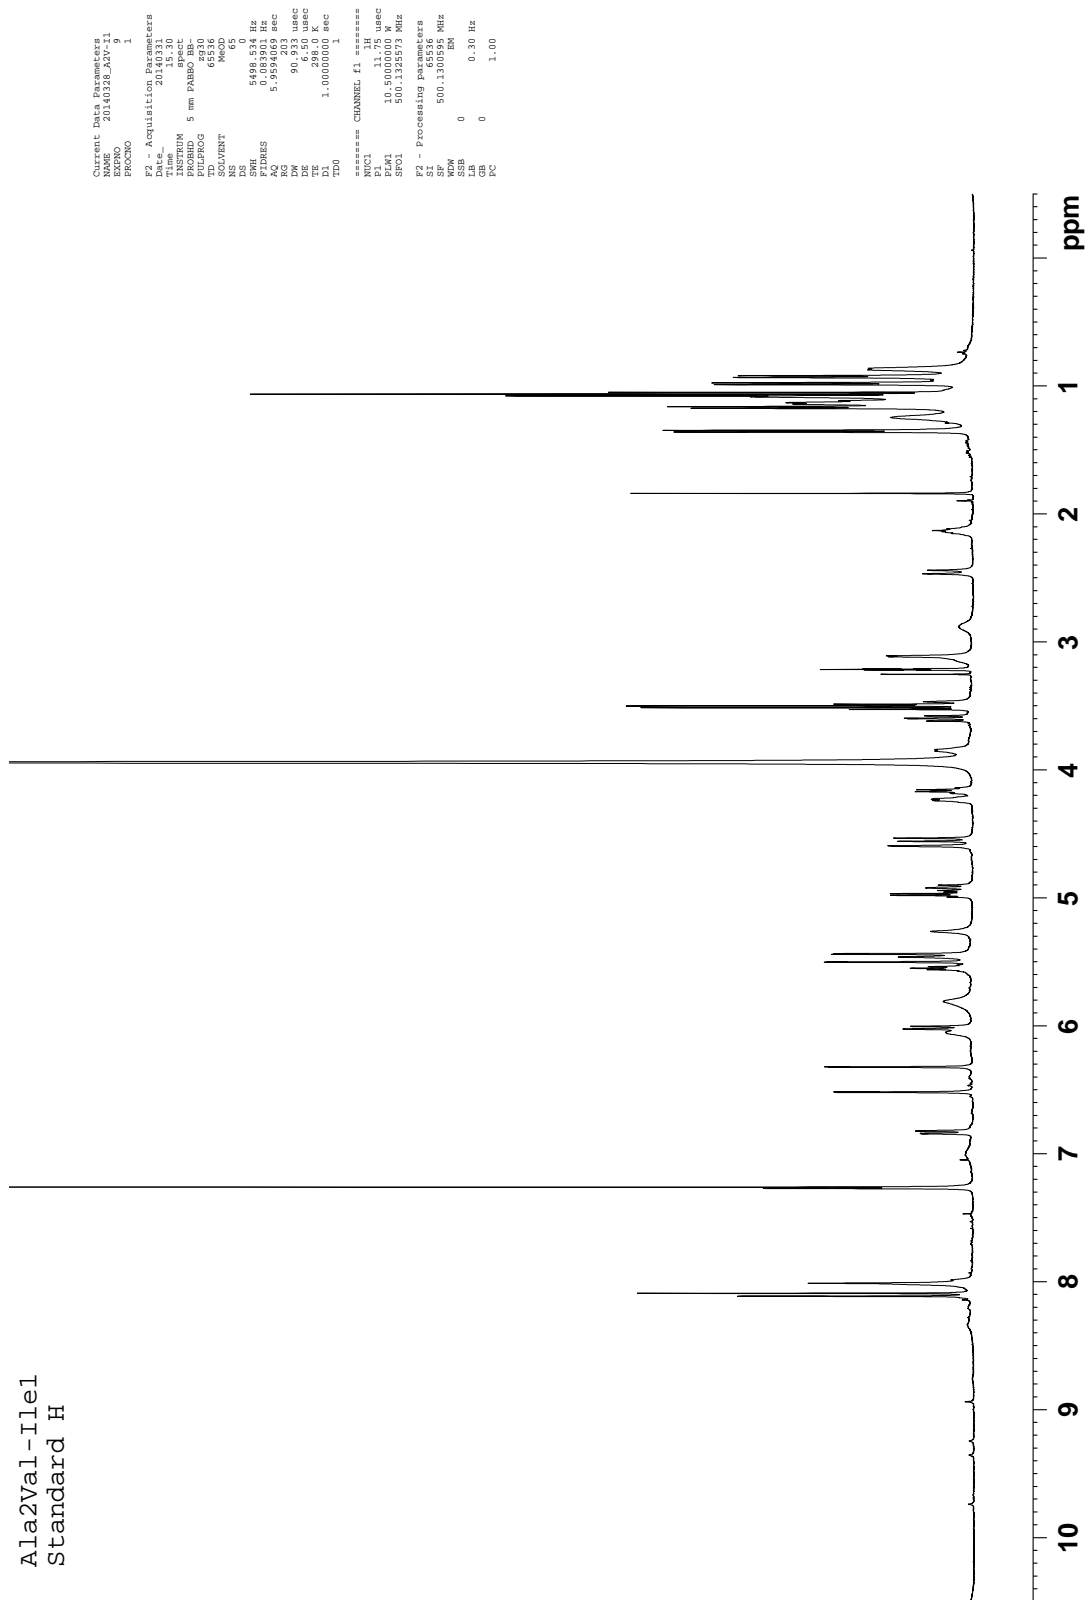

**Figure S31.**  $^1\text{H}$  NMR spectrum of thioestrepton Ala2Val- $\Delta$ Ile1 (500 MHz,  $\text{CDCl}_3\text{-CD}_3\text{OD}$  4:1, 25  $^\circ\text{C}$ ).



Ala2Val-Ile1  
Standard C13

```
Current Data Parameters
NAME      20140328_A2V-11
EXPNO    2
PROCNO   1

F2 - Acquisition Parameters
Date_    20140402
Time     18.35
INSTRUM spect
PULPROG zgpg30
TD       65536
SOLVENT MeOD
NS       45705
DS       4
SWH      29761.904 Hz
FIDRES   0.454131 Hz
AQ       1.1010048 sec
RG       327.680
DM       16.800 usec
DE       6.50 usec
TE       278.0 K
D1       2.0000000 sec
D11      0.0300000 sec
D12      0.0300000 sec
D13      0.0300000 sec
D14      0.0300000 sec
D15      0.0300000 sec
D16      0.0300000 sec
D17      0.0300000 sec
D18      0.0300000 sec
D19      0.0300000 sec
D20      0.0300000 sec
===== CHANNEL f1 =====
NUC1     13C
P1       12.0000000 usec
PL1      0.0000000 dB
PLM1     72.00000000 W
SFO1     125.7703637 MHz

===== CHANNEL f2 =====
CPDPRG12 waltz16
NUC2     1H
PCPD2    80.00 usec
PLM2     25.00000000 W
PLM3     0.47260001 W
PLM13    0.30250001 W
SFO2     500.1320005 MHz

F2 - Processing Parameters
SI       32768
SF       125.7578278 MHz
WDW      EM
SSB      0
LFS      0
GB       0
PC       1.40
```

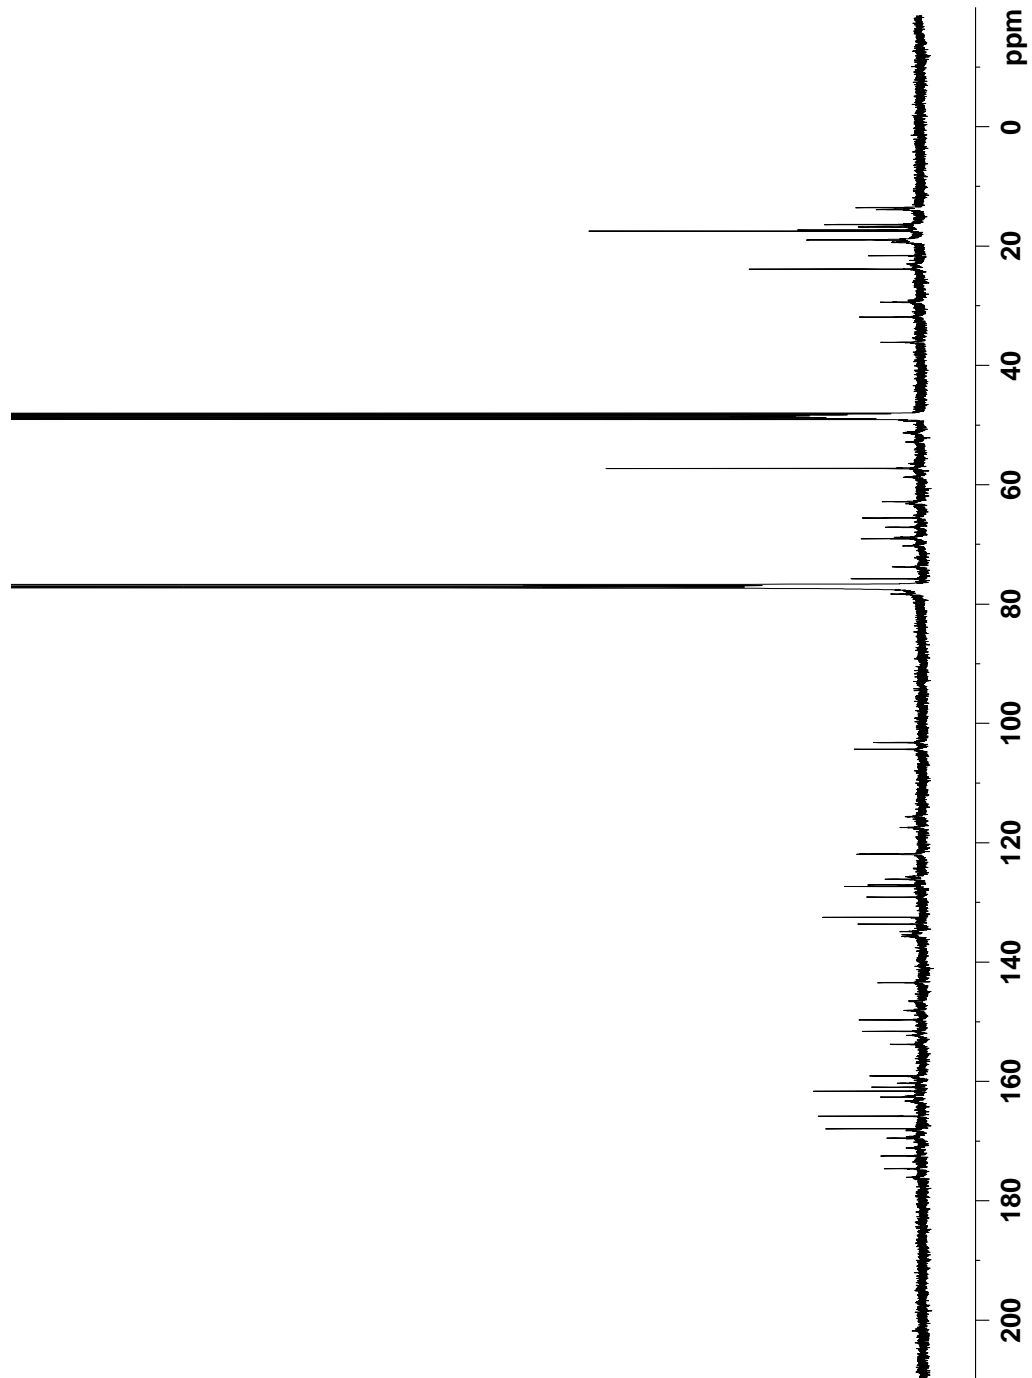

**Figure S32.** <sup>13</sup>C NMR spectrum of thioestrepton Ala2Val-ΔIle1 (125 MHz, CDCl<sub>3</sub>-CD<sub>3</sub>OD 4:1, 25 °C).

Ala2Val-Ile1  
DEPT135

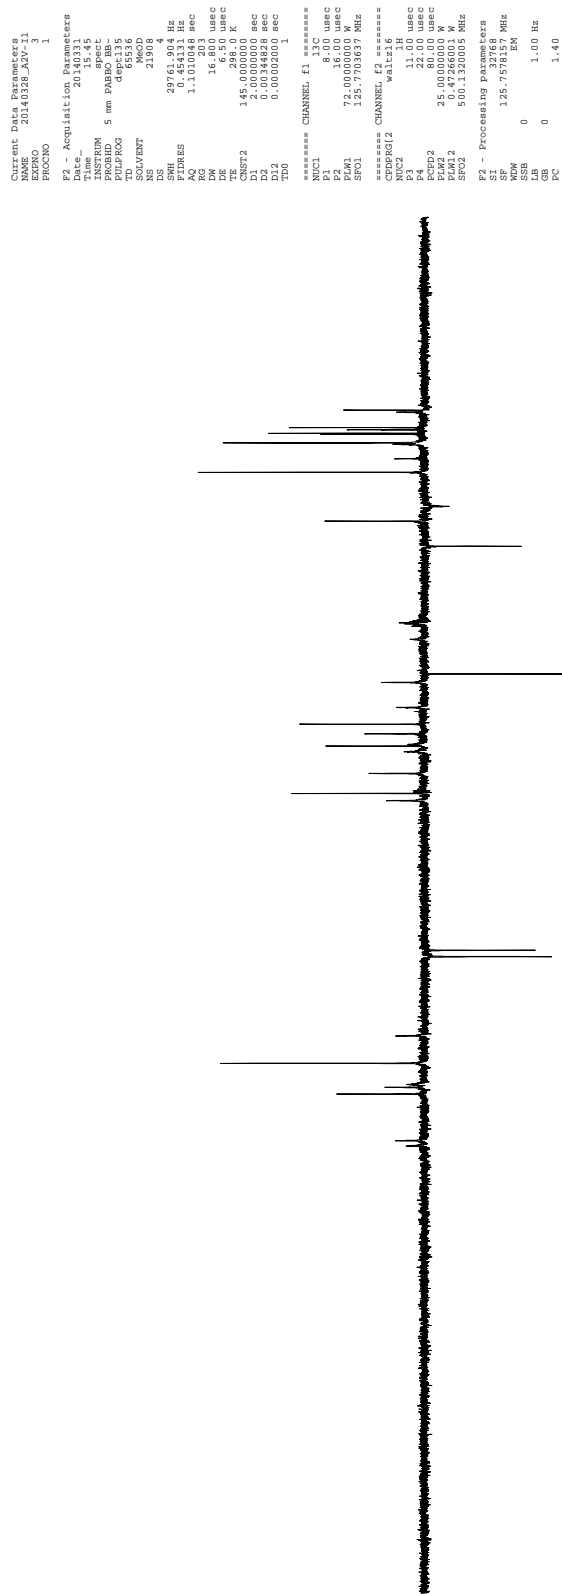

**Figure S33.** DEPT-135 NMR spectrum of thiostrepton Ala2Val-Ile1 (125 MHz, CDCl<sub>3</sub>-CD<sub>3</sub>OD 4:1, 25 °C).



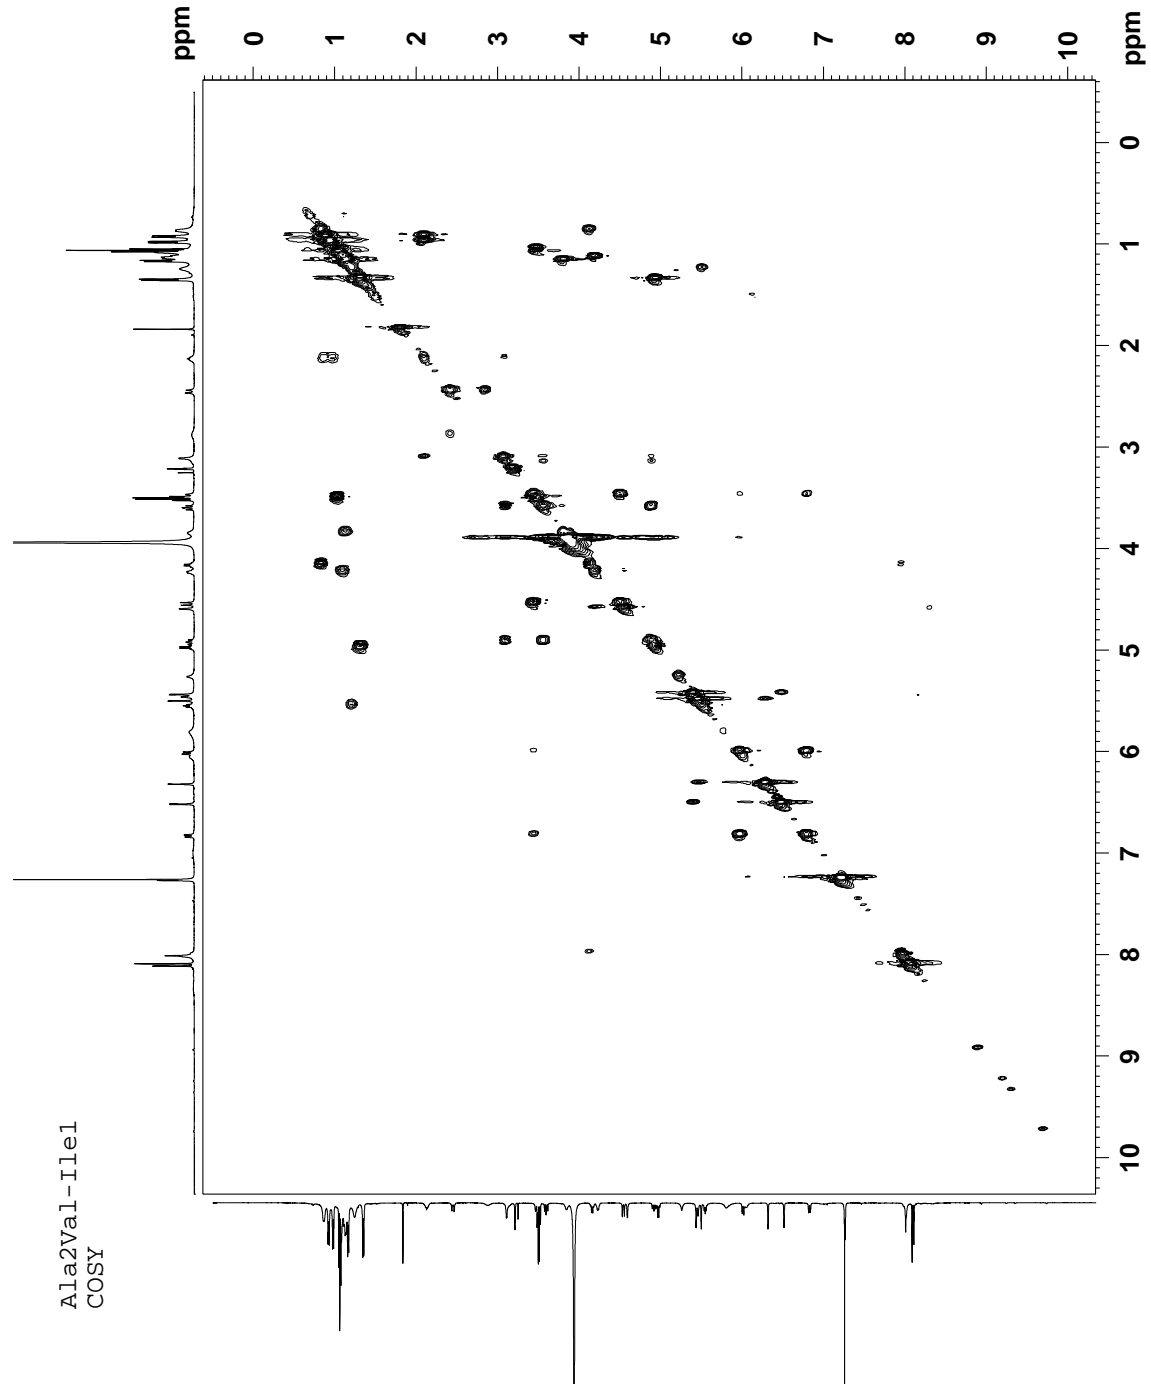

```

Current Data Parameters
EXPNO 7
PROCNO 1
F2 - Acquisition Parameters
Date_ 20180330
Time 11.00
INSTRUM spect
PROBHD 5 mm TBI IH-13
TD 65536
AQ 0.0393125
RG 2048
SOLVENT MeOD
DS 2
F1 - Acquisition Parameters
Date_ 20180330
Time 11.00
INSTRUM spect
PROBHD 5 mm TBI IH-13
TD 65536
AQ 0.0393125
RG 2048
SOLVENT MeOD
DS 2
F2 - Processing Parameters
SI 500.1300662 MHz
SF 500.1300662 MHz
WDW EM
SSB 0
LB 0 Hz
GB 0
PC 1.40
F1 - Processing Parameters
SI 500.1300662 MHz
SF 500.1300662 MHz
WDW EM
SSB 0
LB 0 Hz
GB 0
PC 1.40

===== CHANNEL f1 =====
NUC1 1H
P0 11.75 usec
P1 0.0000000 sec
P2 0.0000000 sec
P3 2500.00 usec
P4 0.0000000 sec
P5 10.5000000 MHz
P6 10.5000000 MHz
P7 2500.00 usec
P8 0.0000000 sec
P9 10.5000000 MHz
P10 10.5000000 MHz
P11 500.1325007 MHz
P12 500.1325007 MHz
P13 0.0000000 sec
P14 0.0000000 sec
P15 0.0000000 sec
P16 0.0000000 sec
P17 0.0000000 sec
P18 0.0000000 sec
P19 0.0000000 sec
P20 0.0000000 sec
P21 0.0000000 sec
P22 0.0000000 sec
P23 0.0000000 sec
P24 0.0000000 sec
P25 0.0000000 sec
P26 0.0000000 sec
P27 0.0000000 sec
P28 0.0000000 sec
P29 0.0000000 sec
P30 0.0000000 sec
P31 0.0000000 sec
P32 0.0000000 sec
P33 0.0000000 sec
P34 0.0000000 sec
P35 0.0000000 sec
P36 0.0000000 sec
P37 0.0000000 sec
P38 0.0000000 sec
P39 0.0000000 sec
P40 0.0000000 sec
P41 0.0000000 sec
P42 0.0000000 sec
P43 0.0000000 sec
P44 0.0000000 sec
P45 0.0000000 sec
P46 0.0000000 sec
P47 0.0000000 sec
P48 0.0000000 sec
P49 0.0000000 sec
P50 0.0000000 sec
P51 0.0000000 sec
P52 0.0000000 sec
P53 0.0000000 sec
P54 0.0000000 sec
P55 0.0000000 sec
P56 0.0000000 sec
P57 0.0000000 sec
P58 0.0000000 sec
P59 0.0000000 sec
P60 0.0000000 sec
P61 0.0000000 sec
P62 0.0000000 sec
P63 0.0000000 sec
P64 0.0000000 sec
P65 0.0000000 sec
P66 0.0000000 sec
P67 0.0000000 sec
P68 0.0000000 sec
P69 0.0000000 sec
P70 0.0000000 sec
P71 0.0000000 sec
P72 0.0000000 sec
P73 0.0000000 sec
P74 0.0000000 sec
P75 0.0000000 sec
P76 0.0000000 sec
P77 0.0000000 sec
P78 0.0000000 sec
P79 0.0000000 sec
P80 0.0000000 sec
P81 0.0000000 sec
P82 0.0000000 sec
P83 0.0000000 sec
P84 0.0000000 sec
P85 0.0000000 sec
P86 0.0000000 sec
P87 0.0000000 sec
P88 0.0000000 sec
P89 0.0000000 sec
P90 0.0000000 sec
P91 0.0000000 sec
P92 0.0000000 sec
P93 0.0000000 sec
P94 0.0000000 sec
P95 0.0000000 sec
P96 0.0000000 sec
P97 0.0000000 sec
P98 0.0000000 sec
P99 0.0000000 sec
P100 0.0000000 sec

===== GRADIENT CHANNELS =====
GEX1 0 %
GEX2 0 %
GEX3 0 %
GEX4 0 %
GEX5 0 %
GEX6 0 %
GEX7 0 %
GEX8 0 %
GEX9 0 %
GEX10 0 %
GEX11 0 %
GEX12 0 %
GEX13 0 %
GEX14 0 %
GEX15 0 %
GEX16 0 %
GEX17 0 %
GEX18 0 %
GEX19 0 %
GEX20 0 %
GEX21 0 %
GEX22 0 %
GEX23 0 %
GEX24 0 %
GEX25 0 %
GEX26 0 %
GEX27 0 %
GEX28 0 %
GEX29 0 %
GEX30 0 %
GEX31 0 %
GEX32 0 %
GEX33 0 %
GEX34 0 %
GEX35 0 %
GEX36 0 %
GEX37 0 %
GEX38 0 %
GEX39 0 %
GEX40 0 %
GEX41 0 %
GEX42 0 %
GEX43 0 %
GEX44 0 %
GEX45 0 %
GEX46 0 %
GEX47 0 %
GEX48 0 %
GEX49 0 %
GEX50 0 %
GEX51 0 %
GEX52 0 %
GEX53 0 %
GEX54 0 %
GEX55 0 %
GEX56 0 %
GEX57 0 %
GEX58 0 %
GEX59 0 %
GEX60 0 %
GEX61 0 %
GEX62 0 %
GEX63 0 %
GEX64 0 %
GEX65 0 %
GEX66 0 %
GEX67 0 %
GEX68 0 %
GEX69 0 %
GEX70 0 %
GEX71 0 %
GEX72 0 %
GEX73 0 %
GEX74 0 %
GEX75 0 %
GEX76 0 %
GEX77 0 %
GEX78 0 %
GEX79 0 %
GEX80 0 %
GEX81 0 %
GEX82 0 %
GEX83 0 %
GEX84 0 %
GEX85 0 %
GEX86 0 %
GEX87 0 %
GEX88 0 %
GEX89 0 %
GEX90 0 %
GEX91 0 %
GEX92 0 %
GEX93 0 %
GEX94 0 %
GEX95 0 %
GEX96 0 %
GEX97 0 %
GEX98 0 %
GEX99 0 %
GEX100 0 %

===== CHANNEL f2 =====
NUC2 1H
P0 11.75 usec
P1 0.0000000 sec
P2 0.0000000 sec
P3 2500.00 usec
P4 0.0000000 sec
P5 10.5000000 MHz
P6 10.5000000 MHz
P7 2500.00 usec
P8 0.0000000 sec
P9 10.5000000 MHz
P10 10.5000000 MHz
P11 500.1325007 MHz
P12 500.1325007 MHz
P13 0.0000000 sec
P14 0.0000000 sec
P15 0.0000000 sec
P16 0.0000000 sec
P17 0.0000000 sec
P18 0.0000000 sec
P19 0.0000000 sec
P20 0.0000000 sec
P21 0.0000000 sec
P22 0.0000000 sec
P23 0.0000000 sec
P24 0.0000000 sec
P25 0.0000000 sec
P26 0.0000000 sec
P27 0.0000000 sec
P28 0.0000000 sec
P29 0.0000000 sec
P30 0.0000000 sec
P31 0.0000000 sec
P32 0.0000000 sec
P33 0.0000000 sec
P34 0.0000000 sec
P35 0.0000000 sec
P36 0.0000000 sec
P37 0.0000000 sec
P38 0.0000000 sec
P39 0.0000000 sec
P40 0.0000000 sec
P41 0.0000000 sec
P42 0.0000000 sec
P43 0.0000000 sec
P44 0.0000000 sec
P45 0.0000000 sec
P46 0.0000000 sec
P47 0.0000000 sec
P48 0.0000000 sec
P49 0.0000000 sec
P50 0.0000000 sec
P51 0.0000000 sec
P52 0.0000000 sec
P53 0.0000000 sec
P54 0.0000000 sec
P55 0.0000000 sec
P56 0.0000000 sec
P57 0.0000000 sec
P58 0.0000000 sec
P59 0.0000000 sec
P60 0.0000000 sec
P61 0.0000000 sec
P62 0.0000000 sec
P63 0.0000000 sec
P64 0.0000000 sec
P65 0.0000000 sec
P66 0.0000000 sec
P67 0.0000000 sec
P68 0.0000000 sec
P69 0.0000000 sec
P70 0.0000000 sec
P71 0.0000000 sec
P72 0.0000000 sec
P73 0.0000000 sec
P74 0.0000000 sec
P75 0.0000000 sec
P76 0.0000000 sec
P77 0.0000000 sec
P78 0.0000000 sec
P79 0.0000000 sec
P80 0.0000000 sec
P81 0.0000000 sec
P82 0.0000000 sec
P83 0.0000000 sec
P84 0.0000000 sec
P85 0.0000000 sec
P86 0.0000000 sec
P87 0.0000000 sec
P88 0.0000000 sec
P89 0.0000000 sec
P90 0.0000000 sec
P91 0.0000000 sec
P92 0.0000000 sec
P93 0.0000000 sec
P94 0.0000000 sec
P95 0.0000000 sec
P96 0.0000000 sec
P97 0.0000000 sec
P98 0.0000000 sec
P99 0.0000000 sec
P100 0.0000000 sec

===== GRADIENT CHANNELS =====
GEX1 0 %
GEX2 0 %
GEX3 0 %
GEX4 0 %
GEX5 0 %
GEX6 0 %
GEX7 0 %
GEX8 0 %
GEX9 0 %
GEX10 0 %
GEX11 0 %
GEX12 0 %
GEX13 0 %
GEX14 0 %
GEX15 0 %
GEX16 0 %
GEX17 0 %
GEX18 0 %
GEX19 0 %
GEX20 0 %
GEX21 0 %
GEX22 0 %
GEX23 0 %
GEX24 0 %
GEX25 0 %
GEX26 0 %
GEX27 0 %
GEX28 0 %
GEX29 0 %
GEX30 0 %
GEX31 0 %
GEX32 0 %
GEX33 0 %
GEX34 0 %
GEX35 0 %
GEX36 0 %
GEX37 0 %
GEX38 0 %
GEX39 0 %
GEX40 0 %
GEX41 0 %
GEX42 0 %
GEX43 0 %
GEX44 0 %
GEX45 0 %
GEX46 0 %
GEX47 0 %
GEX48 0 %
GEX49 0 %
GEX50 0 %
GEX51 0 %
GEX52 0 %
GEX53 0 %
GEX54 0 %
GEX55 0 %
GEX56 0 %
GEX57 0 %
GEX58 0 %
GEX59 0 %
GEX60 0 %
GEX61 0 %
GEX62 0 %
GEX63 0 %
GEX64 0 %
GEX65 0 %
GEX66 0 %
GEX67 0 %
GEX68 0 %
GEX69 0 %
GEX70 0 %
GEX71 0 %
GEX72 0 %
GEX73 0 %
GEX74 0 %
GEX75 0 %
GEX76 0 %
GEX77 0 %
GEX78 0 %
GEX79 0 %
GEX80 0 %
GEX81 0 %
GEX82 0 %
GEX83 0 %
GEX84 0 %
GEX85 0 %
GEX86 0 %
GEX87 0 %
GEX88 0 %
GEX89 0 %
GEX90 0 %
GEX91 0 %
GEX92 0 %
GEX93 0 %
GEX94 0 %
GEX95 0 %
GEX96 0 %
GEX97 0 %
GEX98 0 %
GEX99 0 %
GEX100 0 %

```

**Figure S35.** gCOSY NMR spectrum of thioestrepton Ala2Val-ΔIle1 (125 MHz, CDCl<sub>3</sub>-CD<sub>3</sub>OD 4:1, 25 °C).

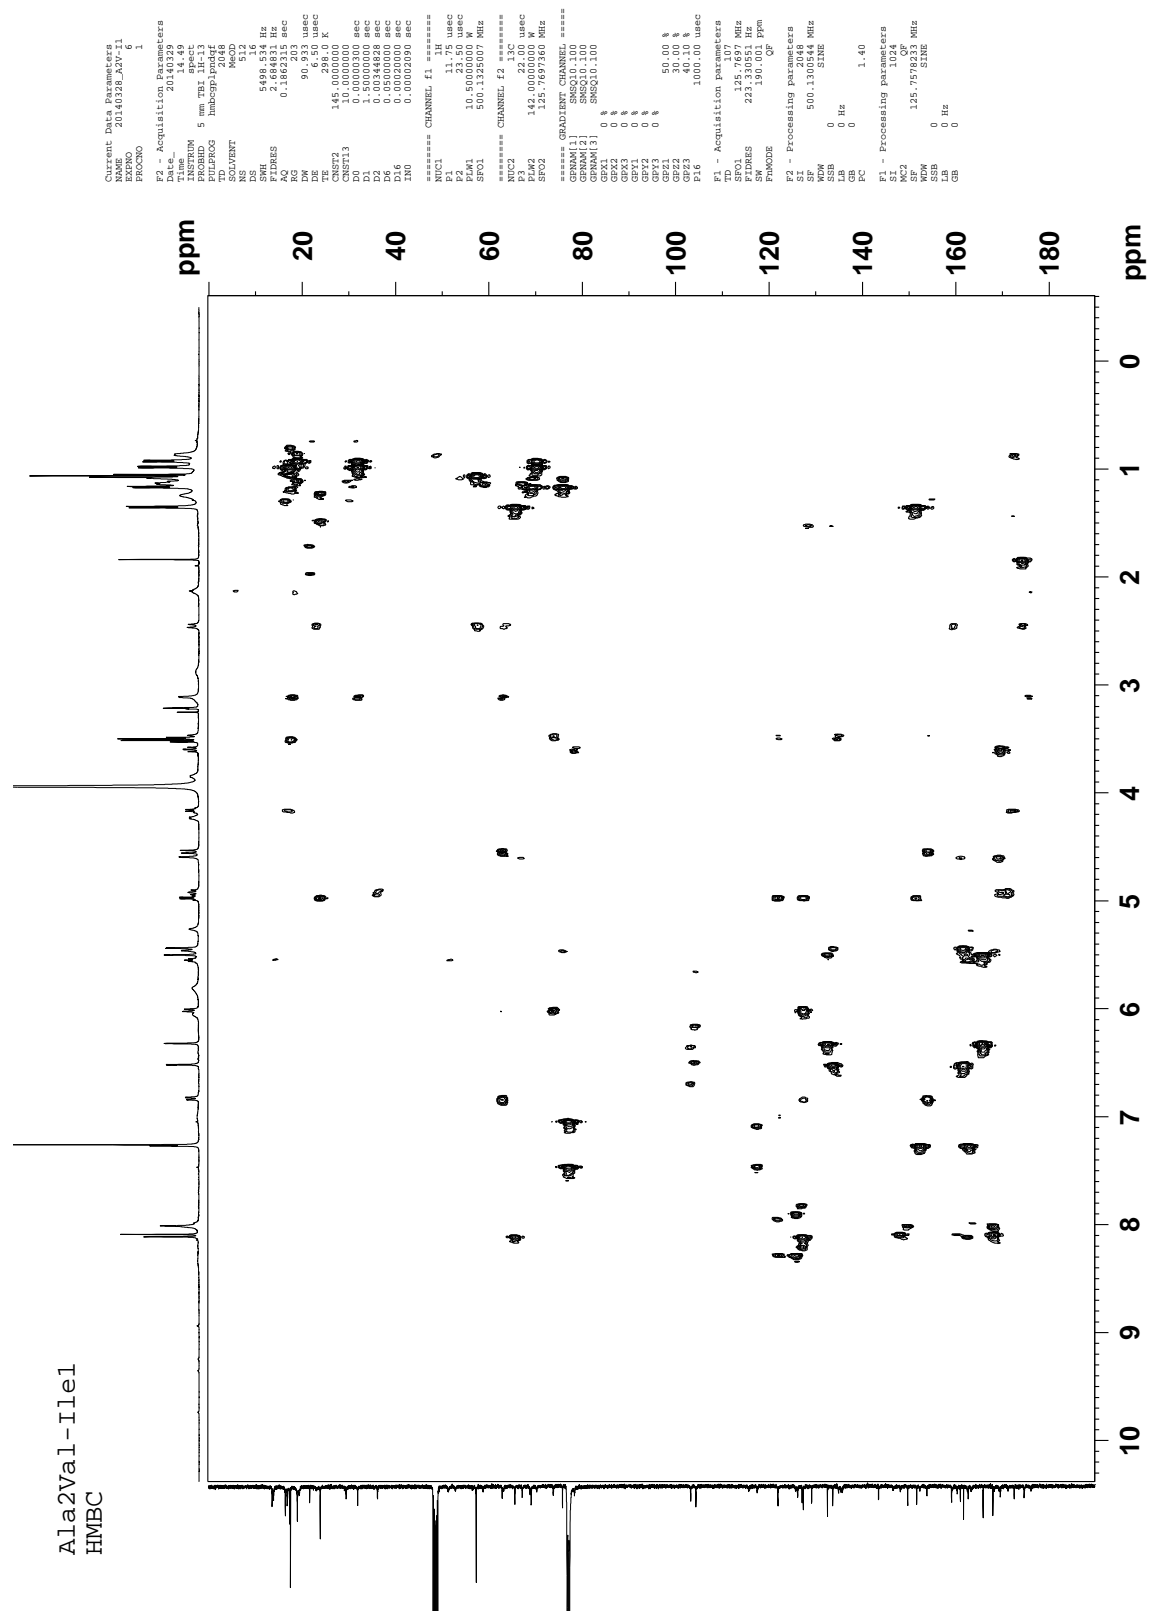

**Figure S36.** gHMBC NMR spectrum of thioStrepton Ala2Val- $\Delta$ Ile1 (125 MHz,  $\text{CDCl}_3\text{-CD}_3\text{OD}$  4:1, 25 °C).

**Table S4.**  $^1\text{H}$  and  $^{13}\text{C}$  NMR assignments of thiostrepton Ala2Val- $\Delta$ Ile1

| Position            | $\delta_{\text{C}}$ [ppm];<br>mult | $\delta_{\text{H}}$ [ppm];<br>(mult, J in Hz)                           | HMBC <sup>a</sup>                         | COSY <sup>b</sup>                                              |
|---------------------|------------------------------------|-------------------------------------------------------------------------|-------------------------------------------|----------------------------------------------------------------|
| <i>Val2</i>         |                                    |                                                                         |                                           |                                                                |
| Val2-1              | 176.1; C q                         |                                                                         |                                           |                                                                |
| Val2-2              | 70.2; CH                           | 3.11 (d, 3.6)                                                           | Val2-1; Val2-3; Val2-4 <sub>B</sub> ; Q-8 | Val2-3                                                         |
| Val2-3              | 31.9; CH                           | 2.17-2.09 (m)                                                           | Val2-1                                    | Val2-2; Val2-4 <sub>A</sub> ; Val2-4 <sub>B</sub>              |
| Val2-4 <sub>A</sub> | 19.3; CH <sub>3</sub>              | 0.98 (d, 6.9)                                                           | Val2-2; Val2-3; Val2-4 <sub>B</sub>       | Val2-3                                                         |
| Val2-4 <sub>B</sub> | 17.5; CH <sub>3</sub>              | 0.92 (d, 6.9)                                                           | Val2-2; Val2-3; Val2-4 <sub>A</sub>       | Val2-3                                                         |
| <i>Dha3</i>         |                                    |                                                                         |                                           |                                                                |
| Dha3-1              | 163.3; C q                         |                                                                         |                                           |                                                                |
| Dha3-2              | 135.4; C q                         |                                                                         |                                           |                                                                |
| Dha3-3              | 115.6; CH <sub>2</sub>             | H <sub>A</sub> : 5.81 (br s)<br>H <sub>B</sub> : 5.26 (br s)            | Dha3-1                                    |                                                                |
| <i>Ala4</i>         |                                    |                                                                         |                                           |                                                                |
| Ala4-1              | 172.5; C q                         |                                                                         |                                           |                                                                |
| Ala4-2              | 49.4; CH                           | 4.16 (q, 7.3)                                                           | Ala4-1; Ala4-3                            | Ala4-3                                                         |
| Ala4-3              | 16.8; CH <sub>3</sub>              | 0.87 (d, 5.8)                                                           | Ala4-1; Ala4-2                            | Ala4-2                                                         |
| <i>Pip</i>          |                                    |                                                                         |                                           |                                                                |
| Pip-2               | 159.1; C q                         |                                                                         |                                           |                                                                |
| Pip-3               | 23.0; CH <sub>2</sub>              | H <sub>A</sub> : 3.53-3.48 (m)<br>H <sub>B</sub> : 2.92-2.83 (m)        |                                           | Pip-4-H <sub>B</sub>                                           |
| Pip-4               | 29.4; CH <sub>2</sub>              | H <sub>A</sub> : 3.88-3.81 (m)<br>H <sub>B</sub> : 2.47-2.42 (m)        | Pip-2; Pip-3; Pip-5; Pip-6                | Pip-3-H <sub>B</sub>                                           |
| Pip-5               | 57.3; C q                          |                                                                         |                                           |                                                                |
| Pip-6               | 63.1; CH                           | 5.26 (br s)                                                             |                                           |                                                                |
| <i>Thz6</i>         |                                    |                                                                         |                                           |                                                                |
| Thz6-1              | 161.0; C q                         |                                                                         |                                           |                                                                |
| Thz6-2              | 149.7; C q                         |                                                                         |                                           |                                                                |
| Thz6-3              | 127.1; CH                          | 8.01 (s)                                                                | Thz6-2; Thz6-4                            |                                                                |
| Thz6-4              | 167.9; C q                         |                                                                         |                                           |                                                                |
| <i>Thr7</i>         |                                    |                                                                         |                                           |                                                                |
| Thr7-1              | 169.5; C q                         |                                                                         |                                           |                                                                |
| Thr7-2              | 58.7; CH                           | 4.59 (d, 2.0)                                                           | Thz6-1; Thr7-1; Thr7-3                    | Thr7-3                                                         |
| Thr7-3              | 67.1; CH                           | 4.26-4.20 (m)                                                           |                                           | Thr7-2; Thr7-4                                                 |
| Thr7-4              | 19.3; CH <sub>3</sub>              | 1.13 (d, 5.5)                                                           | Thr7-2; Thr7-3                            | Thr7-3                                                         |
| <i>Dhb8</i>         |                                    |                                                                         |                                           |                                                                |
| Dhb8-2              | 127.3; C q                         |                                                                         |                                           |                                                                |
| Dhb8-3              | 135.7; CH                          | 6.08-6.03 (m)                                                           | Dhb8-2                                    | Dhb8-4                                                         |
| Dhb8-4              | 19.0; CH <sub>3</sub>              | 1.13-1.09 (m)                                                           |                                           |                                                                |
| <i>Tzn9</i>         |                                    |                                                                         |                                           |                                                                |
| Tzn9-1              | 171.2; C q                         |                                                                         |                                           |                                                                |
| Tzn9-2              | 78.3; CH                           | 4.92 (dd, 11.5, 9.6)                                                    | Tzn9-1; Tzn9-3; Tzn9-4                    | Tzn9-3-H <sub>A</sub> ; Tzn9-3-H <sub>B</sub>                  |
| Tzn9-3              | 36.1; CH <sub>2</sub>              | H <sub>A</sub> : 3.60 (dd, 11.2, 9.1)<br>H <sub>B</sub> : 3.17-3.12 (m) | Tzn9-1; Tzn9-2; Tzn9-4                    | Tzn9-2; Tzn9-3-H <sub>B</sub><br>Tzn9-2; Tzn9-3-H <sub>A</sub> |
| Tzn9-4              | 169.5; C q                         |                                                                         |                                           |                                                                |
| <i>Ile10</i>        |                                    |                                                                         |                                           |                                                                |
| Ile10-2             | 52.8; CH                           | 5.46 (s)                                                                | Ile10-3; Thz11-4                          |                                                                |
| Ile10-3             | 75.8; C q                          |                                                                         |                                           |                                                                |
| Ile10-4             | 69.0; CH                           | 3.88-3.81 (m)                                                           |                                           | Ile10-5                                                        |
| Ile10-5             | 16.4; CH <sub>3</sub>              | 1.17 (d, 6.5)                                                           | Ile10-3; Ile10-4                          | Ile10-4                                                        |
| Ile10-6             | 19.0; CH <sub>3</sub>              | 1.08 (s)                                                                | Ile10-3; Ile10-4                          |                                                                |
| <i>Thz11</i>        |                                    |                                                                         |                                           |                                                                |
| Thz11-1             | 162.6; C q                         |                                                                         |                                           |                                                                |
| Thz11-2             | 149.7; C q                         |                                                                         |                                           |                                                                |
| Thz11-3             | 121.9; CH                          | 8.11 (s)                                                                | Thz11-1; Thz11-2; Thz11-4                 |                                                                |
| Thz11-4             | 168.2; C q                         |                                                                         |                                           |                                                                |
| <i>Thr12</i>        |                                    |                                                                         |                                           |                                                                |
| Thr12-2             | 51.3; CH                           | 5.84-5.77 (m)                                                           |                                           | Thr12-3                                                        |
| Thr12-3             | 69.0; CH                           | 5.55 (pentet, 6.0)                                                      | Thz11-1; Thr12-2; Thr12-4; Q-1            | Thr12-2; Thr12-4                                               |
| Thr12-4             | 13.9; CH <sub>3</sub>              | 1.28-1.21 (m)                                                           |                                           | Thr12-3                                                        |

| Position     | $\delta_C$ [ppm];<br>mult | $\delta_H$ [ppm];<br>(mult, J in Hz)                             | HMBC <sup>a</sup>                    | COSY <sup>b</sup>                                |
|--------------|---------------------------|------------------------------------------------------------------|--------------------------------------|--------------------------------------------------|
| <i>Thz13</i> |                           |                                                                  |                                      |                                                  |
| Thz13-2      | 159.1; C q                |                                                                  |                                      |                                                  |
| Thz13-3      | 125.7; CH                 | 8.01 (s)                                                         | Thz13-4                              |                                                  |
| Thz13-4      | 167.9; C q                |                                                                  |                                      |                                                  |
| <i>Thz15</i> |                           |                                                                  |                                      |                                                  |
| Thz15-1      | 160.3; C q                |                                                                  |                                      |                                                  |
| Thz15-2      | 148.1; C q                |                                                                  |                                      |                                                  |
| Thz15-3      | 126.1; CH                 | 8.09 (s)                                                         | Thz15-1; Thz15-2; Thz15-4            |                                                  |
| Thz15-4      | 168.2; C q                |                                                                  |                                      |                                                  |
| <i>Dha16</i> |                           |                                                                  |                                      |                                                  |
| Dha16-1      | 161.6; C q                |                                                                  |                                      |                                                  |
| Dha16-2      | 133.6; C q                |                                                                  |                                      |                                                  |
| Dha16-3      | 103.2; CH <sub>2</sub>    | H <sub>A</sub> : 6.52 (d, 2.3)<br>H <sub>B</sub> : 5.44 (d, 2.3) | Dha16-1; Dha16-2<br>Dha16-1; Dha16-2 | Dha16-3-H <sub>B</sub><br>Dha16-3-H <sub>A</sub> |
| <i>Dha17</i> |                           |                                                                  |                                      |                                                  |
| Dha17-1      | 165.8; C q                |                                                                  |                                      |                                                  |
| Dha17-2      | 132.5; C q                |                                                                  |                                      |                                                  |
| Dha17-3      | 104.3; CH <sub>2</sub>    | H <sub>A</sub> : 6.32 (d, 1.7)<br>H <sub>B</sub> : 5.50 (d, 1.7) | Dha17-1; Dha17-2<br>Dha17-1; Dha17-2 | Dha17-3-H <sub>B</sub><br>Dha17-3-H <sub>A</sub> |
| <i>Q</i>     |                           |                                                                  |                                      |                                                  |
| Q-1          | 162.6; C q                |                                                                  |                                      |                                                  |
| Q-2          | 151.6; C q                |                                                                  |                                      |                                                  |
| Q-3          | 117.4; CH                 | 7.27 (s)                                                         | Q-1; Q-2; Q-4; Q-10                  |                                                  |
| Q-4          | 152.3; C q                |                                                                  |                                      |                                                  |
| Q-5          | 127.3; C q                |                                                                  |                                      |                                                  |
| Q-6          | 121.9; CH                 | 6.83 (dd, 10.2, 2.5)                                             | Q-5; Q-8; Q-10                       | Q-7; Q-8                                         |
| Q-7          | 134.9; CH                 | 6.01 (m)                                                         | Q-5; Q-8; Q-9                        | Q-6; Q-8                                         |
| Q-8          | 62.8; CH                  | 3.50-3.45 (m)                                                    | Q-6; Q-7; Q-9; Q-10                  | Q-6; Q-7; Q-9                                    |
| Q-9          | 73.8; CH                  | 4.54 (d, 12.3)                                                   | Q-8; Q-10                            | Q-8                                              |
| Q-10         | 153.8; C q                |                                                                  |                                      |                                                  |
| Q-11         | 65.6; CH                  | 4.97 (q, 6.5)                                                    | Q-2; Q-5; Q-6; Q-12                  | Q-12                                             |
| Q-12         | 23.9; CH <sub>3</sub>     | 1.35 (d, 6.6)                                                    | Q-4; Q-11                            | Q-11                                             |

<sup>a</sup> HMBC correlations are from the proton to the indicated carbon.

<sup>b</sup> COSY correlations are from the proton to the proton attached to the indicated position.

**Figure S37.** HPLC-MS analysis of a crude culture extract from *S. laurentii* NDS1/int-A2L.

(A) Structure of thiostrepton Ala2Leu- $\Delta$ Ile1. The expected  $[M+H]^+$   $m/z$  is 1593.5 and the expected  $[M+2H]^{2+}$   $m/z$  is 797.2.

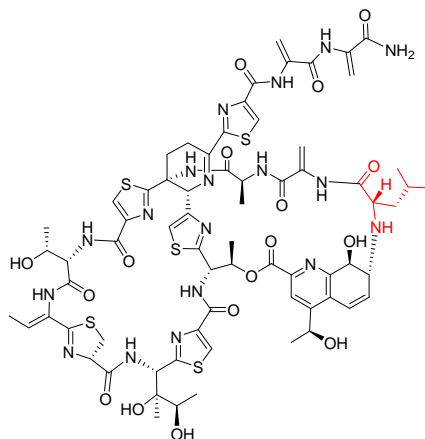

(B) Total ion chromatogram of *S. laurentii* NDS1/int-A2L crude extract.

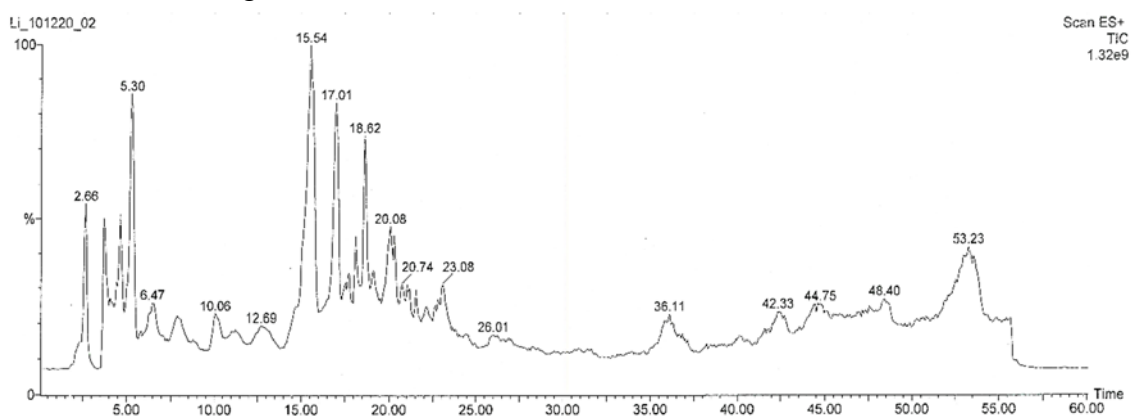

(C) Chromatogram extracted for  $m/z$  797.2, the calculated  $[M+2H]^{2+}$  ion of thiostrepton Ala2Leu- $\Delta$ Ile1.

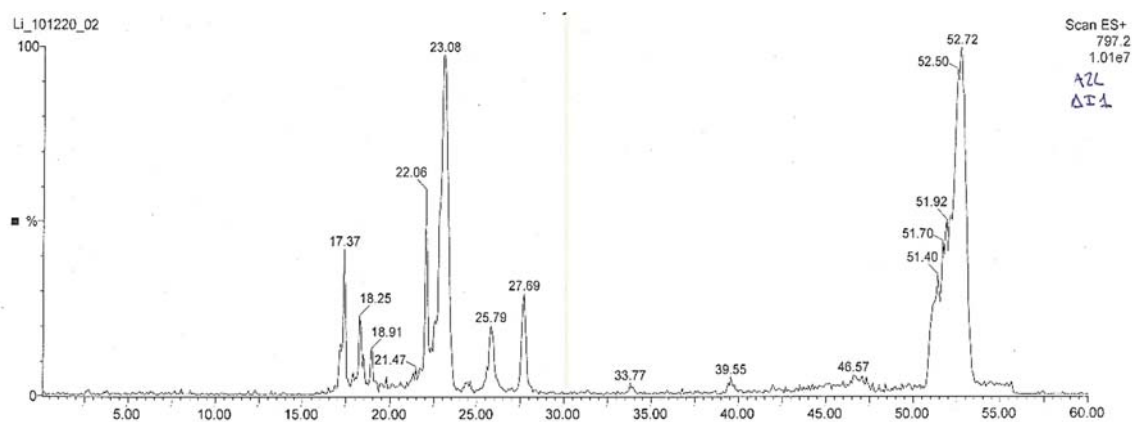



(D) Mass spectrum of the thiostrepton Ala2Leu- $\Delta$ Ile1 extract eluting at  $t_R = 25.79$ , which contains a +2 ion, the ionization state typically observed for thiostrepton metabolites in ESI-MS analysis, at about 797.2 and consistent with that expected for the ring-contracted thiostrepton metabolite. Another +2 ion at about 797.2 was detected at  $t_R$  of 22.06.

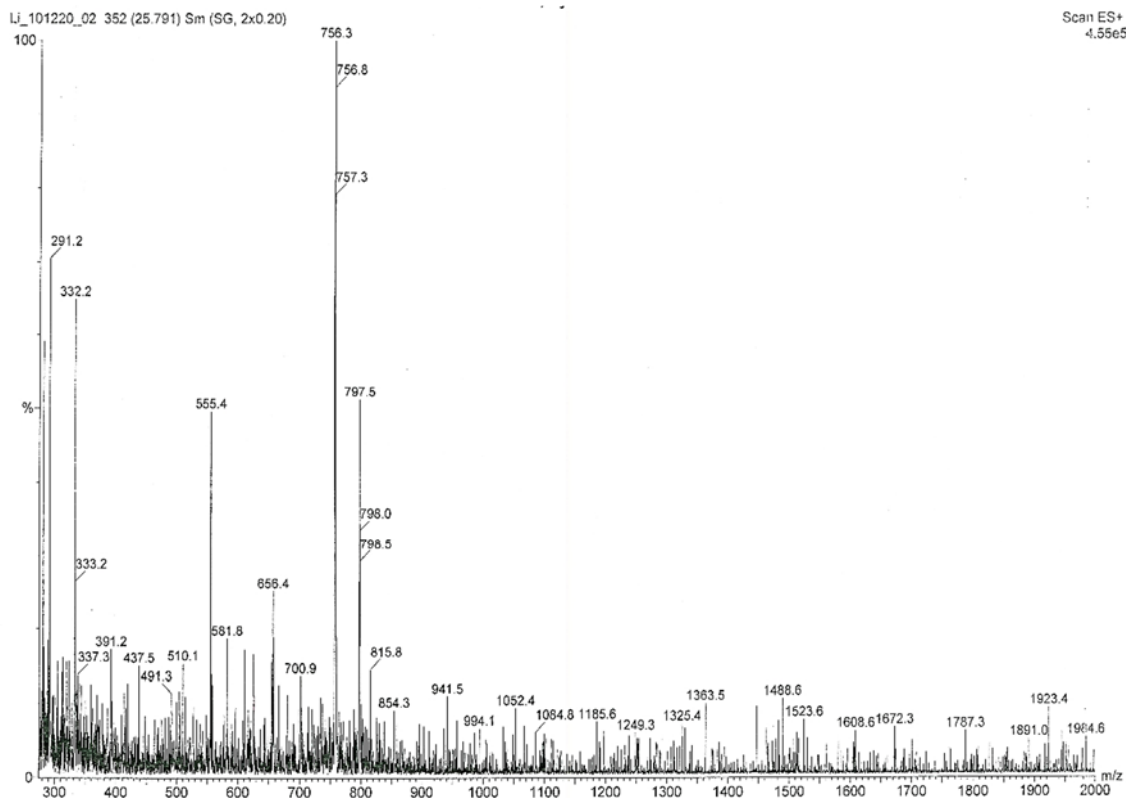

**Figure S38.** HPLC-MS analysis of a crude culture extract from *S. laurentii* NDS1/int-A2M.

(A) Structure of thiostrepton Ala2Met- $\Delta$ Ile1. The expected  $[M+H]^+$   $m/z$  is 1611.4 and the expected  $[M+2H]^{2+}$   $m/z$  is 806.2.

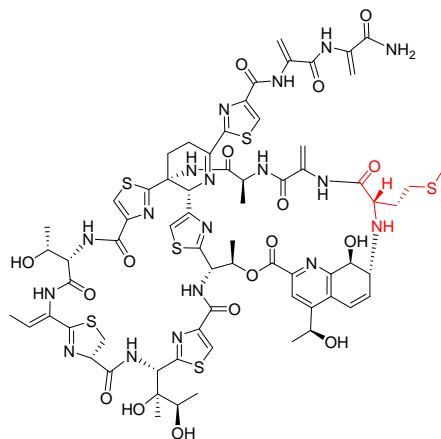

(B) Total ion chromatogram of *S. laurentii* NDS1/int-A2M crude extract.

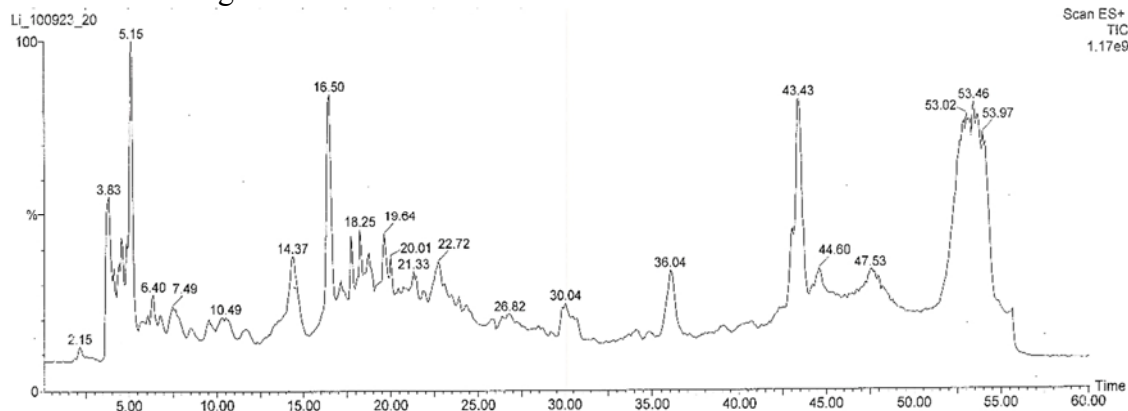

(C) Chromatogram extracted for  $m/z$  806.2, the calculated  $[M+2H]^{2+}$  ion of thiostrepton Ala2Met- $\Delta$ Ile1.

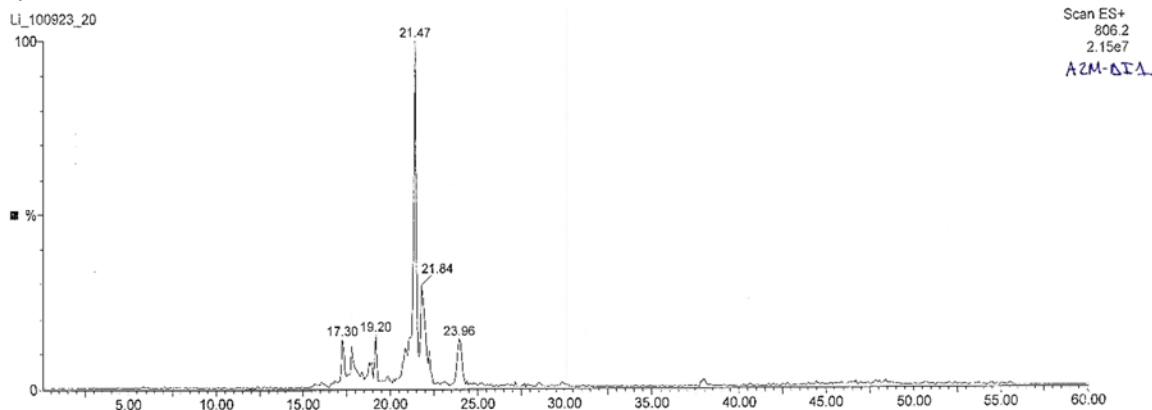

(D) Mass spectrum of the thiostrepton Ala2Met- $\Delta$ Ile1 extract eluting at  $t_R = 21.47$ , which contains a +2 ion, the ionization state typically observed for thiostrepton metabolites in ESI-MS analysis, at about 806.2 and consistent with the mass expected for the ring-contracted thiostrepton metabolite. Other +2 ions at about 806.2 were detected at  $t_R$ 's of 21.84 and 23.96.

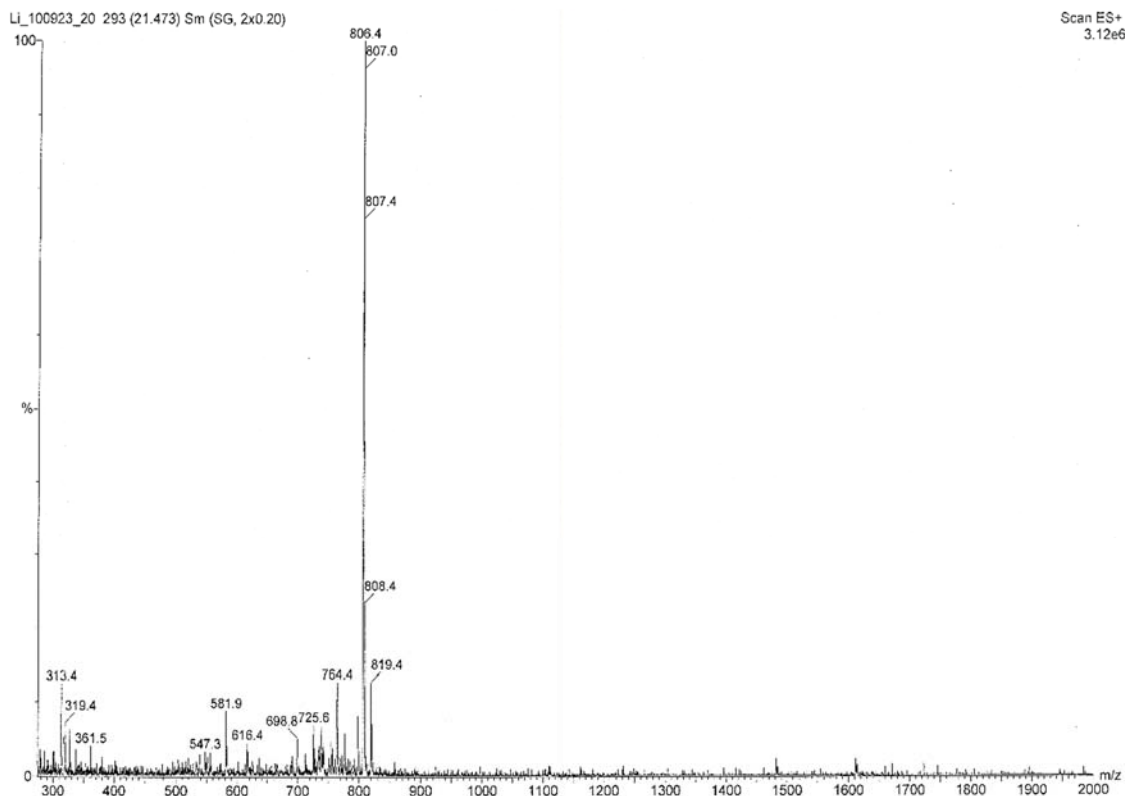

**Figure S39.** HPLC-MS analysis of a crude culture extract from *S. laurentii* NDS1/int-A2F.

(A) Structure of thiostrepton Ala2Phe- $\Delta$ Ile1. The expected  $[M+H]^+$   $m/z$  is 1627.4 and the expected  $[M+2H]^{2+}$   $m/z$  is 814.2.

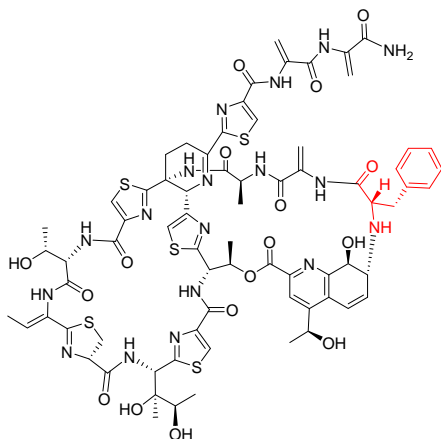

(B) Total ion chromatogram of *S. laurentii* NDS1/int-A2F crude extract.

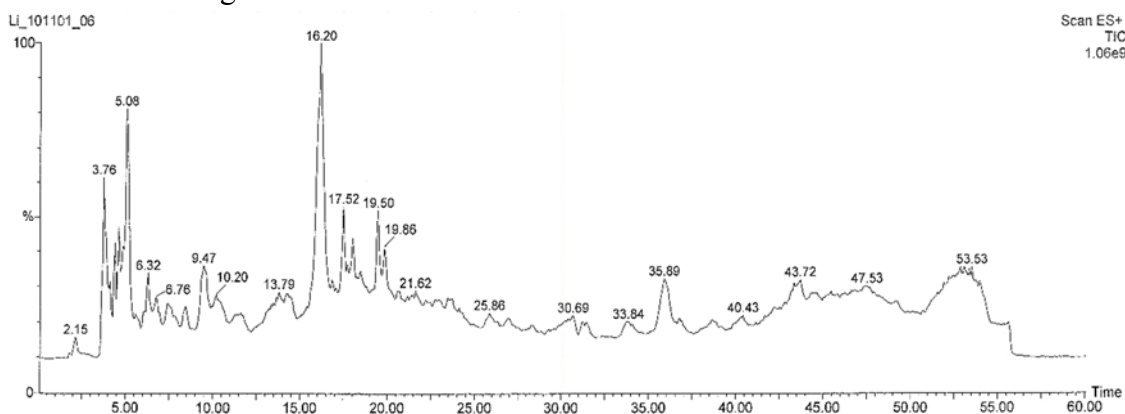

(C) Chromatogram extracted for  $m/z$  814.2, the calculated  $[M+2H]^{2+}$  ion of thiostrepton Ala2Phe- $\Delta$ Ile1.

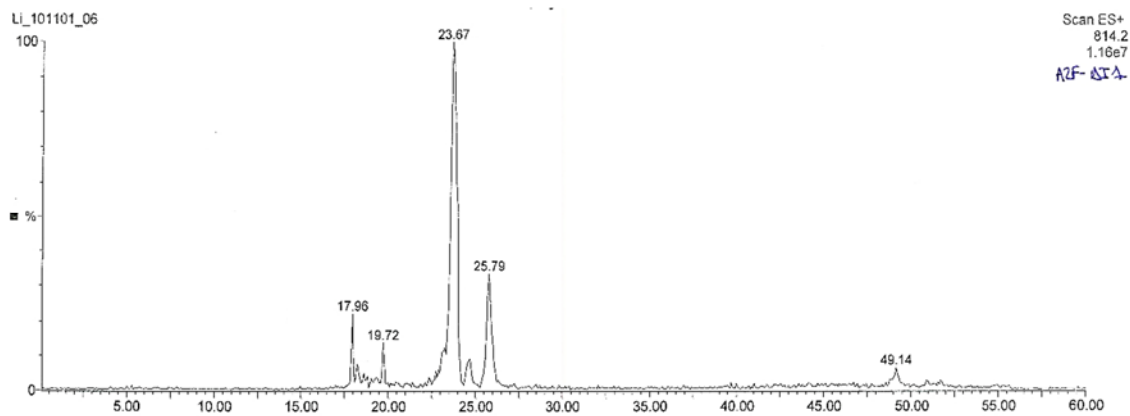

(D) Mass spectrum of the thiostrepton Ala2Phe-ΔIle1 extract eluting at  $t_R = 23.67$ , which contains a +2 ion, the ionization state typically observed for thiostrepton metabolites in ESI-MS analysis, at about 814.2 and a mass consistent with that expected for the ring-contracted thiostrepton metabolite. Another +2 ion at about 814.2 was detected at a  $t_R$  of 25.79.

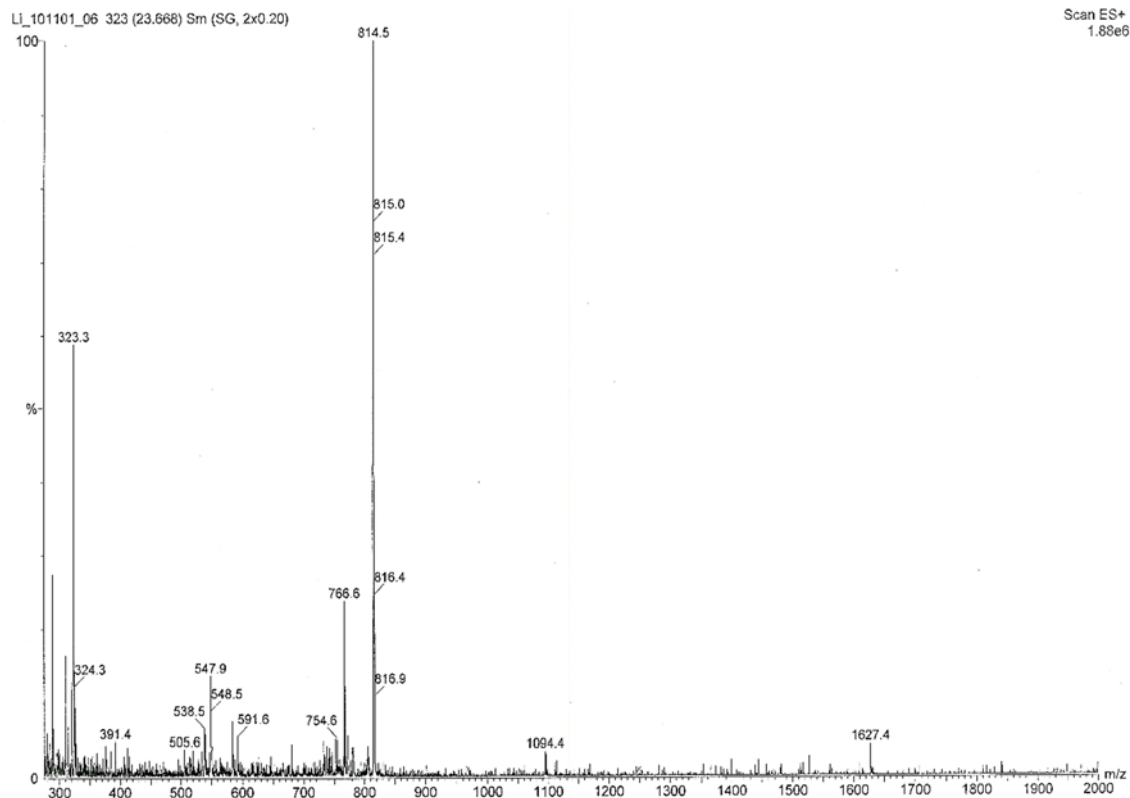

**Figure S40.** A representative MS analysis revealing the presence of shunt metabolites of thiostrepton biosynthesis. MS analysis of a crude culture extract from *S. laurentii* NDS1/int-A2H is shown.

(A) Structures of thiostrepton Ala2His and the two predicted shunt metabolites SL-1 (the wild-type analog to SL105-1 reported for the TsrA Thr7Ala variant) and SL-2 (a shunt metabolite bearing an epoxidized quinaldic acid moiety). Thiostreptons have typically been observed as the +2 ion by our HPLC-MS analysis and as the +1 ion by our MALDI-MS analysis. The expected thiostrepton Ala2His  $[M+2H]^{2+}$   $m/z$  is 865.8 and the  $[M+H]^+$   $m/z$  is 1730.5; the expected SL-1  $[M+2H]^{2+}$   $m/z$  is 733.2 and  $[M+H]^+$   $m/z$  is 1465.4; and the expected SL-2  $[M+2H]^{2+}$   $m/z$  is 741.2 and  $[M+H]^+$   $m/z$  is 1481.4.

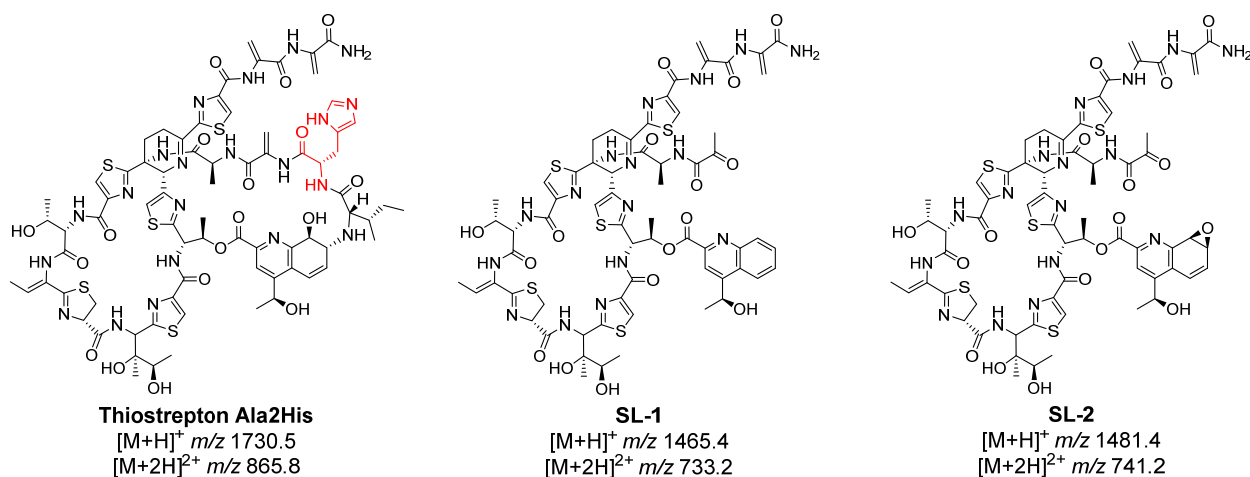

(B) Total ion chromatogram of *S. laurentii* NDS1/int-A2H crude extract.

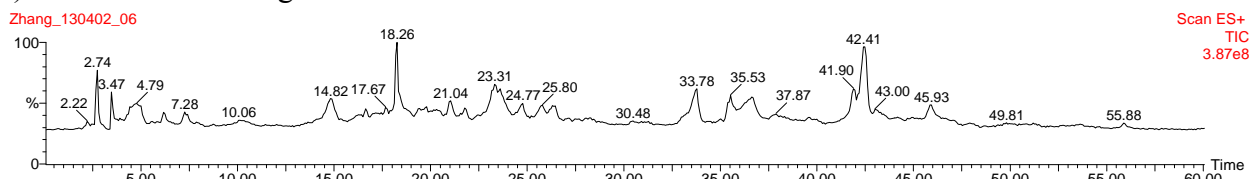

(C) Chromatogram extracted for  $m/z$  865.8, the calculated  $[M+2H]^{2+}$  ion of thiostrepton Ala2His.

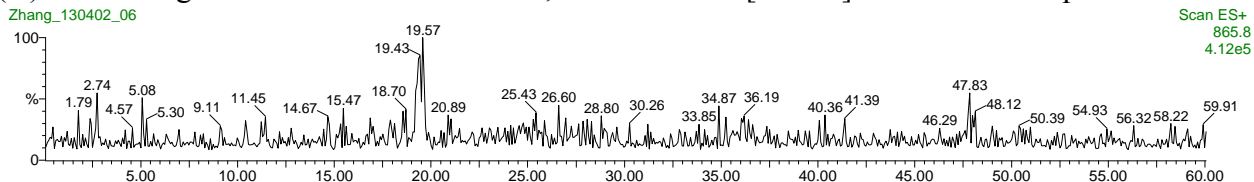

(D) Chromatogram extracted for  $m/z$  733.2, the calculated  $[M+2H]^{2+}$  ion of SL-1.

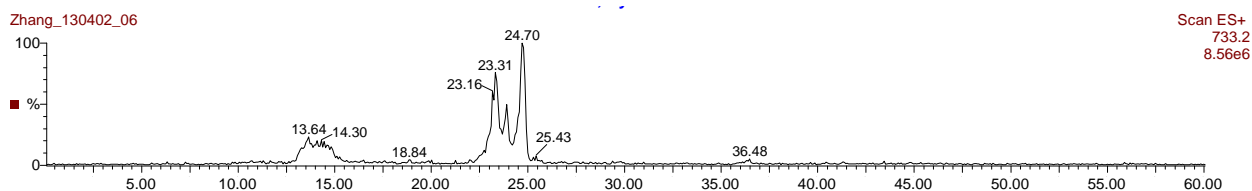

(E) Mass spectrum of the thiostrepton Ala2His extract eluting at  $t_R = 24.70$ , which contains a +2 ion at  $m/z$  733.4, consistent with that predicted for the shunt metabolite SL-1. HR-MALDI-MS analysis of partially purified SL-1 gave  $[M+H]^+$   $m/z$  1465.3564 (calculated 1465.3681, -8.0 ppm).

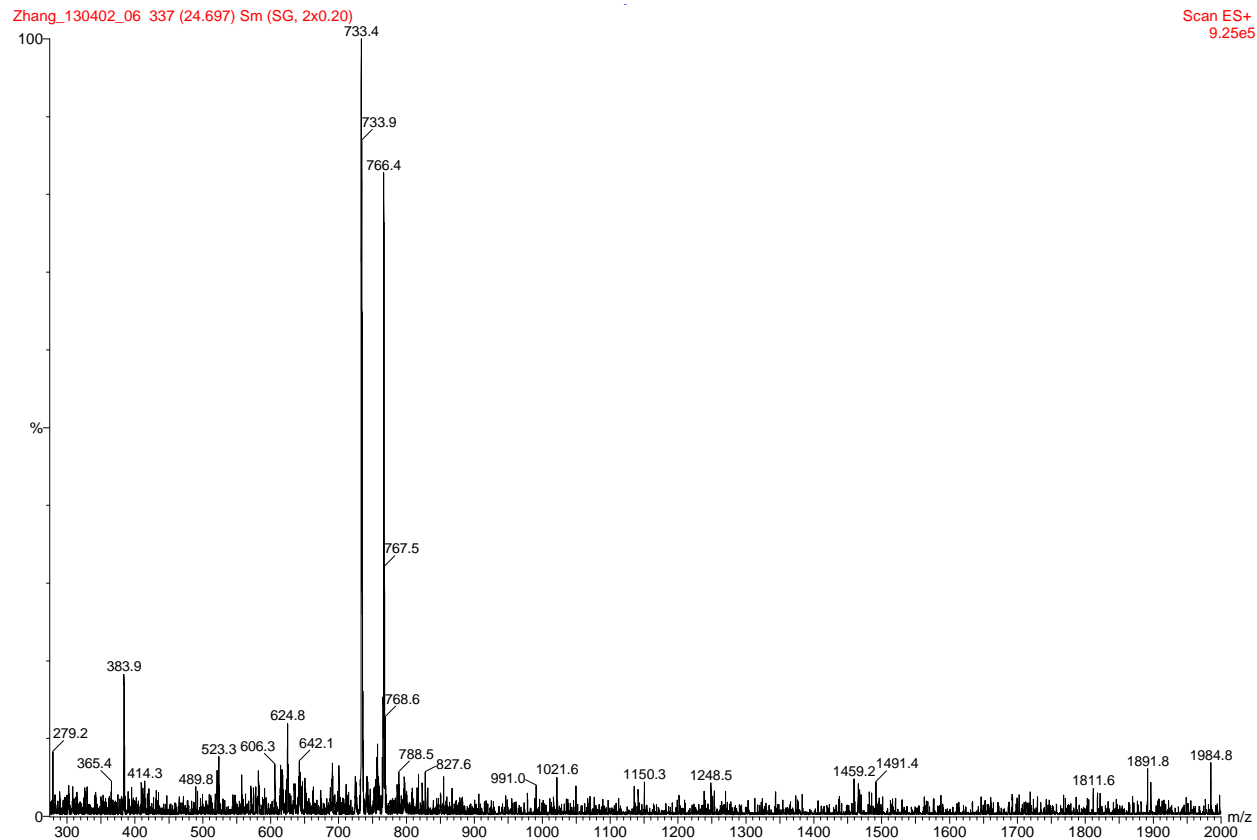

(F) Chromatogram extracted for  $m/z$  741.2, the calculated  $[M+2H]^{2+}$  ion of SL-2.

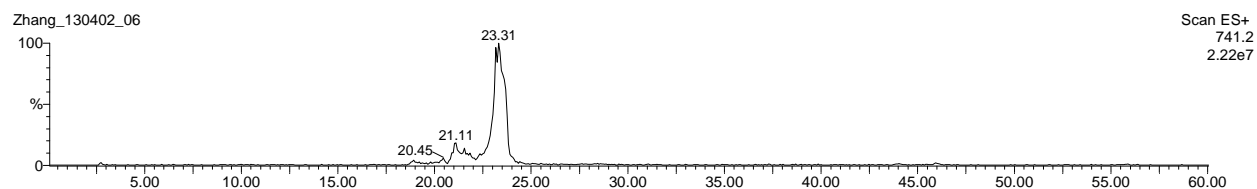

(G) Mass spectrum of the thiostrepton Ala2His extract eluting at  $t_R = 23.31$ , which contains a +2 ion at  $m/z$  741.4, consistent with that predicted for the shunt metabolite SL-2. HR-MALDI-MS analysis of partially purified SL-2 gave  $[M+H]^+$   $m/z$  1481.3560 (calculated 1481.3630, -4.7 ppm).

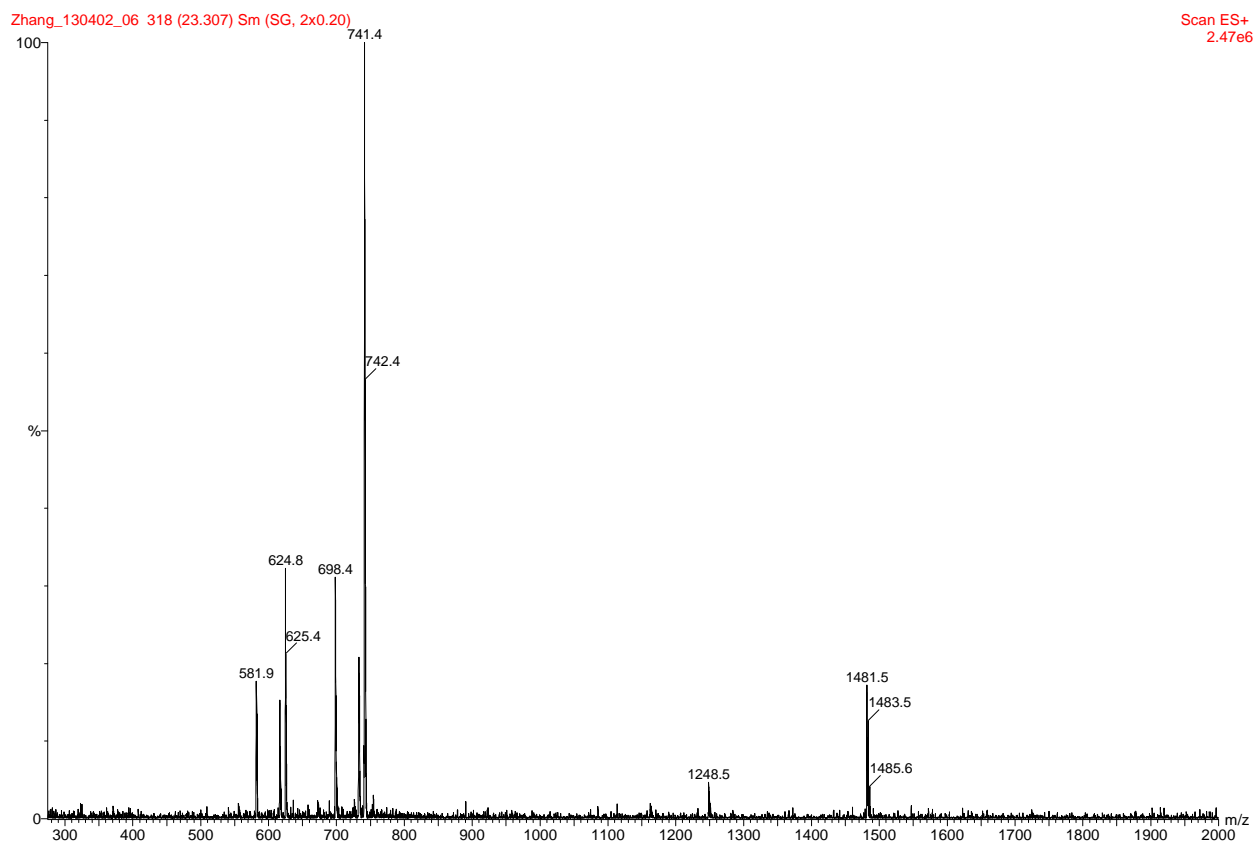



**Table S5.** Summary of HR-MS results of thiostrepton Ala2 analogues

| Thiostrepton variant | Analysis  | Molecular Formula                                                              | Calculated [M+Na] <sup>+</sup> | Observed [M+Na] <sup>+</sup> | ppm Error |
|----------------------|-----------|--------------------------------------------------------------------------------|--------------------------------|------------------------------|-----------|
| Thiostrepton Ala2Dha | HR-ESI-MS | C <sub>72</sub> H <sub>83</sub> N <sub>19</sub> O <sub>18</sub> S <sub>5</sub> | 1684.4665                      | 1684.4718                    | 3.1       |

  

| Thiostrepton variant       | Analysis    | Molecular formula                                                              | Calculated [M+H] <sup>+</sup> | Observed [M+H] <sup>+</sup> |      |
|----------------------------|-------------|--------------------------------------------------------------------------------|-------------------------------|-----------------------------|------|
| Thiostrepton Ala2Dhb       | HR-MALDI-MS | C <sub>73</sub> H <sub>83</sub> N <sub>19</sub> O <sub>18</sub> S <sub>5</sub> | 1676.5002                     | 1676.5043                   | 2.4  |
| Thiostrepton Ala2Ile-ΔIle1 | HR-MALDI-MS | C <sub>69</sub> H <sub>80</sub> N <sub>18</sub> O <sub>17</sub> S <sub>5</sub> | 1593.4631                     | 1593.4673                   | 2.6  |
| Thiostrepton Ala2Met       | HR-MALDI-MS | C <sub>74</sub> H <sub>89</sub> N <sub>19</sub> O <sub>18</sub> S <sub>6</sub> | 1724.5036                     | 1724.4999                   | -2.1 |
| Thiostrepton Ala2Phe       | HR-MALDI-MS | C <sub>78</sub> H <sub>89</sub> N <sub>19</sub> O <sub>18</sub> S <sub>5</sub> | 1740.5315                     | 1740.5244                   | -4.1 |
| Thiostrepton Ala2Tyr       | HR-MALDI-MS | C <sub>78</sub> H <sub>89</sub> N <sub>19</sub> O <sub>19</sub> S <sub>5</sub> | 1756.5264                     | 1756.5267                   | 0.2  |
| Thiostrepton Ala2Val-ΔIle1 | HR-MALDI-MS | C <sub>68</sub> H <sub>78</sub> N <sub>18</sub> O <sub>17</sub> S <sub>5</sub> | 1579.4474                     | 1579.4519                   | 2.8  |

**Table S6.** Titers of the thiostrepton Ala2 analogues

Fermentation of each *S. laurentii* NDS1/int-A2X variant was carried out in two sets of triplicate and crude chloroform extracts were prepared. The yields of all thiostrepton analogues were quantified by HPLC against a standard calibration curve of thiostrepton A assuming similar spectral properties for each derivative.

| Compound       | Titer (mg/L) |
|----------------|--------------|
| Thiostrepton A | 115 ± 35     |
| Ala2Dha        | 301 ± 7      |
| Ala2Dhb        | 39 ± 9       |
| Ala2Gly        | 19 ± 3       |
| Ala2Ile-ΔIle1  | 34 ± 4       |
| Ala2Met        | 3.1 ± 0.2    |
| Ala2Phe        | 2.5 ± 0.6    |
| Ala2Tyr        | 1.7 ± 0.6    |
| Ala2Val-ΔIle1  | 51 ± 16      |

**Table S7.** Aqueous solubilities of thiostrepton Ala2 analogues

The kinetic aqueous solubilities of thiostrepton A and its analogues were measured as described previously.<sup>4</sup> 1 mM DMSO stock solutions of thiostrepton A and its analogues were quantified by their absorbance at 280 nm using an extinction coefficient of 0.027 cm<sup>-1</sup>μM<sup>-1</sup>, assuming similar spectral properties for the compounds.<sup>6</sup> The solution was diluted with buffer (10 mM 3-(*N*-morpholino)propanesulfonic acid (MOPS), pH 7.0, 5 mM MgCl<sub>2</sub>, 200 mM KCl, and 5% DMSO) to a nominal concentration of 20 μM. The resulting mixture was incubated at 25 °C for 2 h, then the sample was centrifuged at 14,000 rpm (18,000 *x g*) at 25 °C for 10 min. The absorbance of the supernatant at 280 nm was used to define the solubility of a thiostrepton analogue. Each analysis was performed at least in triplicate.

| Compound       | Water solubility (μM) |
|----------------|-----------------------|
| Thiostrepton A | 8.10 ± 0.24           |
| Ala2Dha        | 4.14 ± 0.28           |
| Ala2Dhb        | 11.10 ± 0.27          |
| Ala2Gly        | 16.79 ± 0.60          |
| Ala2Ile-ΔIle1  | 10.18 ± 0.36          |
| Ala2Met        | 13.62 ± 0.38          |
| Ala2Phe        | 4.71 ± 0.13           |
| Ala2Tyr        | 0.92 ± 0.10           |
| Ala2Val-ΔIle1  | 3.28 ± 0.22           |

**Table S8.** Strains and plasmids used in this study

| Strain/Plasmid                          | Description                                                         | Reference or source    |
|-----------------------------------------|---------------------------------------------------------------------|------------------------|
| <i>Streptomyces</i> strains             |                                                                     |                        |
| <i>S. laurentii</i> ATCC 31255          | Wild-type, thiostrepton A producer                                  | ATCC                   |
| <i>S. laurentii</i> NDS1                | <i>S. laurentii</i> containing an in-frame deletion of <i>tsrA</i>  | <sup>2</sup>           |
| <i>S. laurentii</i> NDS1/int-3A101      | <i>S. laurentii</i> NDS1 containing int-3A101 (A2G)                 | <sup>2</sup>           |
| <i>S. laurentii</i> NDS1/int-A2C        | <i>S. laurentii</i> NDS1 containing int-A2C                         | This study             |
| <i>S. laurentii</i> NDS1/int-A2D        | <i>S. laurentii</i> NDS1 containing int-A2D                         | This study             |
| <i>S. laurentii</i> NDS1/int-A2E        | <i>S. laurentii</i> NDS1 containing int-A2E                         | This study             |
| <i>S. laurentii</i> NDS1/int-A2F        | <i>S. laurentii</i> NDS1 containing int-A2F                         | This study             |
| <i>S. laurentii</i> NDS1/int-A2H        | <i>S. laurentii</i> NDS1 containing int-A2H                         | This study             |
| <i>S. laurentii</i> NDS1/int-A2I        | <i>S. laurentii</i> NDS1 containing int-A2I                         | This study             |
| <i>S. laurentii</i> NDS1/int-A2K        | <i>S. laurentii</i> NDS1 containing int-A2K                         | This study             |
| <i>S. laurentii</i> NDS1/int-A2L        | <i>S. laurentii</i> NDS1 containing int-A2L                         | This study             |
| <i>S. laurentii</i> NDS1/int-A2M        | <i>S. laurentii</i> NDS1 containing int-A2M                         | This study             |
| <i>S. laurentii</i> NDS1/int-A2N        | <i>S. laurentii</i> NDS1 containing int-A2N                         | This study             |
| <i>S. laurentii</i> NDS1/int-A2P        | <i>S. laurentii</i> NDS1 containing int-A2P                         | This study             |
| <i>S. laurentii</i> NDS1/int-A2Q        | <i>S. laurentii</i> NDS1 containing int-A2Q                         | This study             |
| <i>S. laurentii</i> NDS1/int-A2R        | <i>S. laurentii</i> NDS1 containing int-A2R                         | This study             |
| <i>S. laurentii</i> NDS1/int-A2S        | <i>S. laurentii</i> NDS1 containing int-A2S                         | This study             |
| <i>S. laurentii</i> NDS1/int-A2T        | <i>S. laurentii</i> NDS1 containing int-A2T                         | This study             |
| <i>S. laurentii</i> NDS1/int-A2V        | <i>S. laurentii</i> NDS1 containing int-A2V                         | This study             |
| <i>S. laurentii</i> NDS1/int-A2W        | <i>S. laurentii</i> NDS1 containing int-A2W                         | This study             |
| <i>S. laurentii</i> NDS1/int-A2Y        | <i>S. laurentii</i> NDS1 containing int-A2Y                         | This study             |
| <i>E. coli</i> strains                  |                                                                     |                        |
| EPI 300                                 | Host for inducing high copy number of a fosmid                      | Epicentre <sup>®</sup> |
| BW25113/pKD46                           | Host for PCR-targeted disruption of a gene from a fosmid or plasmid | <sup>7</sup>           |
| ET12567/pUZ8002                         | Host for conjugation with <i>Streptomyces</i> species               | <sup>1</sup>           |
| Strains used for antimicrobial assays   |                                                                     |                        |
| <i>Bacillus</i> sp. ATCC 27859          | Wild-type                                                           | ATCC                   |
| <i>Escherichia coli</i> ATCC 27856      | Wild-type                                                           | ATCC                   |
| <i>Staphylococcus aureus</i> ATCC 10537 | Methicillin-resistant                                               | ATCC                   |
| <i>Enterococcus faecium</i> ATCC 12952  | Vancomycin-resistant                                                | ATCC                   |
| Plasmids                                |                                                                     |                        |

|               |                                                                                                                                                          |                      |
|---------------|----------------------------------------------------------------------------------------------------------------------------------------------------------|----------------------|
| pSC-B-amp/kan | A routine vector from StrataClone Blunt PCR Cloning Kit, for cloning blunt-end PCR product                                                               | Agilent Technologies |
| int-3A10      | A fosmid containing the entire <i>tsr</i> gene cluster and all essential genes for the conjugal transfer and integration into a streptomycete chromosome | 2                    |
| int-3A100     | Derived from int-3A10, <i>tsrA</i> is replaced by <i>chl<sup>R</sup>-sacB</i> cassette                                                                   | 2                    |
| pCL61         | pSC-B-amp/kan containing the <i>tsrA</i> variant encoding the Ala2Gly mutation                                                                           | 2                    |
| int-3A101     | Derived from int-3A100. The <i>chl<sup>R</sup>-sacB</i> cassette is replaced by the <i>tsrA</i> variant encoding the Ala2Gly mutation                    | 2                    |
| pA2C          | pSC-B-amp/kan containing the <i>tsrA</i> variant encoding the Ala2Cys mutation                                                                           | This study           |
| pA2D          | pSC-B-amp/kan containing the <i>tsrA</i> variant encoding the Ala2Asp mutation                                                                           | This study           |
| pA2E          | pSC-B-amp/kan containing the <i>tsrA</i> variant encoding the Ala2Glu mutation                                                                           | This study           |
| pA2F          | pSC-B-amp/kan containing the <i>tsrA</i> variant encoding the Ala2Phe mutation                                                                           | This study           |
| pA2H          | pSC-B-amp/kan containing the <i>tsrA</i> variant encoding the Ala2His mutation                                                                           | This study           |
| pA2I          | pSC-B-amp/kan containing the <i>tsrA</i> variant encoding the Ala2Ile mutation                                                                           | This study           |
| pA2K          | pSC-B-amp/kan containing the <i>tsrA</i> variant encoding the Ala2Lys mutation                                                                           | This study           |
| pA2L          | pSC-B-amp/kan containing the <i>tsrA</i> variant encoding the Ala2Leu mutation                                                                           | This study           |
| pA2M          | pSC-B-amp/kan containing the <i>tsrA</i> variant encoding the Ala2Met mutation                                                                           | This study           |
| pA2N          | pSC-B-amp/kan containing the <i>tsrA</i> variant encoding the Ala2Asn mutation                                                                           | This study           |
| pA2P          | pSC-B-amp/kan containing the <i>tsrA</i> variant encoding the Ala2Pro mutation                                                                           | This study           |
| pA2Q          | pSC-B-amp/kan containing the <i>tsrA</i> variant encoding the Ala2Gln mutation                                                                           | This study           |
| pA2R          | pSC-B-amp/kan containing the <i>tsrA</i> variant encoding the Ala2Arg mutation                                                                           | This study           |
| pA2S          | pSC-B-amp/kan containing the <i>tsrA</i> variant encoding the Ala2Ser mutation                                                                           | This study           |
| pA2T          | pSC-B-amp/kan containing the <i>tsrA</i> variant encoding the Ala2Thr mutation                                                                           | This study           |
| pA2V          | pSC-B-amp/kan containing the <i>tsrA</i> variant encoding the Ala2Val mutation                                                                           | This study           |
| pA2W          | pSC-B-amp/kan containing the <i>tsrA</i> variant encoding the Ala2Trp mutation                                                                           | This study           |
| pA2Y          | pSC-B-amp/kan containing the <i>tsrA</i> variant encoding the Ala2Tyr mutation                                                                           | This study           |
| int-A2C       | Derived from int-3A100. The <i>chl<sup>R</sup>-sacB</i> cassette is replaced by the <i>tsrA</i> variant encoding the Ala2Cys mutation                    | This study           |
| int-A2D       | Derived from int-3A100. The <i>chl<sup>R</sup>-sacB</i> cassette is replaced by the <i>tsrA</i> variant encoding the Ala2Asp mutation                    | This study           |
| int-A2E       | Derived from int-3A100. The <i>chl<sup>R</sup>-sacB</i> cassette is replaced by the <i>tsrA</i> variant encoding the Ala2Glu mutation                    | This study           |
| int-A2F       | Derived from int-3A100. The <i>chl<sup>R</sup>-sacB</i> cassette is replaced by the <i>tsrA</i> variant encoding the Ala2Phe mutation                    | This study           |
| int-A2H       | Derived from int-3A100. The <i>chl<sup>R</sup>-sacB</i> cassette is replaced by the <i>tsrA</i> variant encoding the Ala2His mutation                    | This study           |
| int-A2I       | Derived from int-3A100. The <i>chl<sup>R</sup>-sacB</i> cassette is replaced by the <i>tsrA</i> variant encoding the Ala2Ile mutation                    | This study           |
| int-A2K       | Derived from int-3A100. The <i>chl<sup>R</sup>-sacB</i> cassette is replaced by the <i>tsrA</i> variant encoding the Ala2Lys mutation                    | This study           |
| int-A2L       | Derived from int-3A100. The <i>chl<sup>R</sup>-sacB</i> cassette is replaced by the <i>tsrA</i> variant encoding the Ala2Leu mutation                    | This study           |
| int-A2M       | Derived from int-3A100. The <i>chl<sup>R</sup>-sacB</i> cassette is replaced by the <i>tsrA</i> variant encoding the Ala2Met mutation                    | This study           |
| int-A2N       | Derived from int-3A100. The <i>chl<sup>R</sup>-sacB</i> cassette is replaced by the <i>tsrA</i> variant encoding the Ala2Asn mutation                    | This study           |
| int-A2P       | Derived from int-3A100. The <i>chl<sup>R</sup>-sacB</i> cassette is replaced by the <i>tsrA</i> variant encoding the Ala2Pro mutation                    | This study           |

|         |                                                                                                                                       |            |
|---------|---------------------------------------------------------------------------------------------------------------------------------------|------------|
| int-A2Q | Derived from int-3A100. The <i>chl<sup>R</sup>-sacB</i> cassette is replaced by the <i>tsrA</i> variant encoding the Ala2Gln mutation | This study |
| int-A2R | Derived from int-3A100. The <i>chl<sup>R</sup>-sacB</i> cassette is replaced by the <i>tsrA</i> variant encoding the Ala2Arg mutation | This study |
| int-A2S | Derived from int-3A100. The <i>chl<sup>R</sup>-sacB</i> cassette is replaced by the <i>tsrA</i> variant encoding the Ala2Ser mutation | This study |
| int-A2T | Derived from int-3A100. The <i>chl<sup>R</sup>-sacB</i> cassette is replaced by the <i>tsrA</i> variant encoding the Ala2Thr mutation | This study |
| int-A2V | Derived from int-3A100. The <i>chl<sup>R</sup>-sacB</i> cassette is replaced by the <i>tsrA</i> variant encoding the Ala2Val mutation | This study |
| int-A2W | Derived from int-3A100. The <i>chl<sup>R</sup>-sacB</i> cassette is replaced by the <i>tsrA</i> variant encoding the Ala2Trp mutation | This study |
| int-A2Y | Derived from int-3A100. The <i>chl<sup>R</sup>-sacB</i> cassette is replaced by the <i>tsrA</i> variant encoding the Ala2Tyr mutation | This study |

**Table S9.** Primers used in this study

| Primer        | Sequence                                                                                                                                                              | Description                                                                                                                                                                 |
|---------------|-----------------------------------------------------------------------------------------------------------------------------------------------------------------------|-----------------------------------------------------------------------------------------------------------------------------------------------------------------------------|
| A2X           | 5'-ACTACATGGACGAGACGCTGCTCGACGGTGAGGACCTGACCGTACACGATGATC <u>NNSTCCGCCTCCTGCAC</u> CACCTGCATCTGCACCTGCAGCTGCAGCTCCTGAGGTAACACCCGGCGCGGAGGACTGTTCTCCCCGCCCGCCGACCTG-3' | Chemically synthesized ultramer to generate TsrA Ala2 mutants. Underlined degenerate codon encodes the amino acid at the 2 <sup>nd</sup> position of the TsrA core peptide. |
| Amp-TsrA-SP-F | 5'-GAGATCAGCGACTACATGGACGAGA-3'                                                                                                                                       | Primers used in the amplification of <i>tsrA</i> Ala2 variants.                                                                                                             |
| Amp-TsrA-SP-R | 5'-CTGCAACGGTCAGGTCCGGCGGGCG-3'                                                                                                                                       |                                                                                                                                                                             |
| SD3-F         | 5'-ATCGTGTGGGCTTGACG-3'                                                                                                                                               | Primers used in PCR and DNA sequencing to confirm Ala2 variant fosmids. <sup>2</sup>                                                                                        |
| SD3-R         | 5'-CGCGGTGCAATAGGACAT-3'                                                                                                                                              |                                                                                                                                                                             |

## References

- Gust, B., Challis, G. L., Fowler, K., Kieser, T., and Chater, K. F. (2003) PCR-targeted *Streptomyces* gene replacement identifies a protein domain needed for biosynthesis of the sesquiterpene soil odor geosmin, *Proc. Natl. Acad. Sci. U.S.A.* 100, 1541-1546.
- Li, C., Zhang, F., and Kelly, W. L. (2011) Heterologous production of thiostrepton A and biosynthetic engineering of thiostrepton analogs, *Mol. BioSyst.* 7, 82-90.
- Priestley, N. D., Smith, T. M., Shipley, P. R., and Floss, H. G. (1996) Studies on the biosynthesis of thiostrepton: 4-(1-hydroxyethyl)quinoline-2-carboxylate as a free intermediate on the pathway to the quinaldic acid moiety, *Bioorg. Med. Chem.* 4, 1135-1147.
- Bausch, S. L., Poliakova, E., and Draper, D. E. (2005) Interactions of the N-terminal domain of ribosomal protein L11 with thiostrepton and rRNA, *J. Biol. Chem.* 280, 29956-29963.
- Zhang, F., and Kelly, W. L. (2015) Saturation mutagenesis of TsrA Ala4 unveils a highly mutable residue of thiostrepton A, *ACS Chem. Biol.* 10, 998-1009.
- Ryan, P. C., Lu, M., and Draper, D. E. (1991) Recognition of the highly conserved GTPase center of 23S ribosomal RNA by ribosomal protein L11 and the antibiotic thiostrepton, *J. Mol. Biol.* 221, 1257-1268.
- Datsenko, K. A., and Wanner, B. L. (2000) One-step inactivation of chromosomal genes in *Escherichia coli* K-12 using PCR products, *Proc. Natl. Acad. Sci. U.S.A.* 97, 6640-6645.
